# Supplementary material for: Computation-Aided Development of Next-Generation Extractants for Trivalent Actinide and Lanthanide Separation
Source: PubMed Central journal article supplement — JACS Au. 2024 Sep 23;4(12):4744–56. doi: 10.1021/jacsau.4c00684 (PMC11672149; doi:10.1021/jacsau.4c00684), 2024-09-23
Supplement: au4c00684_si_001.pdf [file au4c00684_si_001.pdf]

## *Supporting Information*

### **Computation-Aided Development of Next-Generation Extractants for Trivalent Actinide and Lanthanide Separation**

Xiaofan Yang<sup>1#</sup>, Dong Fang<sup>1,5#</sup>, Linjia Chen<sup>3#</sup>, Yaoyang Liu<sup>2</sup>, Shihui Wang<sup>1</sup>, Lei Xu<sup>4</sup>, Anyun Zhang<sup>1</sup>, Jing Su<sup>3\*</sup>, Chao Xu<sup>2\*</sup>, Chengliang Xiao<sup>1,5\*</sup>

1. College of Chemical and Biological Engineering, Zhejiang University, Hangzhou 310058, China

2. Institute of Nuclear and New Energy Technology, Tsinghua University, Beijing 100084, China

3. College of Chemistry, Sichuan University, Chengdu 610064, China

4. Institute of Nuclear-Agricultural Science, Key Laboratory of Nuclear Agricultural Sciences of Ministry of Agriculture and Zhejiang Province, Zhejiang University, Hangzhou 310058, China

5. Institute of Zhejiang University-Quzhou, Quzhou 324000, China

# These authors contributed equally to this work.

\* Corresponding author: [xiaoc@zju.edu.cn](mailto:xiaoc@zju.edu.cn); [xuchao@tsinghua.edu.cn](mailto:xuchao@tsinghua.edu.cn); [jingsu@scu.edu.cn](mailto:jingsu@scu.edu.cn)

# Content

|                                                                                          |     |
|------------------------------------------------------------------------------------------|-----|
| S 1 Experimental Section.....                                                            | S4  |
| S 1.1 Chemicals and Reagents .....                                                       | S4  |
| S 1.2 Synthesis of Extractants.....                                                      | S4  |
| S 1.2.1 Synthesis of <b>L1</b> extractant .....                                          | S4  |
| S1.2.2 Synthesis of <b>L2</b> extractant .....                                           | S5  |
| S1.2.3 Synthesis of <b>L3</b> extractant .....                                           | S6  |
| S 1.3 Solvent Extraction and Stripping.....                                              | S8  |
| S 2 Results and Discussion .....                                                         | S9  |
| S 2.1 Theoretical Prediction and Screening.....                                          | S9  |
| S 2.1.1 The Most Stable Conformation of ML-type Complexes using DFT<br>Calculations..... | S9  |
| S 2.1.2 Bonding Analysis of ML-Type Complexes .....                                      | S11 |
| S 2.1.3 ETS-NOCV:.....                                                                   | S11 |
| S 2.1.4 Thermodynamic calculations and orbital analysis of ML-type Complexes<br>.....    | S16 |
| S 2.2 Organic Synthesis .....                                                            | S18 |
| S 2.2.1 Intermediate <b>1</b> .....                                                      | S18 |
| S 2.2.2 Intermediate <b>2</b> .....                                                      | S19 |
| S 2.2.3 Intermediate <b>5</b> .....                                                      | S20 |
| S 2.2.4 <b>L1</b> extractant.....                                                        | S21 |
| S 2.2.5 <b>L2</b> extractant.....                                                        | S22 |
| S 2.2.6 <b>L3</b> extractant.....                                                        | S23 |
| S 2.3 Extraction and Separation Performance .....                                        | S25 |
| S 2.4 Coordination Modes in Solution.....                                                | S25 |
| S 2.4.1 <sup>1</sup> H NMR titration spectra .....                                       | S25 |
| S 2.4.2 ESI-MS spectrum.....                                                             | S26 |
| S 2.4.3 Simulated UV-vis spectra of <b>L3</b> and its Eu complexes .....                 | S26 |
| S 2.4.5 Photoluminescence Spectra Titration .....                                        | S31 |
| S 2.5 Complexes Structures in the Solid State.....                                       | S31 |
| S 2.5.1 Parameters of single crystals of <b>L3</b> complexes .....                       | S31 |
| S 2.5.2 The Most Stable Configuration of ML <sub>2</sub> -type Complexes Using DFT ..... | S34 |

|                  |     |
|------------------|-----|
| Appendix A ..... | S36 |
| Appendix B ..... | S39 |
| Appendix C ..... | S70 |

## S 1 Experimental Section

### S 1.1 Chemicals and Reagents

The chemical reagents used in this work, such as 1-(trifluoromethyl)-3-nitrobenzene (F-3), and lanthanides nitrate, are all commercially obtained with analytical purity (AR), which were directly used without any further purification. Europium perchlorate was prepared by dissolving europium nitrate solid in excess perchloric acid (1 M HClO<sub>4</sub>) and then heating and re-evaporating (120°C, 6 hours) solution three times. The operating temperature of solvent extraction, stripping, and titration experiments was controlled at 25 ± 1 °C.

### S 1.2 Synthesis of Extractants

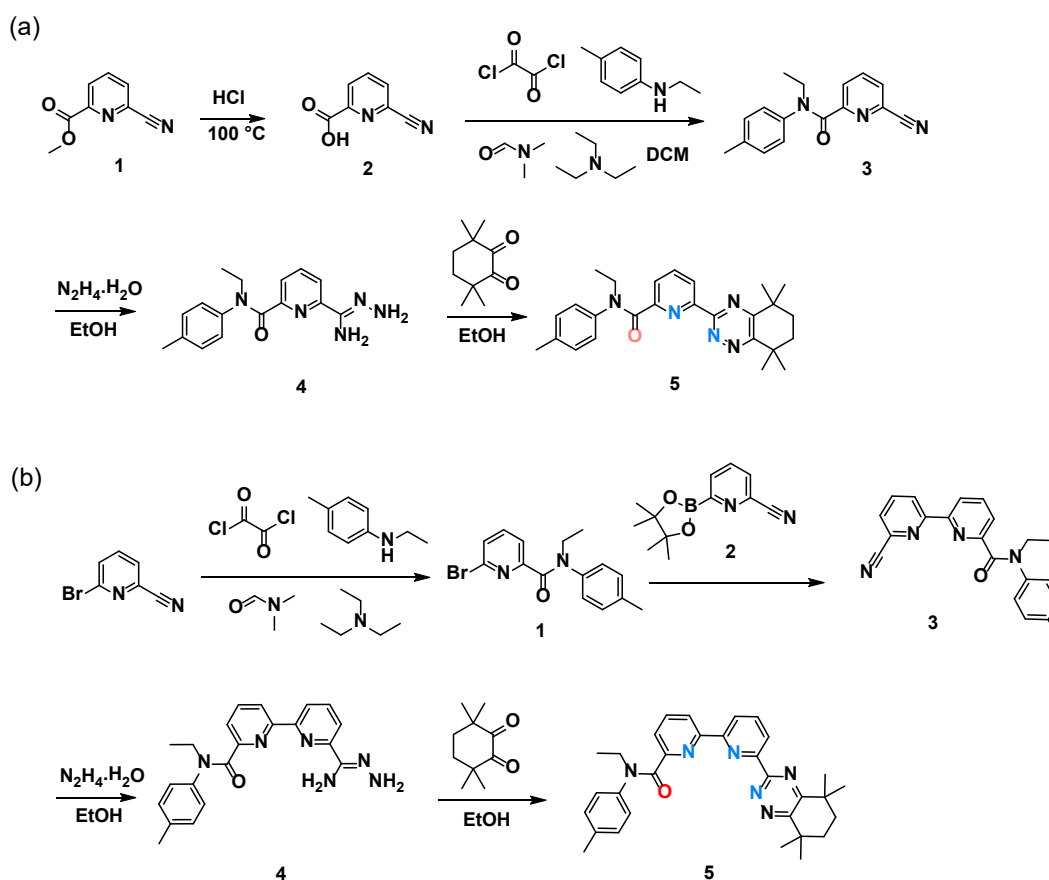

Figure S1. The synthesis route of (a) L1 and (b) L2.

#### S 1.2.1 Synthesis of L1 extractant

The synthesis method of L1 extractant is shown in Figure S1(a): Compound 1 (6-cyano-2-pyridine carboxylic acid methyl ester, 1.0 g, 6.2 mmol) was weighed and added into 10 mL dilute hydrochloric acid solution with a concentration of 1 mol/L, and the reflux reaction was heated for 2 hours. After the reaction, it was cooled to room temperature, and a white solid was precipitated at the bottom of the container. Compound 2 (0.7 g) could be obtained by filtration.

Compound **2** (0.29 g, 2.0 mmol) was dissolved in 15 mL dichloromethane, followed by (0.25 g, 2.0 mmol) oxaloyl chloride and 2 drops of DMF solution, stirred until no gas was formed, and then N-ethyl-4-methylaniline (0.27 g, 2 mmol) was added for reaction for 12 hours. After the reaction was completed, a water quenching reaction was added, and 30 mL ethyl acetate was used for extraction 3 times. The organic phase was dried with Na<sub>2</sub>SO<sub>4</sub>, and the white solid **3** (0.39 g, 75% yield) was separated by column chromatography.

Compound **3** (0.52 g, 2.0 mmol) was weighed and dissolved in 20 mL ethanol solution, then 7 mL hydrazine hydrate was added and the reaction was complete after stirring for 4 hours. Then, a water quenching reaction was added, ethyl acetate extraction (15 mL × 3 times). The organic phase was collected from the separated liquid, and the yellow solid **4** (0.53 g, 89% yield) was separated by Na<sub>2</sub>SO<sub>4</sub> drying and column chromatography.

Compound **4** (0.22 g, 0.66 mmol) and 3,3,6,6-tetramethylcyclohexane-1,2-dione (0.12 g, 0.72 mmol) were added to the solution of ethanol and triethylamine with v/v=10:1, heated to reflux, and the reaction was complete after 6 hours of agitation. Cooling to room temperature, quenching reaction with water, extraction with ethyl acetate (10 mL × 3 times). The organic phase was collected in a separate liquid, Na<sub>2</sub>SO<sub>4</sub> was dried, and yellow solid **L1** (0.23 g, yield 82%) was separated by column chromatography.

### *S1.2.2 Synthesis of **L2** extractant*

The synthesis method of **L2** extractant is shown in Figure S1(b). The compound 5-bromo-2-pyridinecarbonitrile (1.99 g, 10.9 mmol) was weighed and added to methylene chloride solution, followed by the addition of (1.38 g, 10.9 mmol) oxaloyl chloride and 4 drops of DMF solution, and stirred until no gas was formed. N-ethyl-4-methylaniline (1.05 g, 10.9 mmol) was added and the reaction lasted overnight (12 hours). Add water quenching reaction, and ethyl acetate extraction (30 mL × 3 times), the organic phase was collected by liquid separation, Na<sub>2</sub>SO<sub>4</sub> drying, and white solid **1** (2.82 g, 81% yield) was separated by column chromatography.

Compound **1** (0.41 g, 1.2 mmol), compound **2** (0.26 g, 1.1 mmol), potassium carbonate (0.23 g, 1.6 mmol), tetrakis(triphenylphosphine)palladium (0.11 g, 0.11 mmol) were added to the glass reaction bottle, and vacuum filled with argon gas as protection gas. DMF and aqueous solution of v:v=10:1 was added to the reaction bottle, and the reaction was completed by heating and stirring under reflux overnight (12 hours). After cooling to room temperature, adding water quenching reaction, and ethyl acetate extraction (10 mL × 3 times), the organic phase was collected by liquid separation, Na<sub>2</sub>SO<sub>4</sub> drying, and white solid **3** (0.13 g, 36% yield) was separated by column chromatography.

Compound **3** (0.34 g, 1.0 mmol) was dissolved in 15 mL ethanol solution, 4 mL hydrazine hydrate was added, and the reaction was complete after stirring for 5 hours. After the water quenching reaction, and ethyl acetate extraction (10 mL  $\times$  3 times), the organic phase was collected by liquid separation, Na<sub>2</sub>SO<sub>4</sub> drying, and yellow solid **4** (0.34 g, 91% yield) was separated by column chromatography.

Compound **4** (0.34 g, 1.0 mmol) and 3,3,6,6-tetramethylcyclohexane-1,2-dione (0.18 g, 1.1 mmol) were added to the solution of ethanol and triethylamine with v:v=10:1, and the reaction was complete after heating and stirring under reflux for 5 hours. After cooling to room temperature, quenching reaction with water, and extraction with ethyl acetate (10 mL  $\times$  3 times), the organic phase was collected by liquid separation, Na<sub>2</sub>SO<sub>4</sub> drying, yellow **L2** solid (0.44 g, 86% yield) was separated by column chromatography.

### *S1.2.3 Synthesis of L3 extractant*

Intermediate **1**: First, 7-methylquinoline (5 g, 35 mmol) was dissolved in dichloromethane (DCM), and 3-chloroperbenzoic acid (6.6 g, 38.5 mmol) was added, and the reaction was 7-12 hours at room temperature. With sodium bicarbonate solution quenching reaction, dichloromethane extraction, dried over Na<sub>2</sub>SO<sub>4</sub>, 7-methylquinoline oxide, directly used in the next reaction. 7-methylquinoline oxide (5 g, 31.4 mmol) was dissolved in anhydrous dichloromethane, and benzoyl chloride (6.6 g, 47.1 mmol) and trimethylsilyl cyanide (4.6 g, 47.1 mmol) were slowly added and reacted at room temperature for 7-12 hours. Sodium bicarbonate solution was added to quench reaction, dichloromethane was extracted, Na<sub>2</sub>SO<sub>4</sub> was used to dry, and 2-cyano-7-methylquinoline was separated by column chromatography. 2-cyano-7-methylquinoline (5 g, 29.7 mmol) was dissolved in sulfuric acid solution (15 mL), and nitric acid (6.5 mL) was slowly added to the ice bath for 1 hour. Then the reaction liquid was introduced into the ice block for quenching reaction, dichloromethane extraction, Na<sub>2</sub>SO<sub>4</sub> drying, and column chromatography to obtain 2-cyano-7-methyl-8-nitroquinoline. 2-cyano-7-methyl-8-nitroquinoline (5 g, 23.4 mmol) was dissolved in DMF (25 mL), followed by N,N-dimethylformamide dimethyl acetal (4.2 g, 35.1 mmol) for 7-12 hours. After stopping the reaction, the reaction liquid was poured into water, the solid was precipitated, and 2-cyano-7-(N, N-dimethylamine-vinyl)-8-nitro-quinoline solid was filtered, and the next step was direct reaction. 2-cyano-7-(N, N-dimethylamine-vinyl)-8-nitro-quinoline (2.7 g, 10.0 mmol) was dissolved in tetrahydrofuran and water (v:v = 1:1, 60 mL) solution, and sodium periodate (3.2 g, 15.0 mmol) was added for 6-8 hours. 2-cyano-7-aldehyde-8-nitro-quinoline was obtained by water quenching reaction, extraction by ethyl acetate, drying by Na<sub>2</sub>SO<sub>4</sub>, and separation by

column chromatography to afford the desired product. 2-cyano-7-aldehyde-8-nitro-quinoline (2.3 g, 10.0 mmol) was added into the solution of ethanol and acetic acid (v:v = 4:1, 40 mL), and iron powder (2.8 g, 50.0 mmol) was added, and heated to 50-80°C for 4-8 hours. Then, it was filtered hot, dried with Na<sub>2</sub>SO<sub>4</sub> by ethyl acetate extraction, and separated by column chromatography to obtain intermediate **1**.

Intermediate **2**: Add pyruvate (1.0 g, 11.4 mmol) to DCM (20 mL), then add oxaloyl chloride (1.4 g, 11.4 mmol) and 2 drops of DMF solution, stirring until no gas was produced. Then, N-ethyl-4-methylaniline (1.4 g, 11.4 mmol) was dissolved in dichloromethane (10 mL), slowly added to the reaction solution, and the reaction was carried out overnight at room temperature. The intermediate **2** was obtained by water quenching reaction, extraction by ethyl acetate, drying by Na<sub>2</sub>SO<sub>4</sub>, and separation by column chromatography to afford the desired product.

Intermediate **5**: Ethyl isobutyrate (6.27 g, 54 mmol) was added to 60 mL diethyl ether under Ar atmosphere at 0 °C. Lithium diisopropylamide (55.34 mmol in THF solution) was added dropwise and then the mixture was stirred for 1 hour. Subsequently, ethylene di(ptoluenesulfonate) (10.0 g, 27.0 mmol) was added several times over 20 min and then the reaction mixture was refluxed under 45 °C over 24 hours. After the solid was filtered, the filtrate evaporated to obtain the crude product (5.2 g) which used without further purification. Sodium (3.1 g, 134 mmol) was added to 50 mL dry toluene under Ar atmosphere and then refluxed over 1 hour until the sodium melted. Subsequently, the diethyl 2,2,5,5-tetramethylhexanedioate (6.9 g, 26.9 mmol) and chlorotrimethylsilane (14.5 g, 134 mmol) were added, respectively. The reaction mixture was heated to 130 °C for 24 hours and then cooled to room temperature. The mixture was filtered through diatomaceous earth and then washed with diethyl ether, and the filtrate was concentrated under reduced pressure. The residue was purified by flash column chromatography to yield the 1,2-bis(trimethylsilyloxy)-3,3,6,6-tetramethylcyclohex-1-ene **12** (5.1 g, 16.2 mmol). Finally, all the previous product was dissolved in DCM and bromine (2.6 g, 16.2 mmol) was slowly added over 20 min. The reaction mixture was stirred at room temperature for 1 hour. Subsequently, the reaction was quenched with sodium thiosulfate (aq.) until the solution was pale yellow and was extracted with DCM (30 mL × 3). The combined organic layer was washed with brine (50 mL), dried over MgSO<sub>4</sub> and concentrated under reduced pressure. The residue was purified by flash column chromatography (DCM: PE = 5:3) to yield the intermediate **5** as yellow solid.

The synthesis method of **L3** extractant is shown in Figure 1(d). Intermediate **1** (0.4 g, 2 mmol) and intermediate **2** (0.4 g, 2.0 mmol) were added to 30 mL ethanol solution, then 0.2 mL ethanol

solution saturated with KOH was added and heated to 50 °C for 5 hours. Then the reaction was stopped and left at room temperature, without post-processing, directly used for the next reaction. The solution obtained in the previous step was directly added to 8 mL of 85% hydrazine hydrate solution and reacted overnight at room temperature. After the reaction, dilute with aqueous solution and extract with ethyl acetate (30 mL × 3 times). The organic phase was combined, dried with anhydrous sodium sulfate and separated by column chromatography (DCM: MeOH = 5:1) to obtain yellow solid **4**. Compound **4** (0.4 g, 1.0 mmol) and 3,3,6,6-tetramethylcyclohexane-1,2-dione (compound **5**) were heated in a mixture of 20 mL of tetrahydrofuran and triethylamine (v/v = 10:1) for 8 hours of reflux reaction, then the heating was stopped and cooled to room temperature. Then dilute with water, extract with ethyl acetate (20 mL) 3 times, and dry with Na<sub>2</sub>SO<sub>4</sub>. The product was obtained by column chromatography (DCM: MeOH = 10:1) and a yellowish solid (**L3**) was obtained.

### S 1.3 Solvent Extraction and Stripping

The distribution ratio ( $D$ ), the extraction efficiency ( $E$ , %) and the stripping efficiency ( $S$ , %) were calculated as follows:

$$D = \frac{C_{org.}}{C_{aq.}} \quad (S1)$$

$$E(\%) = \frac{C_{org.}}{C_F} \times \frac{V_{org.}}{V_F} \times 100\% \quad (S2)$$

$$S(\%) = \frac{C_{str.aq.}}{C_{ext.org.}} \times 100\% \quad (S3)$$

The general extraction equilibriums can be described by equation (S4). (The subscript (org.) or (aq.) indicate that the substance exists in the organic phase or aqueous phase)

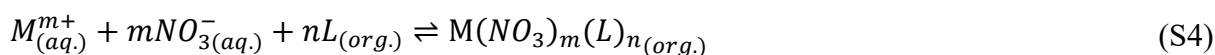

$n$  is the coordination number of ligand to metal ion, the corresponding extraction equilibrium constant,  $K_{ex}$ , can be defined as:

$$K_{ex} = \frac{[M(NO_3)_m(L)_n]_{(org.)}}{[M^{m+}]_{(aq.)}[NO_3^-]_{(aq.)}^m[L]_{(org.)}^n} \quad (S5)$$

The distribution ratio of metal ion,  $D_M$ , can be represented as:

$$D_M = \frac{[M(NO_3)_m(L)_n]_{(org.)}}{[M^{m+}]_{(aq.)}} \quad (S6)$$

By substituting equation (S6) into equation (S5), and transforming Eq. (S6) into the log



form, equation (S7), (S8), and (S9) are obtained:

$$\text{Log}D_M = \log K_{ex} + n \log [L]_{(org.)} + m \log [NO_3]_{(aq.)} \quad (\text{S7})$$

$$\text{Log}D_M = n \log [L]_{(org.)} + C_1 \quad (C_1 = \log K_{ex} + m \log [NO_3]_{(aq.)}) \quad (\text{S8})$$

$$\text{Log}D_M = m \log [NO_3]_{(aq.)} + C_2 \quad (C_2 = \log K_{ex} + n \log [L]_{(org.)}) \quad (\text{S9})$$

$C_1$  and  $C_2$  are the constants when the corresponding condition is controlled. Based on above analysis, keeping the concentration of nitric acid constant, the slope of log-log plot regarding  $D$  vs. initial  $[L]$  present the number of extractant molecules coordinated to metal ion in the organic phase.

## S 2 Results and Discussion

### S 2.1 Theoretical Prediction and Screening

#### S 2.1.1 The Most Stable Conformation of ML-type Complexes using DFT Calculations

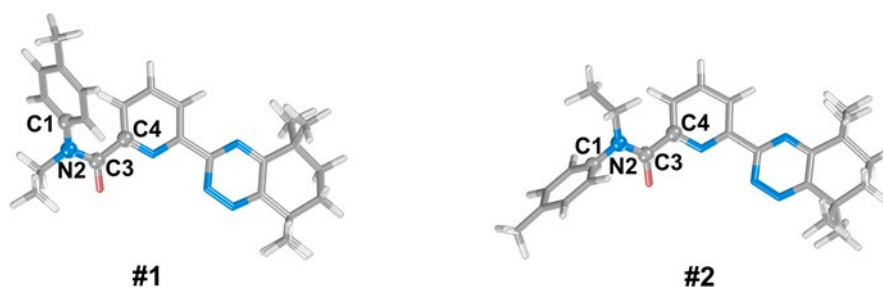

**Figure S2.** Comparison of two configurations of the ligand in the ML-type complexes. For configuration #1, the benzyl group and the central skeleton are on the same side of the N2-C3 bond, and the absolute value of the dihedral angle C1-N2-C3-C4 is less than 90 degrees. For configuration #2, the benzyl group and the central skeleton are on opposite sides of the N2-C3 bond, and the absolute value of the dihedral angle C1-N2-C3-C4 is greater than 90 degrees.

**Table S1.** Relative energies ( $\Delta E$  in kcal/mol) of two isomers of Am(L)(NO<sub>3</sub>)<sub>3</sub> (L=L1, L2, L3) complexes.

| Isomers    | Am(L1)(NO <sub>3</sub> ) <sub>3</sub> | Am(L2)(NO <sub>3</sub> ) <sub>3</sub> | Am(L3)(NO <sub>3</sub> ) <sub>3</sub> |
|------------|---------------------------------------|---------------------------------------|---------------------------------------|
| <i>is1</i> | 0                                     | 0                                     | 0                                     |
| <i>is2</i> | 2.27                                  | 2.37                                  | 3.10                                  |

**Table S2.** Relative energies ( $\Delta E$  in kcal/mol) of two isomers of Eu(L)(NO<sub>3</sub>)<sub>3</sub> (L=L1, L2, L3) complexes.

| Isomers    | Eu(L1)(NO <sub>3</sub> ) <sub>3</sub> | Eu(L2)(NO <sub>3</sub> ) <sub>3</sub> | Eu(L3)(NO <sub>3</sub> ) <sub>3</sub> |
|------------|---------------------------------------|---------------------------------------|---------------------------------------|
| <i>is1</i> | 0                                     | 0                                     | 0                                     |
| <i>is2</i> | 3.07                                  | 2.61                                  | 2.74                                  |

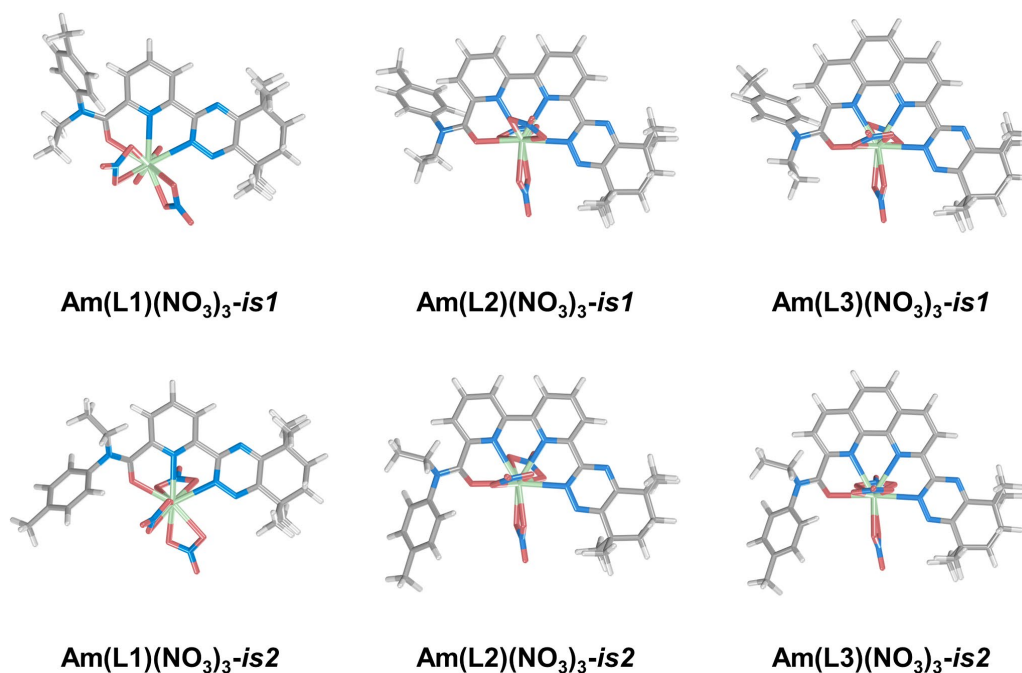

**Figure S3.** Optimized structures of two isomers of Am(L)(NO<sub>3</sub>)<sub>3</sub> (L=L1, L2, L3) complexes labelled by Am(L)(NO<sub>3</sub>)<sub>3</sub>-is1 and Am(L)(NO<sub>3</sub>)<sub>3</sub>-is2, respectively, with the ligand adopting configuration #1 and #2, respectively, shown in Figure S2.

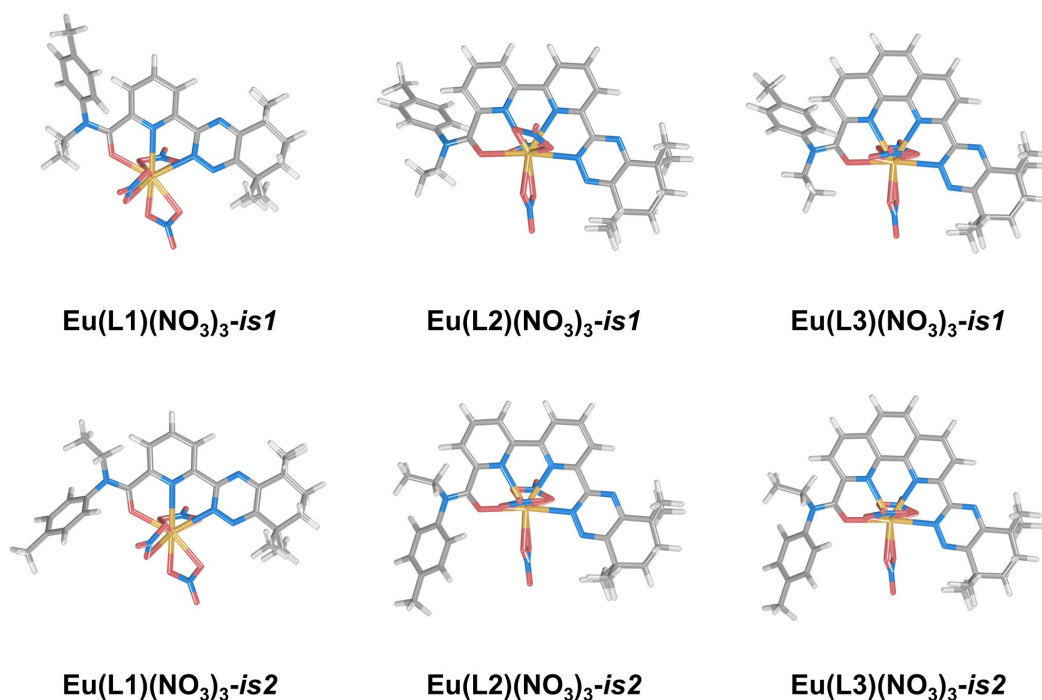

**Figure S4.** Optimized structures of two isomers of Eu(L)(NO<sub>3</sub>)<sub>3</sub> (L=L1, L2, L3) complexes labelled by Eu(L)(NO<sub>3</sub>)<sub>3</sub>-is1 and Eu(L)(NO<sub>3</sub>)<sub>3</sub>-is2, respectively, with the ligand adopting configuration #1 and #2, respectively, shown in Figure S2.

### S 2.1.2 Bonding Analysis of ML-Type Complexes

**Table S3.** Calculated M-O and M-N Bond Lengths (Å) of the M(L)(NO<sub>3</sub>)<sub>3</sub> (M=Am(III), Eu(III))<sup>a</sup>

| Complexes                            | M-O   |       | M-N <sub>1</sub> |       | M-N <sub>2</sub> |       | M-N <sub>3</sub> |       |
|--------------------------------------|-------|-------|------------------|-------|------------------|-------|------------------|-------|
|                                      | Am    | Eu    | Am               | Eu    | Am               | Eu    | Am               | Eu    |
| M(L1)(NO <sub>3</sub> ) <sub>3</sub> | 2.526 | 2.444 | 2.630            | 2.628 | -                | -     | 2.599            | 2.620 |
| M(L2)(NO <sub>3</sub> ) <sub>3</sub> | 2.499 | 2.461 | 2.647            | 2.614 | 2.683            | 2.651 | 2.584            | 2.569 |
| M(L3)(NO <sub>3</sub> ) <sub>3</sub> | 2.512 | 2.465 | 2.637            | 2.606 | 2.674            | 2.639 | 2.607            | 2.573 |

<sup>a</sup>O: The O atom in the amide side chain. N<sub>1</sub>, N<sub>2</sub>: The N atom in the central skeleton. N<sub>3</sub>: The N atom in the triazine side chain.

**Table S4.** Bond order analysis of [M(L)(NO<sub>3</sub>)<sub>3</sub>] (M=Am(III), Eu(III)) complexes.<sup>a</sup>

| Complexes                            | Bond Orders | M-O   |       | M-N <sub>1</sub> |       | M-N <sub>2</sub> |       | M-N <sub>3</sub> |       |
|--------------------------------------|-------------|-------|-------|------------------|-------|------------------|-------|------------------|-------|
|                                      |             | Am    | Eu    | Am               | Eu    | Am               | Eu    | Am               | Eu    |
| M(L1)(NO <sub>3</sub> ) <sub>3</sub> | MAYER       | 0.258 | 0.233 | 0.196            | 0.131 | -                | -     | 0.224            | 0.149 |
|                                      | N-M         | 1.139 | 1.097 | 0.670            | 0.652 | -                | -     | 0.516            | 0.456 |
| M(L2)(NO <sub>3</sub> ) <sub>3</sub> | MAYER       | 0.259 | 0.228 | 0.180            | 0.145 | 0.176            | 0.145 | 0.185            | 0.143 |
|                                      | N-M         | 1.110 | 1.078 | 0.665            | 0.634 | 0.672            | 0.638 | 0.464            | 0.433 |
| M(L3)(NO <sub>3</sub> ) <sub>3</sub> | MAYER       | 0.256 | 0.224 | 0.176            | 0.140 | 0.180            | 0.143 | 0.182            | 0.140 |
|                                      | N-M         | 1.111 | 1.069 | 0.655            | 0.629 | 0.670            | 0.635 | 0.458            | 0.424 |

<sup>a</sup>Bond-orders calculated from two-electron valence indices based on partitioning of tr( $\Delta P^2$ ) (4-index set).

**Table S5.** Energy decomposition analysis of the total bonding interaction (in kcal/mol) between fragments M(NO<sub>3</sub>)<sub>3</sub> and ligand in M(L)(NO<sub>3</sub>)<sub>3</sub> (M=Am(III), Eu(III)) complexes.

| Complexes                            | Metal   | Steric interaction |        |                  | orbital interaction | Total bonding energy <sup>b</sup> | orb% <sup>c</sup> |
|--------------------------------------|---------|--------------------|--------|------------------|---------------------|-----------------------------------|-------------------|
|                                      |         | electrostatic      | Pauli  | Sum <sup>a</sup> |                     |                                   |                   |
| M(L1)(NO <sub>3</sub> ) <sub>3</sub> | Am(III) | -108.60            | 105.75 | -2.85            | -62.38              | -65.23                            | 36.48%            |
|                                      | Eu(III) | -91.86             | 84.83  | -7.03            | -51.68              | -58.70                            | 36.00%            |
| M(L2)(NO <sub>3</sub> ) <sub>3</sub> | Am(III) | -140.76            | 140.32 | -0.44            | -79.68              | -80.12                            | 36.15%            |
|                                      | Eu(III) | -127.65            | 125.04 | -2.61            | -70.70              | -73.30                            | 35.64%            |
| M(L3)(NO <sub>3</sub> ) <sub>3</sub> | Am(III) | -138.23            | 136.86 | -1.37            | -79.32              | -80.69                            | 36.46%            |
|                                      | Eu(III) | -126.26            | 122.67 | -3.57            | -70.70              | -74.30                            | 35.90%            |

<sup>a</sup>Steric interaction is the sum of electrostatic interactions and Pauli interactions.

<sup>b</sup>Total bonding energy is the sum of steric interactions and orbital interactions.

<sup>c</sup>The percentage of orbital interactions in the total sum of electrostatic and orbital interactions.

### S 2.1.3 ETS-NOCV:

The natural orbitals for chemical valence (NOCV) deformation densities of alpha and beta spin, along with their associated energy contributions ( $\Delta E_k$  in kcal/mol), corresponding eigenvalues, and the symmetrized fragment orbitals (SFO), are provided. The contour values are 0.0003 a.u. for the NOCV orbitals and 0.03 a.u. for the SFO, respectively. Blue represents positive, and red represents negative. The value  $\nu$  quantifies the number of electrons transferred

between the SFO, in which negative and positive values respectively represent electron loss and electron gain. The compositions of the acceptor orbitals are also provided.

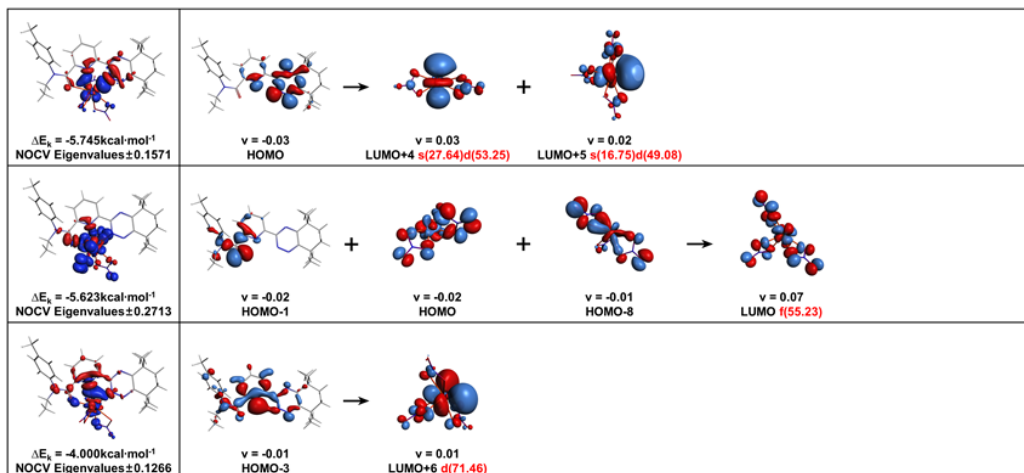

**Figure S5.** The ETS-NOCV analysis of the alpha spin in Eu(L1)(NO<sub>3</sub>)<sub>3</sub> complex.

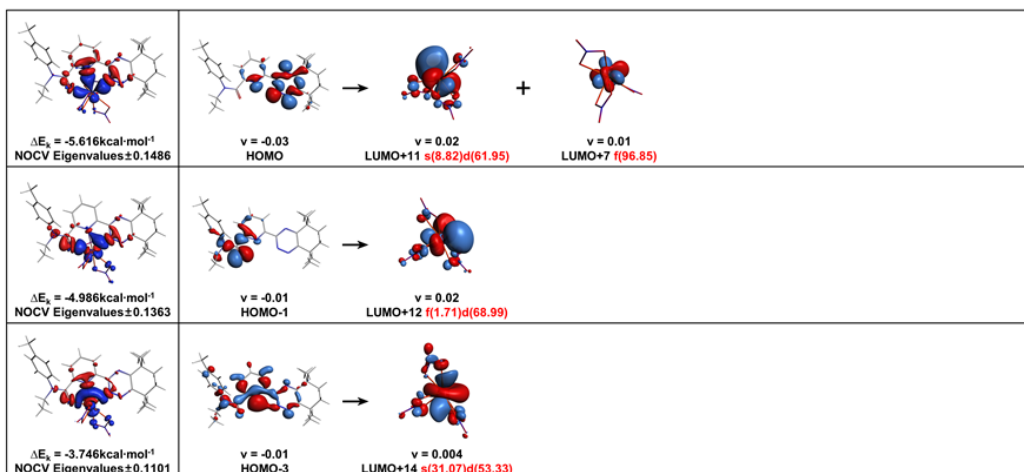

**Figure S6.** The ETS-NOCV analysis of the beta spin in Eu(L1)(NO<sub>3</sub>)<sub>3</sub> complex.

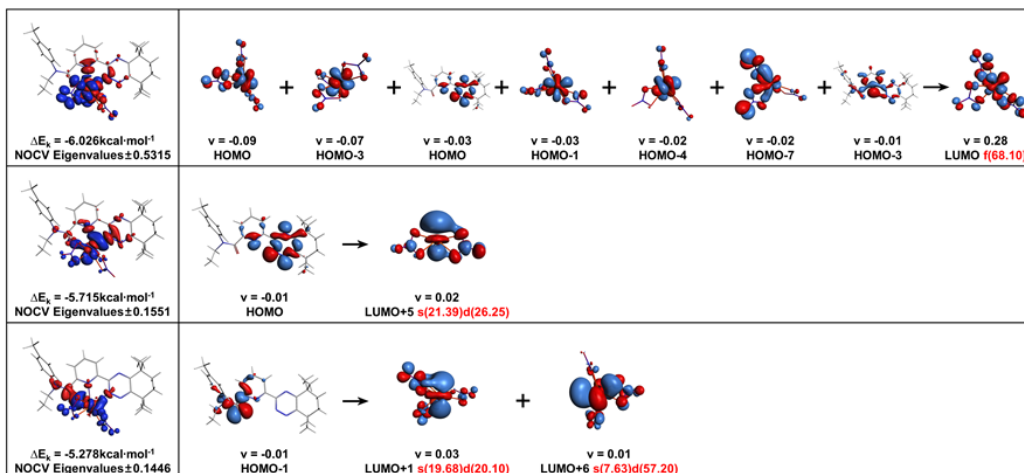

**Figure S7.** The ETS-NOCV analysis of the alpha spin in Am(L1)(NO<sub>3</sub>)<sub>3</sub> complex.

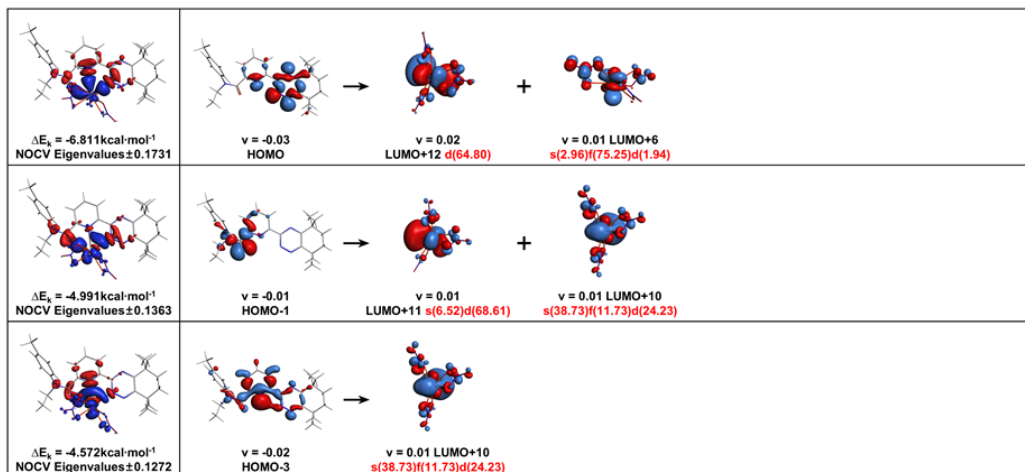

**Figure S8.** The ETS-NOCV analysis of the beta spin in Am(L1)(NO<sub>3</sub>)<sub>3</sub> complex.

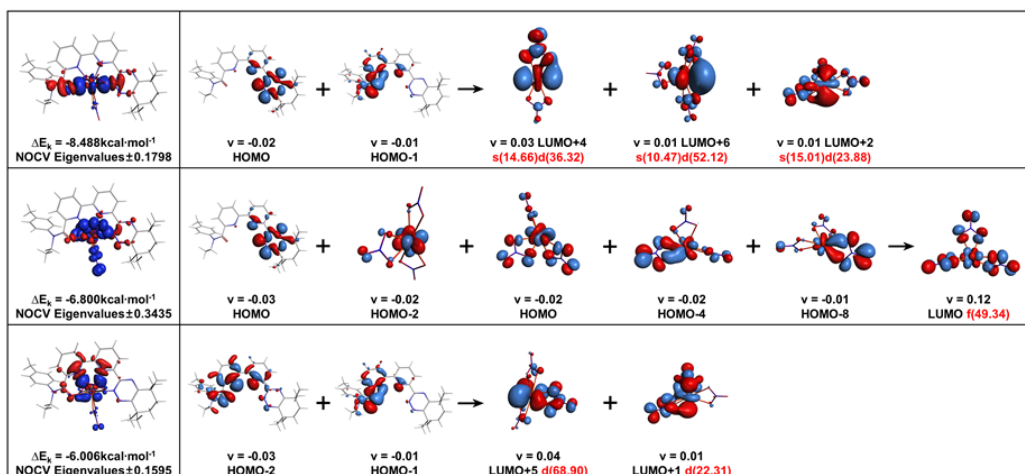

**Figure S9.** The ETS-NOCV analysis of the alpha spin in Eu(L2)(NO<sub>3</sub>)<sub>3</sub> complex.

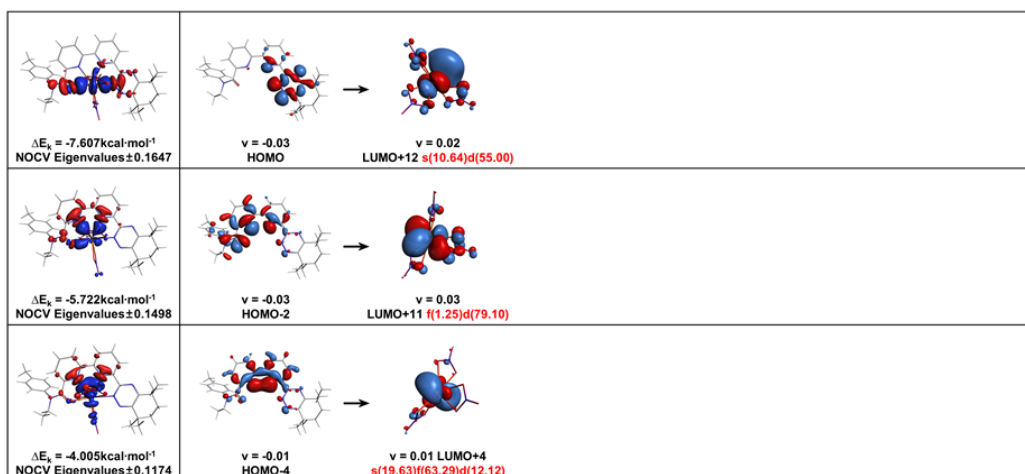

**Figure S10.** The ETS-NOCV analysis of the beta spin in Eu(L2)(NO<sub>3</sub>)<sub>3</sub> complex.

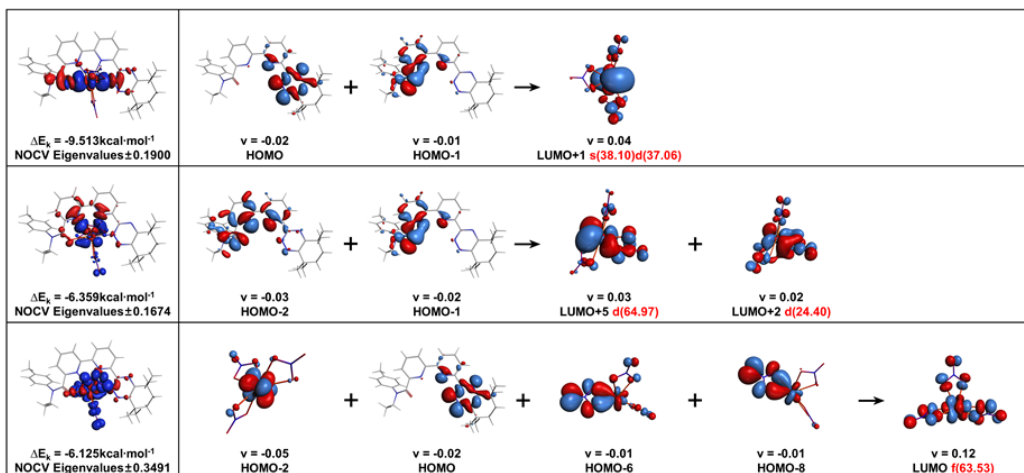

**Figure S11.** The ETS-NOCV analysis of the alpha spin in  $\text{Am}(\text{L}2)(\text{NO}_3)_3$  complex.

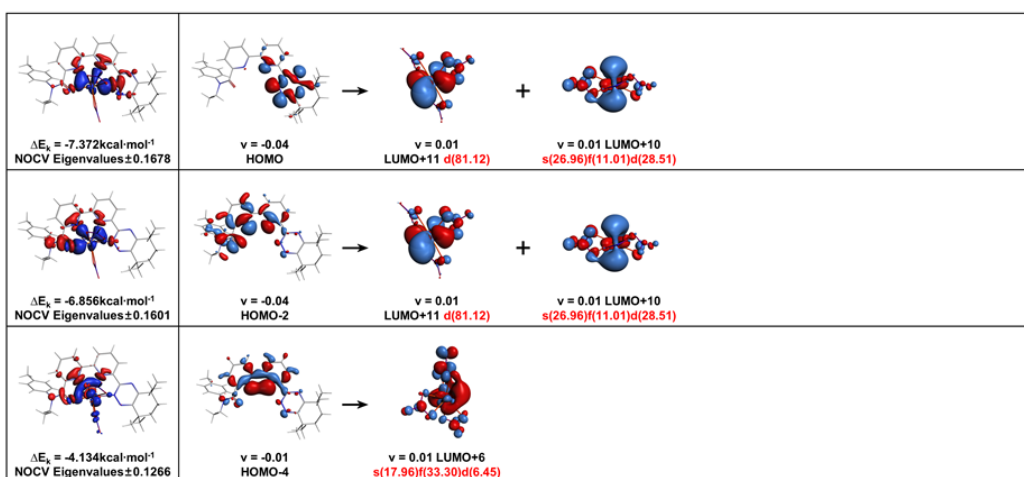

**Figure S12.** The ETS-NOCV analysis of the beta spin in  $\text{Am}(\text{L}2)(\text{NO}_3)_3$  complex.

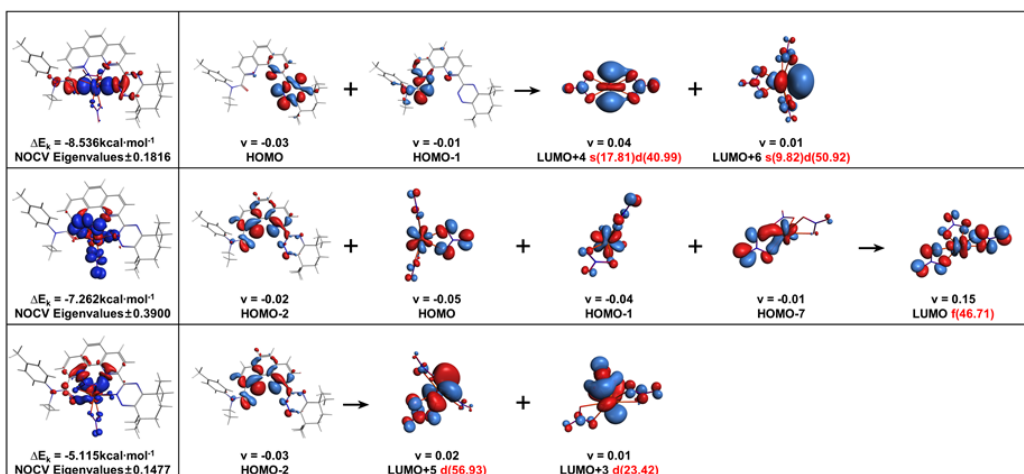

**Figure S13.** The ETS-NOCV analysis of the alpha spin in  $\text{Eu}(\text{L}3)(\text{NO}_3)_3$  complex.

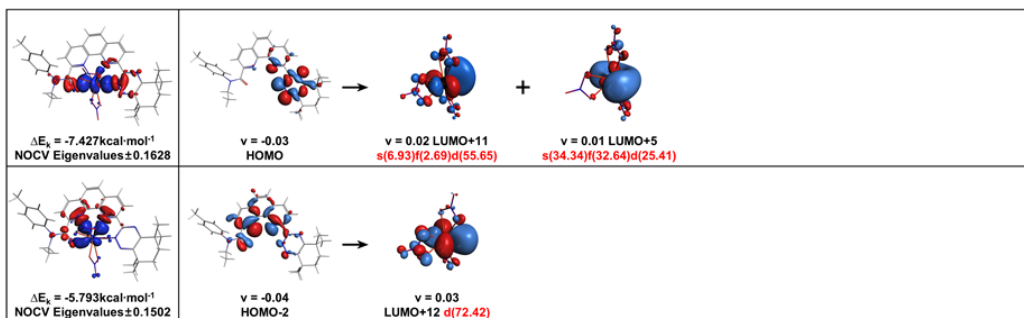

**Figure S14.** The ETS-NOCV analysis of the beta spin in  $\text{Eu}(\text{L3})(\text{NO}_3)_3$  complex.

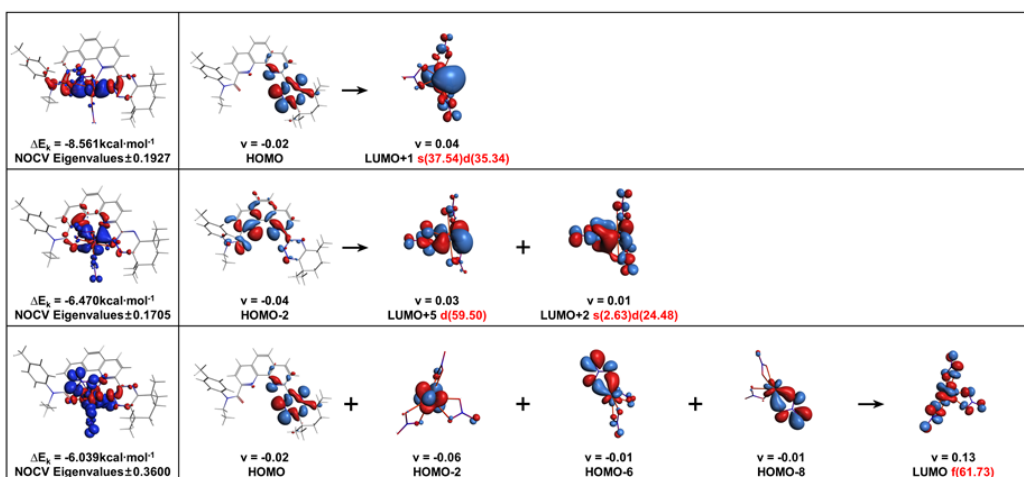

**Figure S15.** The ETS-NOCV analysis of the alpha spin in  $\text{Am}(\text{L3})(\text{NO}_3)_3$  complex.

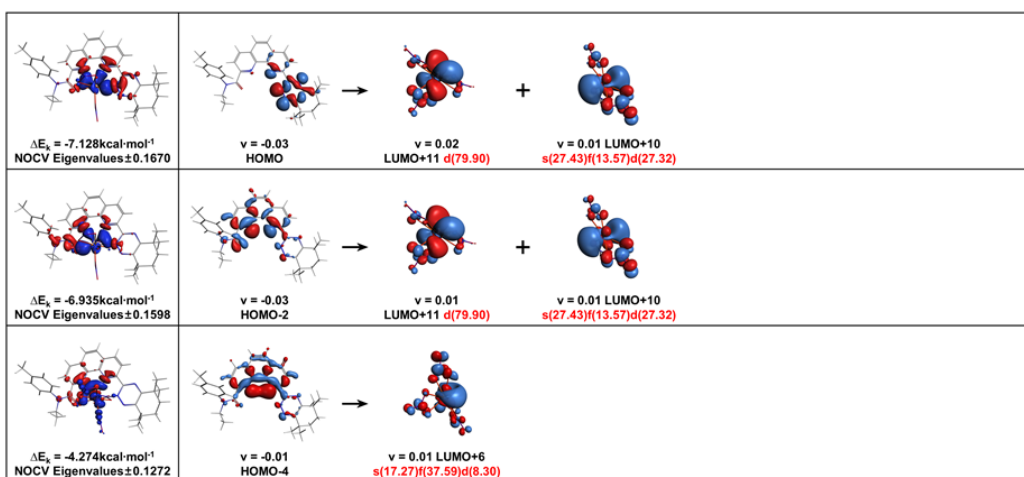

**Figure S16.** The ETS-NOCV analysis of the beta spin in  $\text{Am}(\text{L3})(\text{NO}_3)_3$  complex.

### S 2.1.4 Thermodynamic calculations and orbital analysis of ML-type Complexes

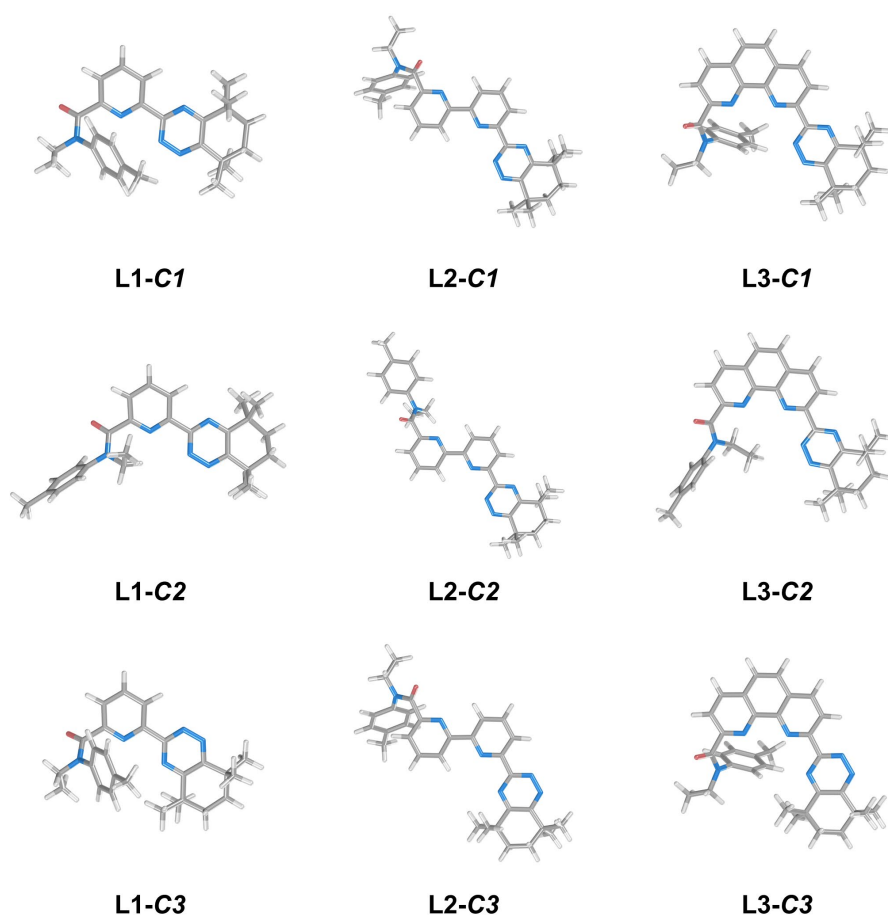

**Figure S17.** Optimized structures of **L1**, **L2** and **L3** in gas phase. **C1**: The most stable conformation and are employed for thermodynamic calculations. **C2**: Obtained by rotating the amide side chain during the initial modeling process based on **C1**. In this case, the orientation of the O atom in the optimized conformation remains unchanged regardless of rotation. **C3**: Obtained by rotating the triazine side chain during the initial modeling process based on **C1**.

**Table S6.** Relative Energies ( $\Delta E$  in kcal/mol) of Various Conformations in the Ligand.

| Conformations | <b>L1</b> | <b>L2</b> | <b>L3</b> |
|---------------|-----------|-----------|-----------|
| C1            | 0         | 0         | 0         |
| C2            | 3.65      | 1.64      | 0.77      |
| C3            | 0.26      | 1.98      | 0.30      |

The initial structures for the free ligands were constructed by modifying similar structures found in published literature. During the modeling of these initial structures, we considered the conformational changes caused by the rotation of single bonds in the ligands. The three conformations of each ligand are from the convergence results of multiple initial conformations.



**Table S7.** Calculated Gibbs free energies ( $\Delta G$  in kcal/mol) of the complexation reactions of ligands with  $[M(\text{NO}_3)(\text{H}_2\text{O})_8]^{2+}$  and the difference in  $\Delta G$  between Am and Eu ( $\Delta\Delta G$  in kcal/mol) in nitrobenzene.<sup>a</sup>

| Extraction reaction                                                                                                                          | $\Delta G_{\text{ext}}$ |        | $\Delta\Delta G_{\text{ext(Am-Eu)}}$ |
|----------------------------------------------------------------------------------------------------------------------------------------------|-------------------------|--------|--------------------------------------|
|                                                                                                                                              | Am                      | Eu     |                                      |
| $[\text{M}(\text{NO}_3)(\text{H}_2\text{O})_8]^{2+} + \text{L1} + 2\text{NO}_3^- = \text{M}(\text{L1})(\text{NO}_3)_3 + 8\text{H}_2\text{O}$ | -74.84                  | -74.07 | -0.77                                |
| $[\text{M}(\text{NO}_3)(\text{H}_2\text{O})_8]^{2+} + \text{L2} + 2\text{NO}_3^- = \text{M}(\text{L2})(\text{NO}_3)_3 + 8\text{H}_2\text{O}$ | -80.02                  | -76.90 | -3.12                                |
| $[\text{M}(\text{NO}_3)(\text{H}_2\text{O})_8]^{2+} + \text{L3} + 2\text{NO}_3^- = \text{M}(\text{L3})(\text{NO}_3)_3 + 8\text{H}_2\text{O}$ | -83.48                  | -79.74 | -3.63                                |

<sup>a</sup>Due to the absence of parameters for 1-(trifluoromethyl)-3-nitrobenzene solvent in the solvation model, nitrobenzene, which has a similar structure, was used as a substitute. As our focus is on the relative values of  $\Delta\Delta G$ , the impact of the solvation on which is not significant, this substitution is reasonable.

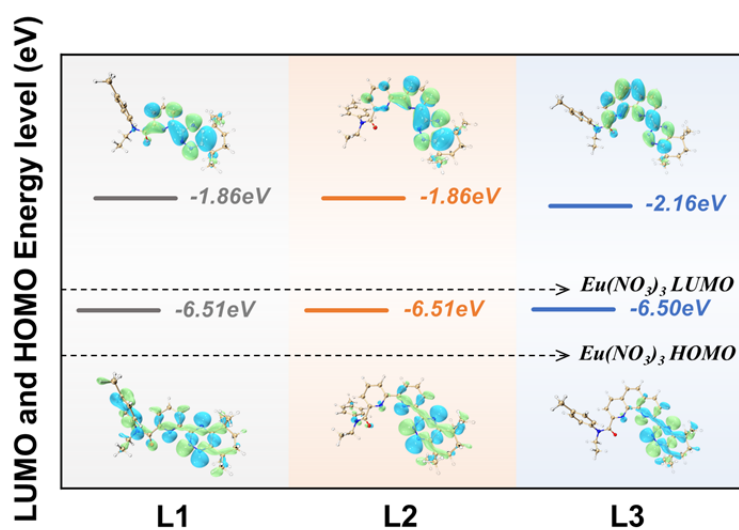

**Figure S18.** Frontier molecular orbital energy level diagram of L1, L2, and L3 fragments in  $\text{Eu}(\text{L})(\text{NO}_3)_3$ . The envelopes of HOMO and LUMO are given with contour values of 0.02 a.u.

## S 2.2 Organic Synthesis

### S 2.2.1 Intermediate 1

$^1\text{H NMR}$  (500 MHz,  $\text{CDCl}_3$ )  $\delta$  10.01 (s, 1H), 8.15 (d,  $J = 8.5$  Hz, 1H), 7.78 (d,  $J = 8.5$  Hz, 1H), 7.68 (d,  $J = 8.5$  Hz, 1H), 7.05 (d,  $J = 8.5$  Hz, 1H);  $^{13}\text{C NMR}$  (125 MHz,  $\text{CDCl}_3$ )  $\delta$  192.88, 148.66, 138.88, 137.10, 133.71, 132.13, 130.37, 126.50, 117.32, 114.02, 112.67.

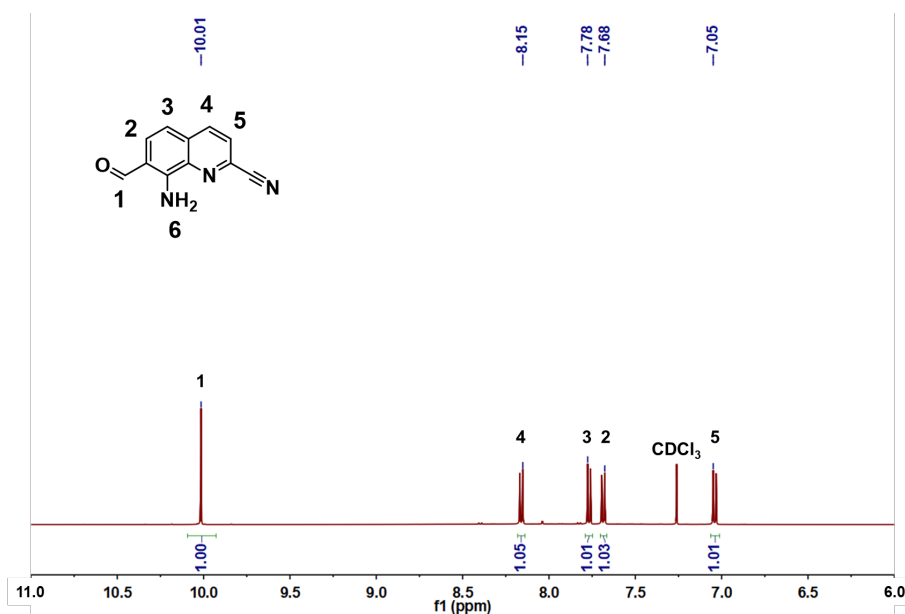

Figure S19. The  $^1\text{H NMR}$  spectrum of 8-amino-7-formylquinoline-2-nitrile.

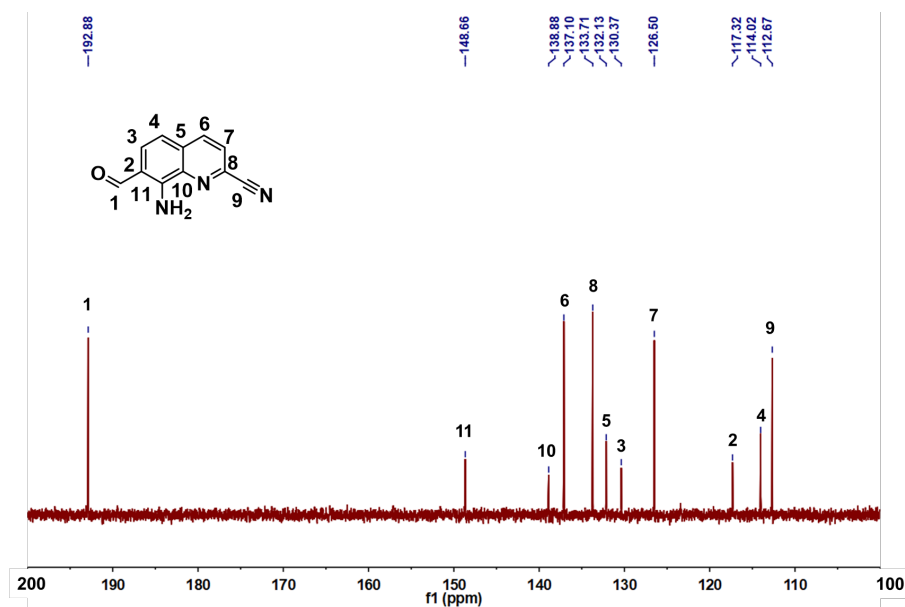

Figure S20. The  $^{13}\text{C NMR}$  spectrum of 8-amino-7-formylquinoline-2-nitrile.

### S 2.2.2 Intermediate 2

$^1\text{H NMR}$  (500 MHz,  $\text{CDCl}_3$ )  $\delta$  7.17 (d,  $J = 8.0$  Hz, 2H), 7.04 (d,  $J = 8.0$  Hz, 2H), 3.79 (q,  $J = 7.0$  Hz, 2H), 2.35 (s, 3H), 2.17 (s, 3H), 1.16 (t,  $J = 7.0$  Hz, 3H);  $^{13}\text{C NMR}$  (125 MHz,  $\text{CDCl}_3$ )  $\delta$  198.32, 166.96, 138.53, 136.98, 130.29, 127.58, 43.60, 27.77, 21.10, 12.63.

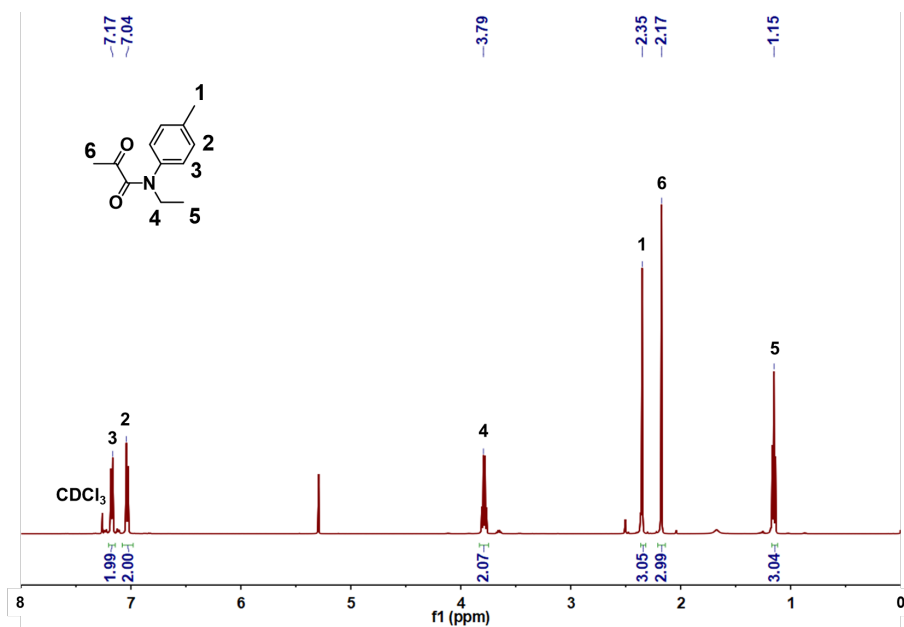

Figure S21. The  $^1\text{H NMR}$  spectrum of N-ethyl-2-oxo-N-(p-tolyl)propanamide.

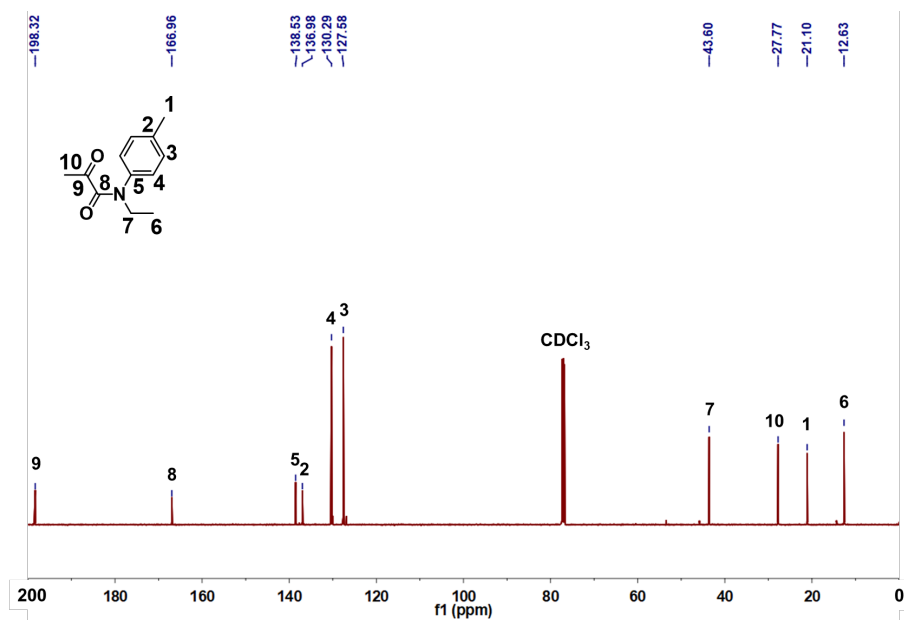

Figure S22. The  $^{13}\text{C NMR}$  spectrum of N-ethyl-2-oxo-N-(p-tolyl)propanamide.

S 2.2.3 Intermediate 5

$^1\text{H NMR}$  (500 MHz,  $\text{CDCl}_3$ )  $\delta$  1.86 (s, 4H), 1.15 (s, 12H);  $^{13}\text{C NMR}$  (125 MHz,  $\text{CDCl}_3$ )  $\delta$  207.40, 48.68, 34.67, 22.96.

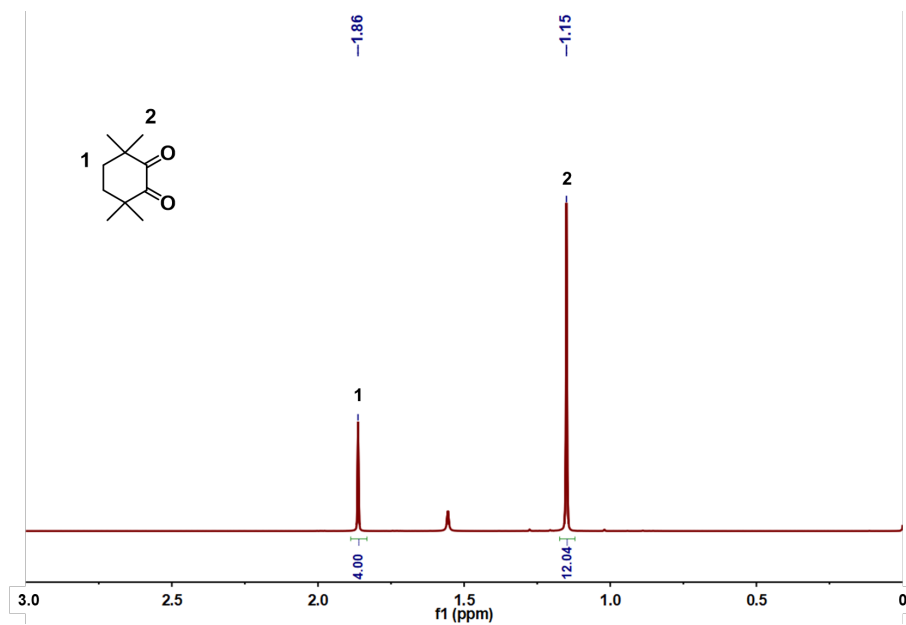

Figure S23. The  $^1\text{H NMR}$  spectrum of 3,3,6,6-tetramethylcyclohexane-1,2-dione.

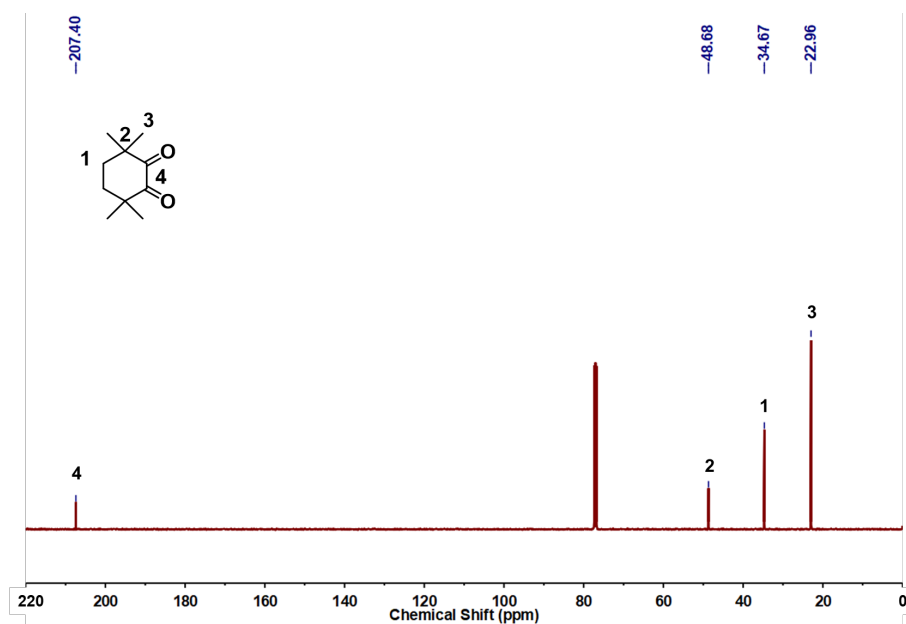

Figure S24. The  $^{13}\text{C NMR}$  spectrum of 3,3,6,6-tetramethylcyclohexane-1,2-dione.

### S 2.2.4 L1 extractant

$^1\text{H NMR}$  (500 MHz, Methanol- $d_4$ )  $\delta$  8.33 (d,  $J = 8.0$  Hz, 1H), 7.88 (t,  $J = 8.0$  Hz, 1H), 7.51 (d,  $J = 8.0$  Hz, 2H), 7.11 (d,  $J = 8.5$  Hz, 2H), 7.00 (d,  $J = 8.0$  Hz, 2H), 4.02 (q,  $J = 7.0$  Hz, 2H), 2.16 (s, 3H), 1.91 (s, 4H), 1.50 (s, 6H), 1.44 (s, 6H), 1.26 (t,  $J = 7.0$  Hz, 3H). **ESI-HRMS:**  $[\text{C}_{26}\text{H}_{31}\text{N}_5\text{O}+\text{H}]^+$  Theoretical value:  $m/z = 430.2601$ , Actual value:  $m/z = 430.2607$ ;  $[\text{C}_{26}\text{H}_{31}\text{N}_5\text{O}+\text{Na}]^+$  Theoretical value:  $m/z = 452.2421$ , Actual value:  $m/z = 452.2462$ ;  $[2\text{C}_{26}\text{H}_{31}\text{N}_5\text{O}+\text{Na}]^+$  Theoretical value:  $m/z = 881.4949$ , Actual value:  $m/z = 881.4958$ . **Organic element analysis:**  $\text{C}_{26}\text{H}_{31}\text{N}_5\text{O}$  Theoretical value: C = 72.70%, H = 7.27%, N = 16.30%; Actual value: C = 72.56%, H = 7.30%, N = 16.44%.

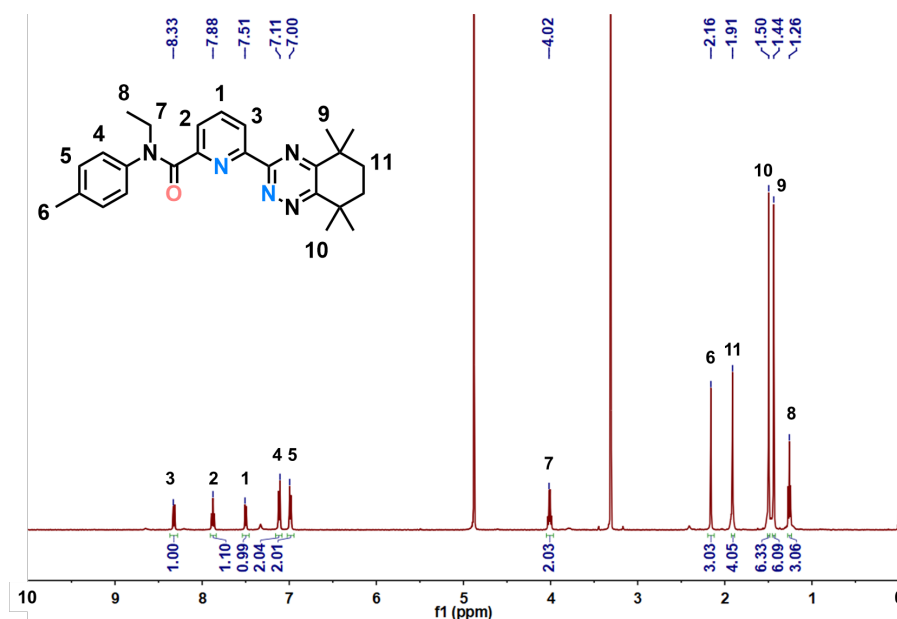

Figure S25. The  $^1\text{H NMR}$  spectrum of L1 extractant.

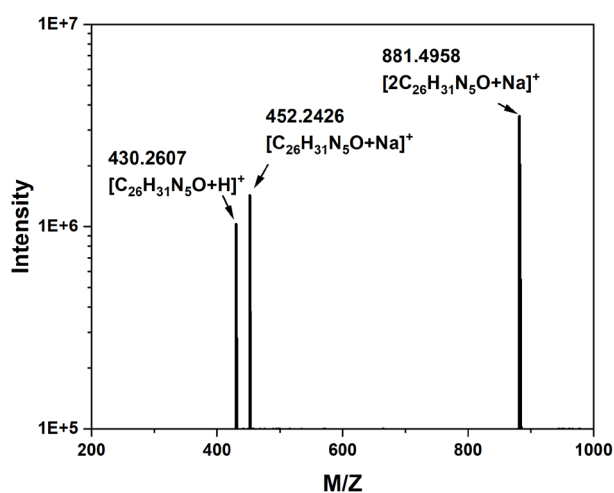

Figure S26. The ESI-MS result of L1 extractant.

### S 2.2.5 L2 extractant

**<sup>1</sup>H NMR** (500 MHz, Methanol-d<sub>4</sub>) δ 8.62 (d, J = 8.0 Hz, 1H), 8.46 (d, J = 7.5 Hz, 1H), 8.06 (m, 2H), 7.90 (t, J = 8.0 Hz, 1H), 7.64 (d, J = 7.5 Hz, 1H), 7.08 (s, 4H), 4.05 (q, J = 7.0 Hz, 2 h), 2.20 (s, 3H), 1.93 (s, 4H), 1.51 (s, 6H), 1.47 (s, 6H), 1.27 (t, J = 7.0 Hz, 3H). **ESI-HRMS:** [C<sub>33</sub>H<sub>34</sub>N<sub>6</sub>O+H]<sup>+</sup> Theoretical value: m/z = 507.2867, Actual value: m/z = 507.2867; [C<sub>33</sub>H<sub>34</sub>N<sub>6</sub>O+Na]<sup>+</sup> Theoretical value: m/z = 529.2686, Actual value: m/z = 529.2683; [2 C<sub>33</sub>H<sub>34</sub>N<sub>6</sub>O+Na]<sup>+</sup> Theoretical value: m/z = 1035.5480, Actual value: m/z = 1035.5464. **Organic element analysis:** C<sub>33</sub>H<sub>34</sub>N<sub>6</sub>O Theoretical value: C = 73.49%, H = 6.76%, N = 16.59%; Actual value: C = 73.44%, H = 6.74%, N = 16.72%.

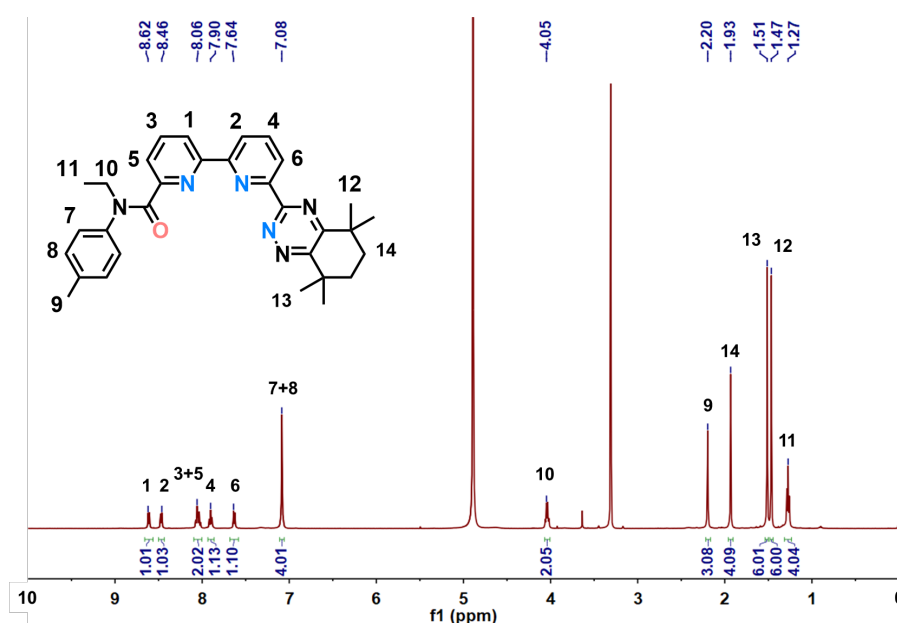

Figure S27. The <sup>1</sup>H NMR spectrum of L2 extractant.

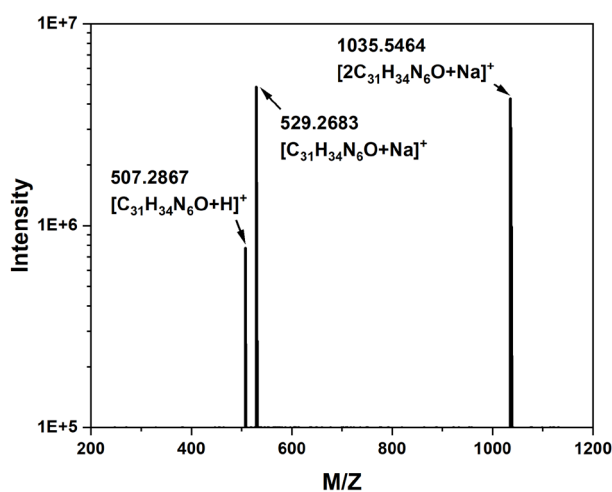

Figure S28. The ESI-MS result of L2 extractant.

### S 2.2.6 L3 extractant

$^1\text{H NMR}$  (500 MHz, Methanol- $d_4$ )  $\delta$  8.82 (d,  $J = 8.5\text{ Hz}$ , 1H), 8.71 (d,  $J = 8.0\text{ Hz}$ , 1H), 8.23 (d,  $J = 7.5\text{ Hz}$ , 1H), 8.10 (d,  $J = 8.5\text{ Hz}$ , 1H), 8.00 (d,  $J = 8.5\text{ Hz}$ , 1H), 7.39 (d,  $J = 7.5\text{ Hz}$ , 1H), 7.14 (d,  $J = 8.0\text{ Hz}$ , 2H), 6.94 (d,  $J = 7.0\text{ Hz}$ , 2H), 3.81 (q,  $J = 7.0\text{ Hz}$ , 2H), 2.19 (s, 3H), 1.79 (d,  $J = 25\text{ Hz}$ , 4H), 1.40 (s, 6H), 0.90 (s, 9H). **ESI-HRMS:**  $[\text{C}_{33}\text{H}_{34}\text{N}_6\text{O}+\text{H}]^+$  Theoretical value:  $m/z = 531.2867$ ; Actual value: 531.2871;  $[\text{C}_{33}\text{H}_{34}\text{N}_6\text{O}+\text{Na}]^+$  Theoretical value:  $m/z = 553.2686$ ; Actual value: 553.2688;  $[2\text{C}_{33}\text{H}_{34}\text{N}_6\text{O}+\text{Na}]^+$  Theoretical value:  $m/z = 1083.5480$ ; Actual value: 1083.5482. **Organic element analysis:**  $\text{C}_{31}\text{H}_{34}\text{N}_6\text{O}$  Theoretical value: C = 73.49%, H = 6.76%, N = 16.59%; Actual value: C = 74.64%, H = 6.15%, N = 15.82%.

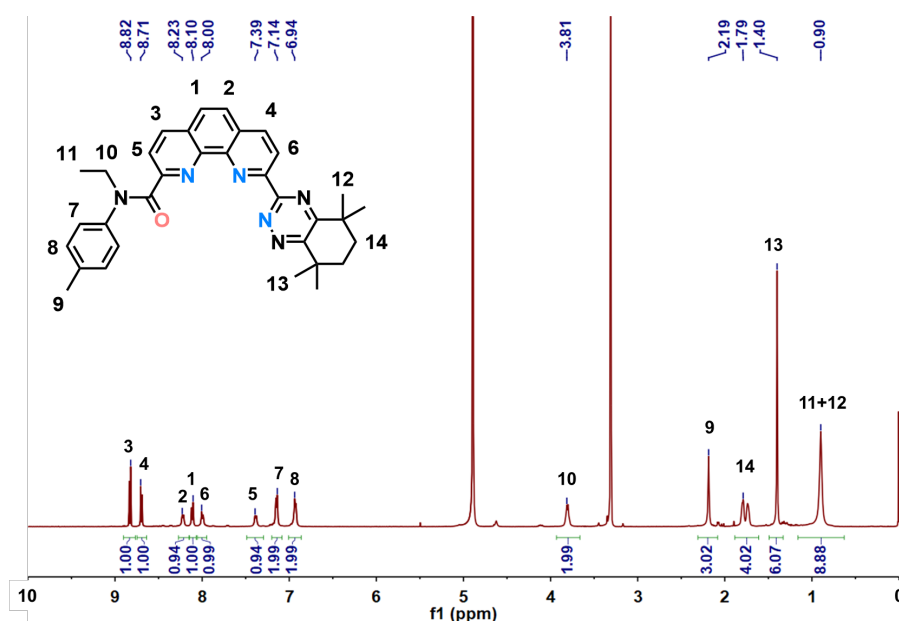

Figure S29. The  $^1\text{H NMR}$  spectrum of L3 extractant.

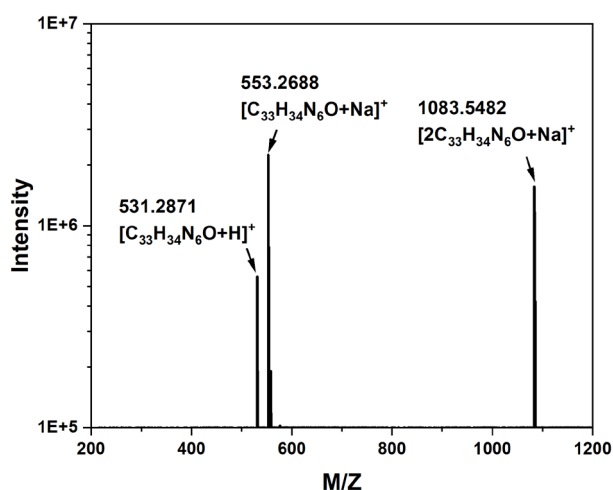

Figure S30. ESI-MS spectrum of L3 extractant.

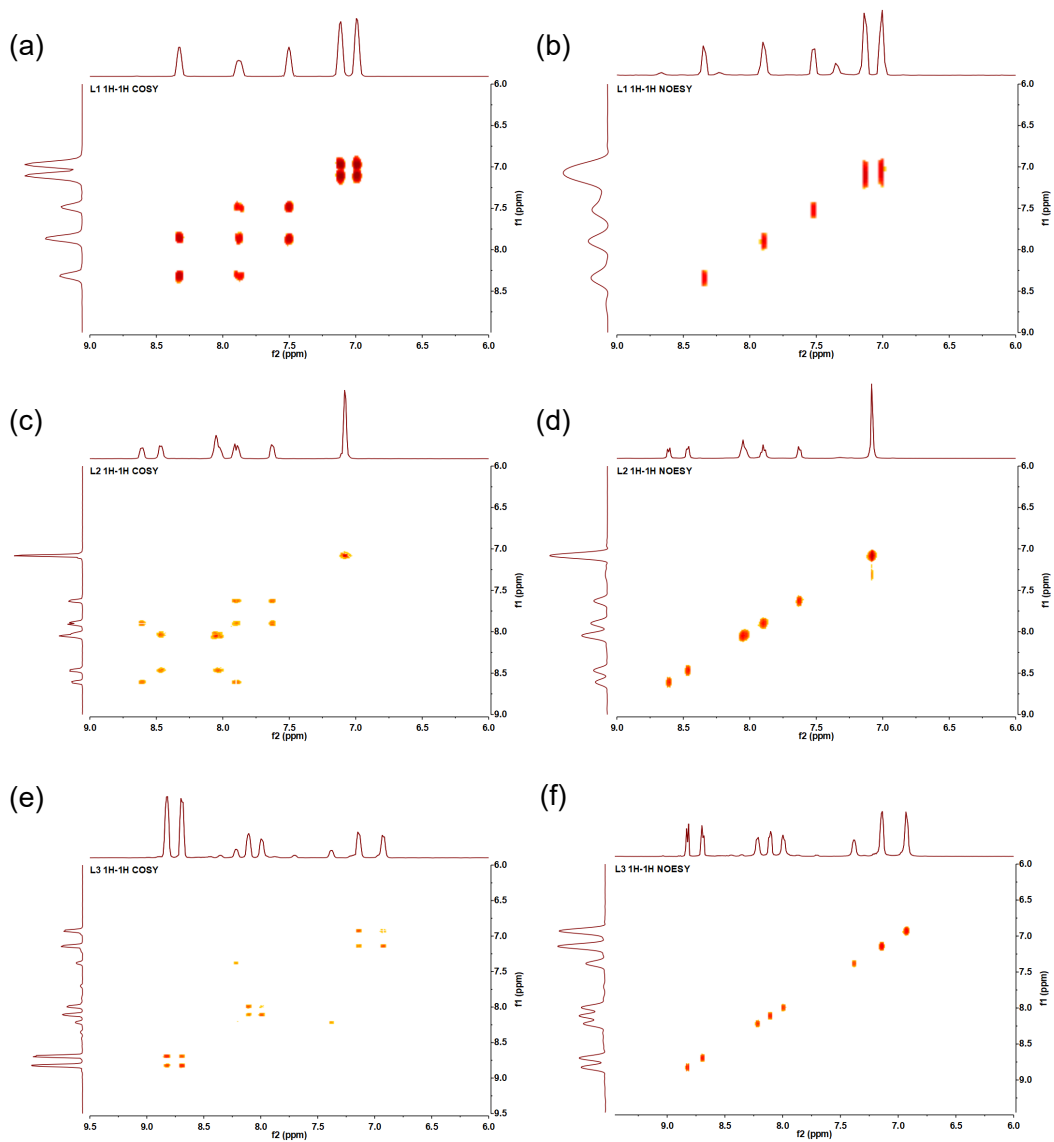

**Figure S31.** <sup>1</sup>H-<sup>1</sup>H COSY spectrum of (a) **L1**, (c) **L2**, and (e) **L3**; <sup>1</sup>H-<sup>1</sup>H NOESY spectrum of (b) **L1**, (d) **L2**, and (f) **L3**.



**Table S8.** Organic elements analysis of **L1**, **L2**, and **L3** extractants.

| Extractant | Chemical formula   | Element    | C (%)  | H(%)  | N(%)  |
|------------|--------------------|------------|--------|-------|-------|
| <b>L1</b>  | $C_{26}H_{31}N_5O$ | Prediction | 72.70  | 7.27  | 16.30 |
|            |                    | Measured   | 72.56  | 7.23  | 16.44 |
|            |                    | Deviation  | -0.136 | 0.03  | 0.14  |
| <b>L2</b>  | $C_{31}H_{34}N_6O$ | Prediction | 73.49  | 6.76  | 16.59 |
|            |                    | Measured   | 73.44  | 6.74  | 16.72 |
|            |                    | Deviation  | -0.05  | -0.02 | 0.13  |
| <b>L3</b>  | $C_{33}H_{34}N_6O$ | Prediction | 74.69  | 6.46  | 15.84 |
|            |                    | Measured   | 74.64  | 6.15  | 15.82 |
|            |                    | Deviation  | -0.05  | -0.31 | -0.02 |

## S 2.3 Extraction and Separation Performance

**Table S9.** The influence of solution acidity on the Ln(III) extraction by **L3** ( $[HNO_3] = 0.1-4.0$  M,  $[L] = 20$  mM).

| Ln Acidity | La   | Ce   | Pr   | Nd   | Sm   | Eu   | Gd   | Tb   | Dy   | Ho   | Er   | Tm   | Yb   | Lu   |
|------------|------|------|------|------|------|------|------|------|------|------|------|------|------|------|
| 0.1        | 0.04 | 0.04 | 0.04 | 0.04 | 0.04 | 0.04 | 0.02 | 0.02 | 0.03 | 0.01 | 0.01 | 0.01 | 0.00 | 0.00 |
| 0.5        | 0.13 | 0.11 | 0.13 | 0.14 | 0.15 | 0.13 | 0.08 | 0.08 | 0.10 | 0.06 | 0.06 | 0.05 | 0.04 | 0.03 |
| 1.0        | 0.18 | 0.12 | 0.14 | 0.16 | 0.19 | 0.17 | 0.10 | 0.11 | 0.12 | 0.08 | 0.07 | 0.05 | 0.05 | 0.03 |
| 2.0        | 0.16 | 0.09 | 0.10 | 0.12 | 0.16 | 0.14 | 0.08 | 0.10 | 0.10 | 0.08 | 0.07 | 0.05 | 0.04 | 0.03 |
| 3.0        | 0.08 | 0.08 | 0.08 | 0.11 | 0.13 | 0.13 | 0.08 | 0.10 | 0.10 | 0.08 | 0.08 | 0.06 | 0.05 | 0.04 |
| 4.0        | 0.07 | 0.06 | 0.06 | 0.08 | 0.11 | 0.11 | 0.07 | 0.09 | 0.08 | 0.08 | 0.07 | 0.06 | 0.06 | 0.05 |

## S 2.4 Coordination Modes in Solution

### S 2.4.1 $^1H$ NMR titration spectra

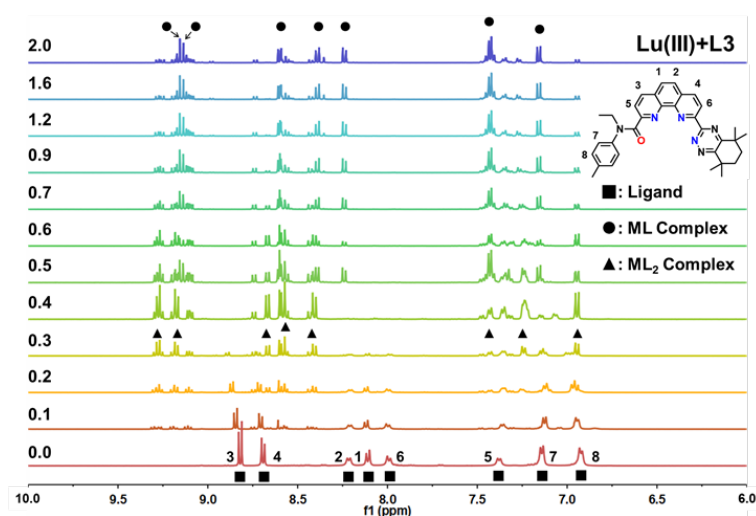**Figure S32.** Stacked  $^1H$  NMR titration spectra of Lu(III) and **L3** (■ = ligand peaks; ● = 1:1 complex peaks; ▲ = 1:2 complex peaks).

▲ = 1:2 complex peaks).

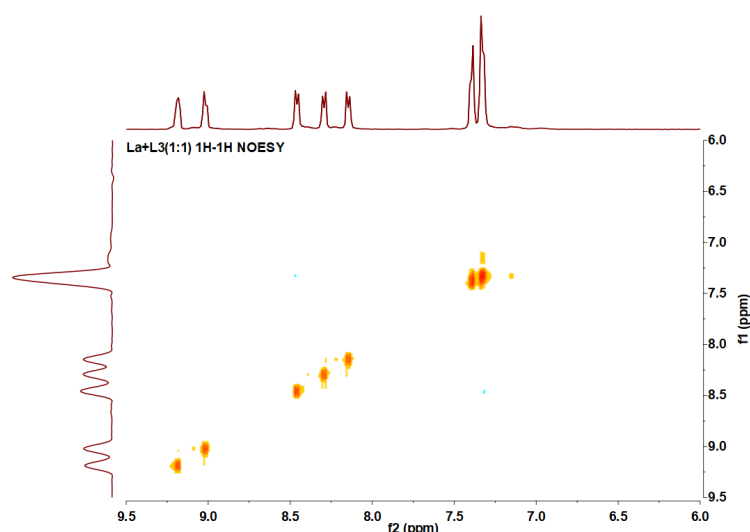

Figure S33.  $^1\text{H}$ - $^1\text{H}$  NOESY NMR spectra of La(III) and L3 complex.

#### S 2.4.2 ESI-MS spectrum

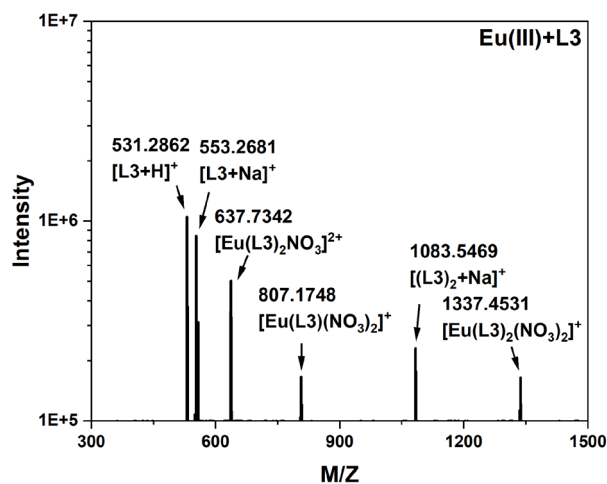

Figure S34. ESI-MS result of Eu(III) and L3 complex.

#### S 2.4.3 Simulated UV-vis spectra of L3 and its Eu complexes

In all tables within this part, the HOMO and LUMO are denoted as H and L, respectively. Alpha and beta orbitals are labelled with subscripts  $\alpha$  and  $\beta$ , respectively.

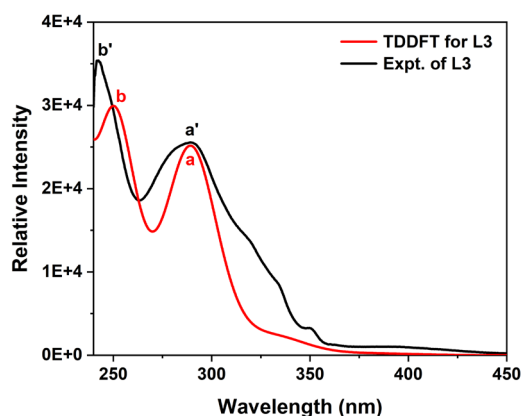

**Figure S35.** TDDFT/PBE0 simulated and experimental UV-vis spectra of **L3**. The calculated spectrum was blue-shifted by  $2,229\text{ cm}^{-1}$  to align with the experimental absorption peaks at  $34,578\text{ cm}^{-1}$  (289 nm), labelled as a'.

**Table S10.** Selected electronic excitations of **L3**, along with the oscillator strengths and transition types of the main absorption peaks. The analysis was based on the data from the peaks after the shift.

| Peak | Energy at Peak maximum(nm) | Transition Energy(nm) | Oscillator Strength | Dominant Contributions |            | Assignment                              |
|------|----------------------------|-----------------------|---------------------|------------------------|------------|-----------------------------------------|
|      |                            |                       |                     | Occupied               | Unoccupied |                                         |
| a    | 289.2                      | 291.8                 | 2.0E-01             | H-3                    | L          | Ligand $\pi \rightarrow$ Ligand $\pi^*$ |
|      |                            | 290.3                 | 3.4E-02             | H-4                    | L          | Ligand $\pi \rightarrow$ Ligand $\pi^*$ |
|      |                            | 287.2                 | 9.5E-02             | H-5                    | L          | Ligand $\pi \rightarrow$ Ligand $\pi^*$ |
|      |                            | 280.0                 | 1.4E-02             | H-1                    | L+2        | Ligand N2p $\rightarrow$ Ligand $\pi^*$ |
| b    | 250.1                      | 249.8                 | 8.9E-02             | H-4                    | L+2        | Ligand $\pi \rightarrow$ Ligand $\pi^*$ |
|      |                            | 246.1                 | 1.1E-02             | H-3                    | L+3        | Ligand $\pi \rightarrow$ Ligand $\pi^*$ |

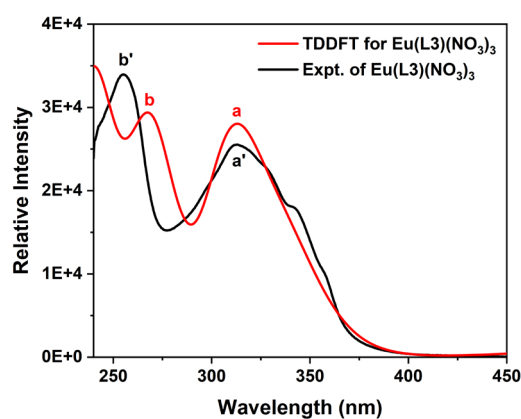

**Figure S36.** TDDFT/PBE0 simulated and experimental UV-vis spectra of  $\text{Eu}(\text{L3})(\text{NO}_3)_3$ . The calculated spectrum was blue-shifted by  $670\text{ cm}^{-1}$  to align with the experimental absorption peaks at  $31,949\text{ cm}^{-1}$  (313nm), labelled as a'.

**Table S11.** Selected electronic excitations of  $\text{Eu}(\text{L3})(\text{NO}_3)_3$ , along with the oscillator strengths and transition types of the main absorption peaks. The analysis was based on the data from the peaks after the shift.

| Peak | Energy at Peak maximum(nm) | Transition Energy(nm) | Oscillator Strength | Dominant Contributions |               | Assignment                                                                   |
|------|----------------------------|-----------------------|---------------------|------------------------|---------------|------------------------------------------------------------------------------|
|      |                            |                       |                     | Occupied               | Unoccupied    |                                                                              |
| a    | 313.0                      | 346.3                 | 1.3E-02             | H $\alpha$ -6          | L $\alpha$    | Ligand $\pi \rightarrow$ Eu 4f                                               |
|      |                            | 336.1                 | 1.4E-01             | H $\alpha$ -3          | L $\alpha$ +1 | Ligand $\pi + \text{NO}_3^- \text{O}2\text{p} \rightarrow$<br>Ligand $\pi^*$ |
|      |                            | 316.2                 | 1.1E-01             | H $\alpha$ -5          | L $\alpha$ +1 | Ligand $\pi \rightarrow$ Ligand $\pi^*$                                      |
|      |                            | 308.9                 | 2.3E-01             | H $\beta$ -3           | L $\beta$ +1  | Ligand $\pi + \text{NO}_3^- \text{O}2\text{p} \rightarrow$<br>Ligand $\pi^*$ |
| b    | 267.4                      | 269.6                 | 9.4E-02             | H $\beta$ -13          | L $\beta$     | $\text{NO}_3^- \text{O}2\text{p} \rightarrow$ Ligand $\pi^*$                 |
|      |                            | 259.1                 | 5.9E-03             | H $\alpha$ -23         | L $\alpha$    | Ligand $\pi \rightarrow$ Eu 4f                                               |

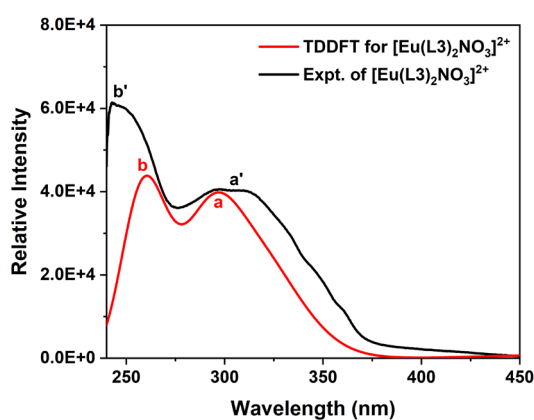

**Figure S37.** TDDFT/PBE0 simulated and experimental UV-vis spectra of  $[\text{Eu}(\text{L3})_2\text{NO}_3]^{2+}$ . The calculated spectrum was blue-shifted by  $3,491 \text{ cm}^{-1}$  to align with the experimental absorption peaks at  $33,670 \text{ cm}^{-1}$  (297 nm), labelled as 'a'.

**Table S12.** Selected electronic excitations of  $[\text{Eu}(\text{L3})_2\text{NO}_3]^{2+}$ , along with the oscillator strengths and transition types of the main absorption peaks. The analysis was based on the data from the peaks after the shift.

| Peak | Energy at Peak maximum(nm) | Transition Energy(nm) | Oscillator Strength | Dominant Contributions |               | Assignment                                                          |
|------|----------------------------|-----------------------|---------------------|------------------------|---------------|---------------------------------------------------------------------|
|      |                            |                       |                     | Occupied               | Unoccupied    |                                                                     |
| a    | 297.0                      | 305.9                 | 9.0E-02             | H $\beta$ -3           | L $\beta$     | Ligand $\pi + \text{N}2\text{p} \rightarrow$<br>Ligand $\pi^*$      |
|      |                            | 305.4                 | 2.7E-02             | H $\alpha$ -15         | L $\alpha$    | Ligand $\pi + \text{NO}_3^- \text{O}2\text{p} \rightarrow$<br>Eu 4f |
|      |                            | 300.9                 | 7.1E-02             | H $\beta$ -4           | L $\beta$     | Ligand $\pi \rightarrow$ Ligand $\pi^*$                             |
|      |                            | 297.1                 | 8.5E-02             | H $\beta$ -5           | L $\beta$     | Ligand $\pi + \text{N}2\text{p} \rightarrow$<br>Ligand $\pi^*$      |
|      |                            | 294.3                 | 9.9E-02             | H $\alpha$ -1          | L $\alpha$ +3 | Ligand $\pi \rightarrow$ Ligand $\pi^*$                             |
| b    | 260.5                      | 262.8                 | 4.9E-02             | H $\alpha$ -29         | L $\alpha$    | Ligand $\pi + \text{N}2\text{p} \rightarrow$ Eu 4f                  |
|      |                            | 262.5                 | 6.7E-02             | H $\beta$ -6           | L $\beta$ +2  | Ligand $\pi \rightarrow$ Ligand $\pi^*$                             |

S 2.4.4 Theoretically predicted UV-vis spectra of Am complexes

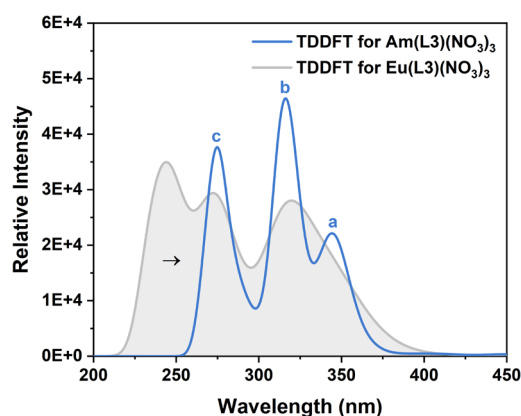

**Figure S38.** TDDFT/PBE0 simulated UV-vis spectra of Am(L3)(NO<sub>3</sub>)<sub>3</sub> and Eu(L3)(NO<sub>3</sub>)<sub>3</sub> complexes.

**Table S13.** Selected electronic excitations of Am(L3)(NO<sub>3</sub>)<sub>3</sub>, along with the oscillator strengths and transition types of the main absorption peaks.

| Peak | Energy at Peak maximum(nm) | Transition Energy(nm) | Oscillator Strength | Dominant Contributions |            | Assignment                                              |
|------|----------------------------|-----------------------|---------------------|------------------------|------------|---------------------------------------------------------|
|      |                            |                       |                     | Occupied               | Unoccupied |                                                         |
| a    | 344.2                      | 353.0                 | 2.8E-02             | Hβ-1                   | Lβ         | Ligand π + NO <sub>3</sub> <sup>-</sup> O2p → Ligand π* |
|      |                            | 346.9                 | 4.9E-02             | Hα-7                   | Lα         | Ligand π + Am 5f → Ligand π*                            |
|      |                            | 341.9                 | 5.3E-02             | Hβ-3                   | Lβ         | NO <sub>3</sub> <sup>-</sup> O2p → Ligand π*            |
| b    | 316.2                      | 314.8                 | 1.9E-01             | Hβ-3                   | Lβ+1       | NO <sub>3</sub> <sup>-</sup> O2p → Ligand π*            |
|      |                            | 313.8                 | 5.9E-02             | Hα-8                   | Lα+1       | NO <sub>3</sub> <sup>-</sup> O2p + Am 5f → Ligand π*    |
| c    | 274.8                      | 275.5                 | 9.0E-02             | Hα-12                  | Lα+1       | Ligand π → Ligand π*                                    |
|      |                            | 271.8                 | 3.4E-02             | Hα-11                  | Lα+2       | Ligand π → Ligand π*                                    |

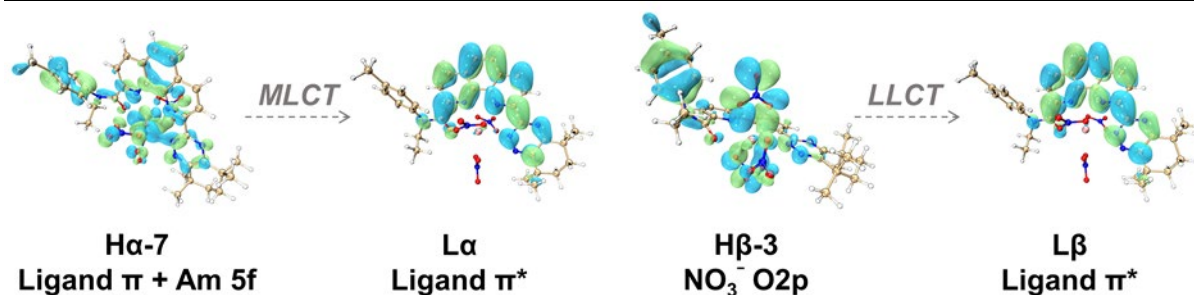

**Figure S39.** Dominant orbital character of Am(L3)(NO<sub>3</sub>)<sub>3</sub> associated with electronic transitions. The contour value is 0.02 a.u.

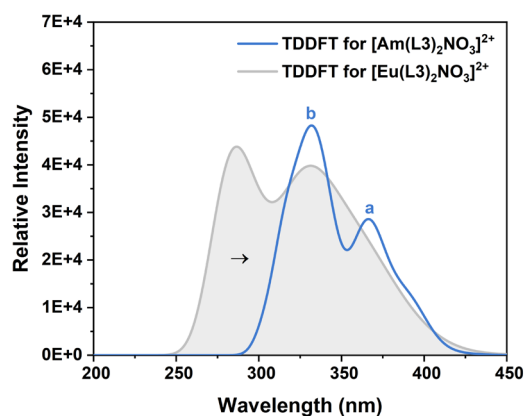

**Figure S40.** TDDFT/PBE0 simulated UV-vis spectra of  $[\text{Am}(\text{L3})_2\text{NO}_3]^{2+}$  and  $[\text{Eu}(\text{L3})_2\text{NO}_3]^{2+}$  complexes.

**Table S14.** Selected electronic excitations of  $[\text{Am}(\text{L3})_2\text{NO}_3]^{2+}$ , along with the oscillator strengths and transition types of the main absorption peaks.

| Peak | Energy at Peak maximum(nm) | Transition Energy(nm) | Oscillator Strength | Dominant Contributions |               | Assignment                                            |
|------|----------------------------|-----------------------|---------------------|------------------------|---------------|-------------------------------------------------------|
|      |                            |                       |                     | Occupied               | Unoccupied    |                                                       |
| a    | 366.2                      | 365.5                 | 4.6E-02             | H $\alpha$ -4          | L $\alpha$ +2 | Am 5f $\rightarrow$ Ligand $\pi^*$                    |
|      |                            | 364.3                 | 3.0E-02             | H $\alpha$             | L $\alpha$ +3 | Ligand $\pi \rightarrow$ Ligand $\pi^*$               |
|      |                            | 341.2                 | 1.1E-01             | H $\beta$ -3           | L $\beta$     | Ligand $\pi \rightarrow$ Ligand $\pi^*$               |
|      |                            | 336.8                 | 5.1E-02             | H $\beta$ -1           | L $\beta$ +2  | Ligand $\pi \rightarrow$ Ligand $\pi^*$               |
| b    | 331.9                      | 328.9                 | 1.1E-02             | H $\alpha$ -9          | L $\alpha$    | NO $_3^-$ O2p + Am 5f $\rightarrow$<br>Ligand $\pi^*$ |
|      |                            | 320.8                 | 2.1E-02             | H $\alpha$ -8          | L $\alpha$ +1 | Ligand $\pi$ + Am 5f $\rightarrow$<br>Ligand $\pi^*$  |

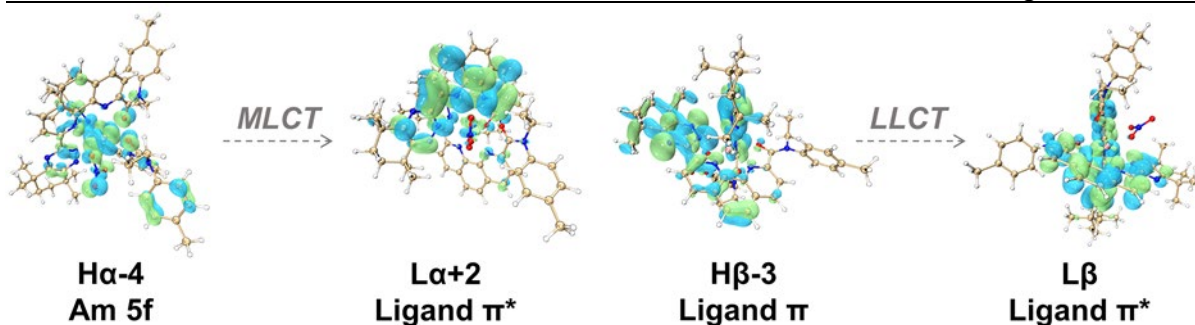

**Figure S41.** Dominant orbital character of  $[\text{Am}(\text{L3})_2\text{NO}_3]^{2+}$  associated with electronic transitions. The contour value is 0.02 a.u.

### S 2.4.5 Photoluminescence Spectra Titration

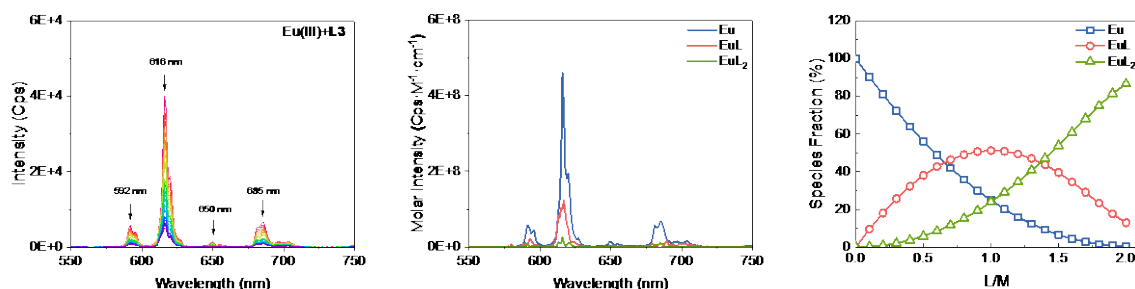

**Figure S42.** (a) Photoluminescence emission spectra of Eu(III) with **L3**; (b) Molar photoluminescence intensity of ligands and complexes of Eu(III) with **L3**; (c) Species fraction with increasing equivalents of Eu(III) with **L3** during photoluminescence titration.

**Table S15.** Complex reactions and fitted stability constants ( $\log \beta$ ) of **L3** with Eu(III) during UV-vis titration and photoluminescence titration.

| Methods                     | Reaction                                                              | $\log \beta$ | Standard deviation | Ion                                                                   |
|-----------------------------|-----------------------------------------------------------------------|--------------|--------------------|-----------------------------------------------------------------------|
| UV-vis titration            | $\text{Eu}^{3+} + \text{L3} \rightarrow \text{Eu}(\text{L3})^{3+}$    | 6.41         | 0.02               | 0.01 M<br>Et <sub>4</sub> N <sup>+</sup> NO <sub>3</sub> <sup>-</sup> |
|                             | $\text{Eu}^{3+} + 2\text{L3} \rightarrow \text{Eu}(\text{L3})_2^{3+}$ | 11.73        | 0.05               |                                                                       |
| Photoluminescence titration | $\text{Eu}^{3+} + \text{L3} \rightarrow \text{Eu}(\text{L3})^{3+}$    | 6.61         | 0.03               | 0.01 M<br>Et <sub>4</sub> N <sup>+</sup> NO <sub>3</sub> <sup>-</sup> |
|                             | $\text{Eu}^{3+} + 2\text{L3} \rightarrow \text{Eu}(\text{L3})_2^{3+}$ | 11.87        | 0.06               |                                                                       |

## S 2.5 Complexes Structures in the Solid State

### S 2.5.1 Parameters of single crystals of **L3** complexes

**Table S16.** The average bond length of different ligands with Eu(III) in complexes

| Complex                                                                            | Coordination Bond                    | Average bond length (Å) <sup>a</sup> |
|------------------------------------------------------------------------------------|--------------------------------------|--------------------------------------|
| Eu( <b>L3</b> )(NO <sub>3</sub> ) <sub>3</sub>                                     | Eu-N(phen)                           | 2.56 (2.62)                          |
|                                                                                    | Eu-N(triazine)                       | 2.57 (2.57)                          |
|                                                                                    | Eu-O(amide)                          | 2.40 (2.46)                          |
|                                                                                    | Eu-O(NO <sub>3</sub> <sup>-</sup> )  | 2.51 (2.50)                          |
| [Eu( <b>L3</b> ) <sub>2</sub> (ClO <sub>4</sub> )](ClO <sub>4</sub> ) <sub>2</sub> | Eu-N(phen)                           | 2.53                                 |
|                                                                                    | Eu-N(triazine)                       | 2.57                                 |
|                                                                                    | Eu-O(amide)                          | 2.43                                 |
|                                                                                    | Eu-O(ClO <sub>4</sub> <sup>-</sup> ) | 2.53                                 |

<sup>a</sup> The numbers in parentheses represent the calculated bond lengths. The difference between the experimental bond lengths and the calculated bond lengths is within 3%.

**Table S17.** Crystal data and structure refinement for **L3** extractant.

| <b>Name</b>                                       | <b>L3</b>                                                     |
|---------------------------------------------------|---------------------------------------------------------------|
| <b>CCDC number</b>                                | 2348572                                                       |
| <b>Empirical formula</b>                          | C <sub>35</sub> H <sub>39</sub> N <sub>7</sub> O <sub>2</sub> |
| <b>Formula weight</b>                             | 589.73                                                        |
| <b>Temperature/K</b>                              | 170                                                           |
| <b>Crystal system</b>                             | monoclinic                                                    |
| <b>Space group</b>                                | P21/c                                                         |
| <b>a/Å</b>                                        | 12.6666(8)                                                    |
| <b>b/Å</b>                                        | 15.1869(11)                                                   |
| <b>c/Å</b>                                        | 17.3543(12)                                                   |
| <b>α/°</b>                                        | 90                                                            |
| <b>β/°</b>                                        | 104.941(4)                                                    |
| <b>γ/°</b>                                        | 90                                                            |
| <b>Volume/Å<sup>3</sup></b>                       | 3225.5(4)                                                     |
| <b>Z</b>                                          | 4                                                             |
| <b>ρ<sub>calc</sub>/cm<sup>3</sup></b>            | 1.214                                                         |
| <b>μ/mm<sup>-1</sup></b>                          | 0.619                                                         |
| <b>F(000)</b>                                     | 1256                                                          |
| <b>Crystal size/mm<sup>3</sup></b>                | 0.2 × 0.12 × 0.08                                             |
| <b>Radiation</b>                                  | CuKα (λ = 1.54178)                                            |
| <b>2θ range for data collection/°</b>             | 7.222 to 137.804                                              |
| <b>Index ranges</b>                               | -15 ≤ h ≤ 12, -18 ≤ k ≤ 16, -20 ≤ l ≤ 20                      |
| <b>Reflections collected</b>                      | 28945                                                         |
| <b>Independent reflections</b>                    | 5925 [R <sub>int</sub> = 0.0760, R <sub>sigma</sub> = 0.0568] |
| <b>Data/restraints/parameters</b>                 | 5925/18/407                                                   |
| <b>Goodness-of-fit on F<sup>2</sup></b>           | 1.09                                                          |
| <b>Final R indexes [I ≥ 2σ (I)]</b>               | R <sub>1</sub> = 0.0956, wR <sub>2</sub> = 0.2738             |
| <b>Final R indexes [all data]</b>                 | R <sub>1</sub> = 0.1121, wR <sub>2</sub> = 0.2911             |
| <b>Largest diff. peak/hole / e Å<sup>-3</sup></b> | 0.66/-0.39                                                    |



**Table S18.** Crystal data and structure refinement for Eu(L3)(NO3)3 and [Eu(L3)2(ClO4)](ClO4)2.

| Name                                              | Eu(L3)(NO3)3                                                      | [Eu(L3)2(ClO4)](ClO4)2                                                            |
|---------------------------------------------------|-------------------------------------------------------------------|-----------------------------------------------------------------------------------|
| <b>CCDC number</b>                                | 2348576                                                           | 2348577                                                                           |
| <b>Empirical formula</b>                          | C <sub>35</sub> H <sub>37</sub> EuN <sub>10</sub> O <sub>10</sub> | C <sub>74</sub> H <sub>84</sub> Cl <sub>3</sub> EuN <sub>14</sub> O <sub>15</sub> |
| <b>Formula weight</b>                             | 909.7                                                             | 1667.86                                                                           |
| <b>Temperature/K</b>                              | 299                                                               | 170.00                                                                            |
| <b>Crystal system</b>                             | triclinic                                                         | triclinic                                                                         |
| <b>Space group</b>                                | P-1                                                               | P-1                                                                               |
| <b>a/Å</b>                                        | 9.0104(2)                                                         | 16.0691(8)                                                                        |
| <b>b/Å</b>                                        | 12.6375(3)                                                        | 16.5029(7)                                                                        |
| <b>c/Å</b>                                        | 17.6430(5)                                                        | 16.9304(7)                                                                        |
| <b>α/°</b>                                        | 87.428(2)                                                         | 87.119(2)                                                                         |
| <b>β/°</b>                                        | 86.868(2)                                                         | 79.668(2)                                                                         |
| <b>γ/°</b>                                        | 72.633(2)                                                         | 62.539(2)                                                                         |
| <b>Volume/Å<sup>3</sup></b>                       | 1913.68(9)                                                        | 3916.5(3)                                                                         |
| <b>Z</b>                                          | 2                                                                 | 2                                                                                 |
| <b>ρ<sub>calc</sub>/cm<sup>3</sup></b>            | 1.579                                                             | 1.414                                                                             |
| <b>μ/mm<sup>-1</sup></b>                          | 12.326                                                            | 0.975                                                                             |
| <b>F(000)</b>                                     | 920                                                               | 1720.0                                                                            |
| <b>Crystal size/mm<sup>3</sup></b>                | 0.15 × 0.1 × 0.08                                                 | 0.23 × 0.1 × 0.07                                                                 |
| <b>Radiation</b>                                  | CuKα (λ = 1.54178)                                                | MoKα (λ = 0.71073)                                                                |
| <b>2θ range for data collection/°</b>             | 5.018 to 136.726                                                  | 4.09 to 55.07                                                                     |
| <b>Index ranges</b>                               | -9 ≤ h ≤ 10, -15 ≤ k ≤ 15, -20 ≤ l ≤ 21                           | -20 ≤ h ≤ 20, -21 ≤ k ≤ 21, -22 ≤ l ≤ 21                                          |
| <b>Reflections collected</b>                      | 22978                                                             | 74787                                                                             |
| <b>Independent reflections</b>                    | 6966 [R <sub>int</sub> = 0.0648, R <sub>sigma</sub> = 0.0601]     | 17912 [R <sub>int</sub> = 0.0553, R <sub>sigma</sub> = 0.0488]                    |
| <b>Data/restraints/parameters</b>                 | 6966/72/512                                                       | 17912/257/1064                                                                    |
| <b>Goodness-of-fit on F<sup>2</sup></b>           | 1.059                                                             | 1.118                                                                             |
| <b>Final R indexes [I ≥ 2σ (I)]</b>               | R <sub>1</sub> = 0.0377, wR <sub>2</sub> = 0.0854                 | R <sub>1</sub> = 0.0562, wR <sub>2</sub> = 0.1231                                 |
| <b>Final R indexes [all data]</b>                 | R <sub>1</sub> = 0.0531, wR <sub>2</sub> = 0.0936                 | R <sub>1</sub> = 0.0724, wR <sub>2</sub> = 0.1335                                 |
| <b>Largest diff. peak/hole / e Å<sup>-3</sup></b> | 0.60/-0.71                                                        | 1.16/-0.98                                                                        |

### S 2.5.2 The Most Stable Configuration of $ML_2$ -type Complexes Using DFT

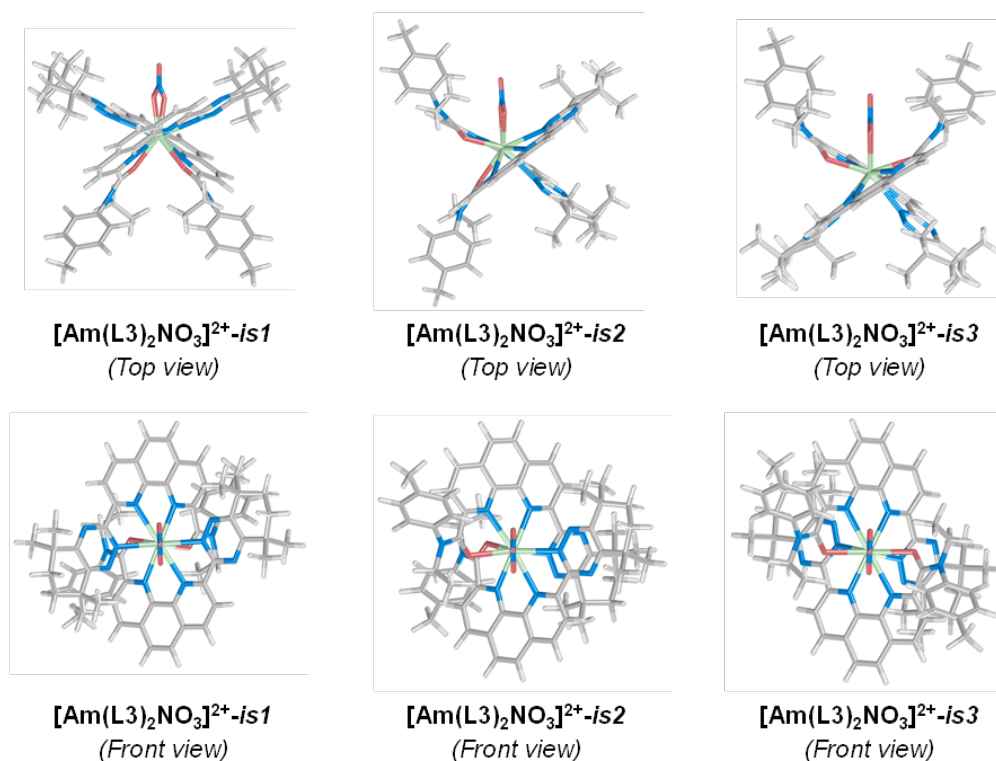

**Figure S43.** Optimized structures of three isomers of  $[Am(L3)_2NO_3]^{2+}$  complexes (top views and front views). For *is1*, the nitrate ion is adjacent to two triazine side chains. For *is2*, the nitrate ion is adjacent to one amide side chain and one triazine side chain. For *is3*, the nitrate ion is adjacent to two amide side chains.

**Table S19.** Relative energies (in kcal/mol) of various isomers in the  $[Am(L3)_2NO_3]^{2+}$  complexes.

| Isomer     | <i>is1</i> | <i>is2</i> | <i>is3</i> |
|------------|------------|------------|------------|
| $\Delta E$ | 4.48       | 0          | 8.80       |

Due to the very small energy difference between isomer 1 and isomer 2 (0.11 kcal/mol), we further calculated the UV-vis spectra using TDDFT method for the three isomers (**Figure S45**). The results show that the spectrum of isomer 2 is closest to the experimental spectrum. Additionally, the relative position of the nitrate ion in the isomer 2 aligns with the relative position of perchlorate ion in the crystal  $[Eu(L3)_2(ClO_4)](ClO_4)_2$ . Based on these facts, we identify the isomer 2 as the actual configuration during the extraction process of the Eu(III) complexes.

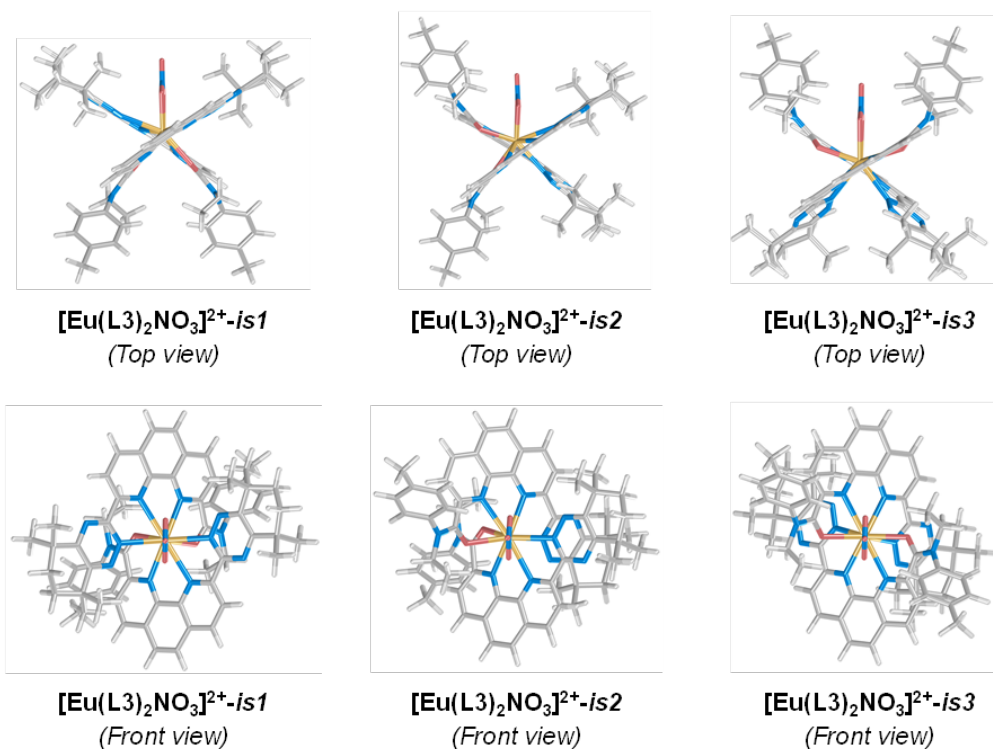

**Figure S44.** Optimized structures of  $[\text{Eu}(\text{L}3)_2\text{NO}_3]^{2+}$  complex (top views and front views). The meanings of *is1* -*is3* are the same as in  $[\text{Am}(\text{L}3)_2\text{NO}_3]^{2+}$  complex.

**Table S20.** Calculated relative Energies ( $\Delta E$  in kcal/mol) of various isomers in the  $[\text{Eu}(\text{L}3)_2\text{NO}_3]^{2+}$ .

| Isomer     | <i>Is1</i> | <i>Is2</i> | <i>Is3</i> |
|------------|------------|------------|------------|
| $\Delta E$ | 0          | 0.11       | 5.05       |

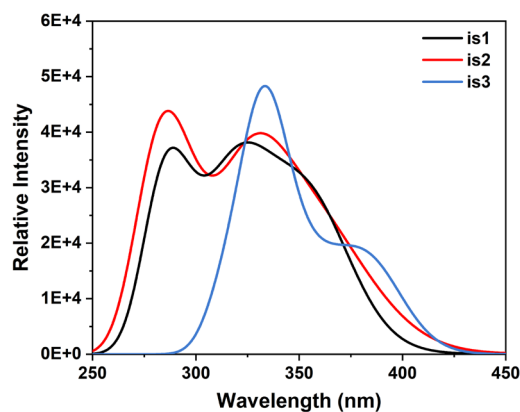

**Figure S45.** TDDFT/PBE0 simulated UV-vis spectra of three isomers of  $[\text{Eu}(\text{L}3)_2\text{NO}_3]^{2+}$ .

## Appendix A

The advantages, disadvantages, and process of actinide/lanthanide separation extractants

| Name                                        | Chemical structure                                                                  | Advantages                                                                                                            | Disadvantages                                      | Process and references |
|---------------------------------------------|-------------------------------------------------------------------------------------|-----------------------------------------------------------------------------------------------------------------------|----------------------------------------------------|------------------------|
| Neutral organophosphorus extractants (TBP)  | 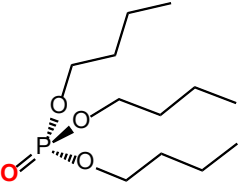   | High-valent actinides Extraction and separation.                                                                      | Lack An(III)/Ln(III) separation ability.           | PUREX [1]              |
| Acidic organophosphorus extractants (HDEHP) |    | Medium separation factor ( $SF_{Am(III)/Nd(III)} \approx 100$ ).                                                      | Hydrophilic masking agents (DTPA).                 | TALSPEAK [2, 3]        |
| HBTMPDTP                                    |   | High separation factor ( $SF_{Am(III)/Eu(III)} \approx 5900$ ).                                                       | Low and narrow acidity; Poor structural stability. | TRANSDA [4-6]          |
| BTP                                         |  | Higher extraction acidity and medium separation ability (1 M HNO <sub>3</sub> , $SF_{Am(III)/Eu(III)} \approx 150$ ). | Unsatisfied acidic and radio stability.            | SANEX [7, 8]           |
| BTBP                                        |  | Proved radiolysis resistance.                                                                                         | Slow extraction rate.                              | 1-cycle SANEX [9]      |
| BTPhen                                      |  | Good Am(III) extraction ability $D_{Am(III)} > 1000$ , $SF_{Am(III)/Eu(III)} > 200$ , $T_{Am(III)} \approx 15$ min).  | Difficult Am(III) stripping.                       | / [10]                 |
| DAPhen                                      |  | Good An(III/IV/VI)/Ln(III) separation ( $D_{Am(III)} \approx 20$ , $D_{U(VI)} > 100$ , $D_{Pu(IV)} > 300$ ).          | Light Ln(III) coextraction                         | GANEX [11, 12]         |

|        |                                                                                   |                                                                                                                                                   |                          |                           |
|--------|-----------------------------------------------------------------------------------|---------------------------------------------------------------------------------------------------------------------------------------------------|--------------------------|---------------------------|
| BLPhen | 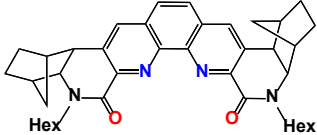 | Strong Am(III) extraction ( $D_{Am(III)} > 1000$ ).                                                                                               | All Ln(III) coextraction | / [13, 14]                |
| ATPhen |  | Good Am(III) extraction and stripping; all Ln(III) separation ( $D_{Am(III)} \approx 40$ , $SF_{Am(III)/Ln(III)} > 280$ , $S_{Am(III)} > 92\%$ ). | /                        | In preparing<br>This work |

## References:

- [1] Yang X, Xu L, Zhang A, et al. Organophosphorus Extractants: A Critical Choice for Actinides/Lanthanides Separation in Nuclear Fuel Cycle. *Chem. Eur. J.*, **2023**, 29, e202300456.
- [2] Nilsson M, Nash K. Review Article: A Review of the Development and Operational Characteristics of the TALSPEAK Process. *Solvent Extr. Ion Exc.*, **2007**, 25, 665-701.
- [3] Nash K. The Chemistry of TALSPEAK: A Review of the Science. *Solvent Extr. Ion Exc.*, **2014**, 33, 1-55.
- [4] Zhu Y, Chen J, Jiao R. Extraction of Am(III) and Eu(III) from Nitrate Solution with Purified Cyanex 301. *Solvent Extr. Ion Exc.*, **1996**, 14, 61-68.
- [5] Chen J, Jiao R, Zhu Y. A Study on the Radiolytic Stability of Commercial and Purified Cyanex 301. *Solvent Extr. Ion Exc.*, **1996**, 14, 555-565.
- [6] Zhu Y, Xu J, Chen J, et al. Extraction of americium and lanthanides by dialkyldithiophosphinic acid and f-f absorption spectra of the extraction complexes. *J. Alloy Compd.*, **1998**, 271-273, 742-745.
- [7] Kolarik Z, Müllich U, Gassner F. Selective Extraction of Am(III) over Eu(III) by 2,6-Ditriazolyl- and 2,6-Ditriazinylpyridines. *Solvent Extr. Ion Exc.*, **1999**, 17, 23-32.
- [8] Panak P, Geist A. Complexation and Extraction of Trivalent Actinides and Lanthanides by Triazinylpyridine N-Donor Ligands. *Chem. Rev.*, **2013**, 113, 1199-1236.
- [9] Geist A, Hill C, Modolo G, et al. 6,6'-Bis(5,5,8,8-tetramethyl-5,6,7,8-tetrahydro-benzo[1,2,4]triazin-3-yl) [2,2']bipyridine, an Effective Extracting Agent for the Separation of Americium(III) and Curium(III) from the Lanthanides. *Solvent Extr. Ion Exc.*, **2006**, 24, 463-483.
- [10] Lewis F, Harwood L, Hudson M, et al. Highly Efficient Separation of Actinides from Lanthanides by a Phenanthroline-Derived Bis-triazine Ligand. *J. Am. Chem. Soc.*, **2011**, 133, 13093-13102.
- [11] Xiao C, Wang C, Yuan L, et al. Excellent Selectivity for Actinides with a Tetradentate 2,9-Diamide-1,10-Phenanthroline Ligand in Highly Acidic Solution: A Hard-Soft Donor Combined Strategy. *Inorg. Chem.*, **2014**, 53, 1712-1720.
- [12] Yang X, Ren P, Yang Q, et al. Strong Periodic Tendency of Trivalent Lanthanides Coordinated with a Phenanthroline-Based Ligand: Cascade Countercurrent Extraction, Spectroscopy, and Crystallography. *Inorg. Chem.*, **2021**, 60, 9745-9756.

[13] Jansone-Popova S, Ivanov A, Bryantsev V, et al. Bis-lactam-1,10-phenanthroline (BLPhen), a New Type of Preorganized Mixed N,O-Donor Ligand That Separates Am(III) over Eu(III) with Exceptionally High Efficiency. *Inorg. Chem.*, **2017**, 56, 5911-5917.

[14] Healy M, Ivanov A, Karslyan Y, et al. Efficient Separation of Light Lanthanides(III) by Using Bis-Lactam Phenanthroline Ligands. *Chem. Eur. J.*, **2019**, 25, 6326-6331.

## Appendix B

Cartesian coordinates of PBE0 optimized geometries of ligands and metal complexes.

| Ligand 1-C1 |             |             |             | Ligand 1-C2 |             |             |             |
|-------------|-------------|-------------|-------------|-------------|-------------|-------------|-------------|
| N           | -1.58987000 | 1.16675800  | -0.28164600 | N           | -0.61632100 | -1.05313100 | -0.02603800 |
| N           | 0.70346400  | -0.07011900 | -1.10824000 | N           | 1.44949000  | 0.70658600  | -0.31288000 |
| N           | 1.78035900  | -0.76907100 | -1.36098000 | N           | 2.43402600  | 1.56920400  | -0.30040500 |
| N           | 1.94026100  | 1.34626200  | 0.31556500  | N           | 2.95519000  | -1.04553400 | 0.16609200  |
| C           | -0.34012900 | 2.93158500  | 0.72829600  | C           | 0.87038200  | -2.90486300 | -0.25886700 |
| C           | 0.80681700  | 0.94633200  | -0.25386900 | C           | 1.73751300  | -0.57221000 | -0.08175800 |
| C           | -1.50790000 | 3.62719000  | 0.99044000  | C           | -0.20595400 | -3.77544600 | -0.30346000 |
| C           | 2.94256200  | -0.46438200 | -0.79342400 | C           | 3.67968700  | 1.17890300  | -0.05418200 |
| C           | -0.42781800 | 1.70577400  | 0.07199400  | C           | 0.61594800  | -1.54441100 | -0.11848300 |
| C           | 3.03454500  | 0.65797200  | 0.04453800  | C           | 3.94892600  | -0.17590400 | 0.20284200  |
| C           | -4.01014800 | 1.27268400  | -0.50942500 | C           | -3.04500000 | -1.37627100 | 0.16260700  |
| C           | -2.70167600 | 1.83526200  | -0.01969800 | C           | -1.64126700 | -1.88918500 | -0.06262300 |
| H           | 0.62944900  | 3.31755400  | 1.01187200  | H           | 1.89148800  | -3.25470600 | -0.32836900 |
| H           | -1.47263600 | 4.58965200  | 1.48819100  | H           | -0.04434700 | -4.84154800 | -0.41549500 |
| C           | 4.26502100  | 0.78856400  | 2.17671700  | C           | 5.82337900  | -1.46311200 | -0.74599800 |
| H           | 5.16485600  | 1.15659600  | 2.67667200  | H           | 6.80490100  | -1.90286300 | -0.55063400 |
| H           | 4.19037700  | -0.28602500 | 2.35684200  | H           | 5.90978300  | -0.80951800 | -1.61665900 |
| H           | 3.39571900  | 1.26635500  | 2.63242600  | H           | 5.12931900  | -2.26745000 | -0.99735200 |
| C           | 4.47594500  | 2.63314200  | 0.51793000  | C           | 5.27927200  | -1.68295000 | 1.67437300  |
| H           | 4.47898900  | 2.91895800  | -0.53702400 | H           | 4.89604300  | -1.19392800 | 2.57353100  |
| H           | 5.42121700  | 2.95897700  | 0.95985700  | H           | 6.28502700  | -2.05177100 | 1.89196800  |
| H           | 3.66112100  | 3.16279200  | 1.01176000  | H           | 4.63605600  | -2.53425300 | 1.45171600  |
| C           | 4.51007100  | -1.08924400 | -2.59906100 | C           | 4.55854900  | 3.09433800  | 1.23079900  |
| H           | 5.32353300  | -1.75733800 | -2.89477600 | H           | 5.27892800  | 3.91668600  | 1.24466600  |
| H           | 4.84242200  | -0.05973000 | -2.75076400 | H           | 4.70681500  | 2.49606900  | 2.13271000  |
| H           | 3.65808100  | -1.26671500 | -3.25779500 | H           | 3.55199200  | 3.51499600  | 1.26965000  |
| C           | 3.70650900  | -2.82684100 | -1.00830200 | C           | 4.55041000  | 3.18448300  | -1.25686500 |
| H           | 4.55973200  | -3.46843500 | -1.24480300 | H           | 5.32772900  | 3.95337400  | -1.25390600 |
| H           | 2.88726200  | -3.06794500 | -1.68550600 | H           | 3.57541500  | 3.67061000  | -1.23565900 |
| H           | 3.38389300  | -3.05401300 | 0.01124700  | H           | 4.63077400  | 2.62490200  | -2.19245300 |
| C           | 4.32905200  | 1.12067300  | 0.68061100  | C           | 5.33543900  | -0.70926900 | 0.49779500  |
| C           | 4.11382500  | -1.35929400 | -1.14255100 | C           | 4.73414100  | 2.26645500  | -0.04836100 |
| C           | 5.28172100  | -1.06685000 | -0.19502500 | C           | 6.12733300  | 1.63111600  | -0.10134000 |
| C           | 5.51559900  | 0.41734000  | 0.01386300  | C           | 6.27644400  | 0.45037900  | 0.83905500  |
| H           | 6.18353200  | -1.54138500 | -0.59364900 | H           | 6.87089500  | 2.39894200  | 0.13275400  |
| H           | 5.08662200  | -1.54848200 | 0.76930100  | H           | 6.33365300  | 1.31295900  | -1.12900100 |
| H           | 5.71693800  | 0.89742000  | -0.94983000 | H           | 6.08345400  | 0.77211200  | 1.86803200  |
| H           | 6.40781400  | 0.58067300  | 0.62602500  | H           | 7.30606200  | 0.08010600  | 0.82564500  |
| C           | -2.71634200 | 3.08265000  | 0.59703700  | C           | -1.48659400 | -3.26830400 | -0.19244500 |
| H           | -3.65890000 | 3.59424600  | 0.74238400  | H           | -2.36238300 | -3.90329200 | -0.18357200 |

|                    |             |             |             |                    |             |             |             |
|--------------------|-------------|-------------|-------------|--------------------|-------------|-------------|-------------|
| O                  | -4.85960100 | 2.04007900  | -0.93281100 | O                  | -3.79695300 | -2.09336800 | 0.80033700  |
| C                  | -3.40733300 | -0.97693500 | 0.26322400  | C                  | -4.69705400 | 0.35329700  | -0.00120800 |
| C                  | -3.35015000 | -0.83911900 | 1.64276000  | C                  | -5.14207000 | 0.35395200  | 1.31884700  |
| C                  | -2.74718700 | -2.04242700 | -0.33770200 | C                  | -5.51181300 | 0.91382800  | -0.97658800 |
| C                  | -2.62204500 | -1.73956100 | 2.40639700  | C                  | -6.36972400 | 0.89971100  | 1.64070000  |
| H                  | -3.87881200 | -0.02093500 | 2.11927600  | H                  | -4.52199700 | -0.07853500 | 2.09182000  |
| C                  | -2.03935700 | -2.94495400 | 0.43333500  | C                  | -6.74016500 | 1.46438700  | -0.63942800 |
| H                  | -2.76074500 | -2.13862100 | -1.41640700 | H                  | -5.19490100 | 0.92186500  | -2.01219900 |
| H                  | -2.58053400 | -1.61122200 | 3.48333500  | H                  | -6.69181400 | 0.89204900  | 2.67744200  |
| C                  | -1.95918300 | -2.81019900 | 1.81871300  | C                  | -7.19677200 | 1.46511200  | 0.67126700  |
| H                  | -1.51705600 | -3.76196900 | -0.05421300 | H                  | -7.35674900 | 1.89637800  | -1.42117700 |
| C                  | -1.19380700 | -3.80119400 | 2.64277700  | C                  | -8.53097500 | 2.04134700  | 1.03693000  |
| H                  | -0.21086100 | -4.00211200 | 2.20960200  | H                  | -8.98631200 | 2.55666800  | 0.18974700  |
| H                  | -1.72194200 | -4.75786200 | 2.70104400  | H                  | -8.44382700 | 2.75621500  | 1.85937000  |
| H                  | -1.04775500 | -3.44163200 | 3.66257800  | H                  | -9.22337800 | 1.25911100  | 1.36210800  |
| C                  | -5.38546100 | -0.58662900 | -1.17015500 | C                  | -2.61737700 | 0.58542700  | -1.31976300 |
| C                  | -5.28392100 | -0.60420200 | -2.68389200 | C                  | -2.57563400 | -0.05375700 | -2.69693400 |
| H                  | -5.55585800 | -1.59071600 | -0.77994700 | H                  | -3.06450400 | 1.57750100  | -1.37853800 |
| H                  | -6.22432000 | 0.04427000  | -0.86495300 | H                  | -1.60795900 | 0.70756900  | -0.93099200 |
| H                  | -6.21632800 | -0.97717600 | -3.11485800 | H                  | -2.00207400 | 0.57944300  | -3.37823400 |
| H                  | -5.11176200 | 0.40239900  | -3.06637100 | H                  | -2.08836100 | -1.03069500 | -2.66644100 |
| H                  | -4.47062300 | -1.24959600 | -3.02208200 | H                  | -3.57429700 | -0.19161200 | -3.11725300 |
| N                  | -4.18019200 | -0.07563500 | -0.51614400 | N                  | -3.41409200 | -0.16037900 | -0.33639600 |
| <b>Ligand 1-C3</b> |             |             |             | <b>Ligand 2-C1</b> |             |             |             |
| N                  | -1.41154400 | 1.33642800  | -0.11264700 | C                  | -0.37121800 | -1.31904000 | -0.24014500 |
| N                  | 1.86140200  | 2.01785600  | 1.14709000  | N                  | 0.78894600  | -0.69892100 | -0.42089400 |
| N                  | 3.09184200  | 1.57872400  | 1.07451000  | C                  | 1.88384200  | -1.20848200 | 0.12947700  |
| N                  | 1.17885900  | 0.48643800  | -0.50938500 | C                  | 1.86548500  | -2.37216500 | 0.89505600  |
| C                  | -0.63665900 | 3.25282400  | 1.08666500  | C                  | 0.65475000  | -3.01867200 | 1.07797500  |
| C                  | 0.94598600  | 1.47286300  | 0.34724200  | C                  | -0.48743500 | -2.49249200 | 0.50518500  |
| C                  | -1.91883900 | 3.77228600  | 1.11444800  | C                  | -1.56032700 | -0.70747600 | -0.88227100 |
| C                  | 3.41113200  | 0.60581500  | 0.22933100  | N                  | -2.74003600 | -1.26715300 | -0.62312300 |
| C                  | -0.42575400 | 2.03576200  | 0.44120300  | C                  | -3.82534600 | -0.74171900 | -1.17355200 |
| C                  | 2.41373400  | 0.02357700  | -0.57213500 | C                  | -3.78869600 | 0.35951300  | -2.02032600 |
| C                  | -3.74001400 | 1.10072400  | -0.78060000 | C                  | -2.55704300 | 0.92665600  | -2.30326300 |
| C                  | -2.63672600 | 1.83856100  | -0.07022800 | C                  | -1.42051300 | 0.39434700  | -1.72449400 |
| H                  | 0.20014500  | 3.76546800  | 1.54114700  | H                  | 2.78456300  | -2.74601400 | 1.32456200  |
| H                  | -2.11421000 | 4.72444300  | 1.59445800  | H                  | 0.60479600  | -3.93092200 | 1.66190300  |
| C                  | 2.61788700  | -0.52149100 | -2.96363700 | H                  | -1.45825900 | -2.95806500 | 0.61066000  |
| H                  | 2.75399700  | -1.31965000 | -3.69818600 | H                  | -4.70293100 | 0.75511600  | -2.44505700 |
| H                  | 3.38931500  | 0.23299200  | -3.13341200 | H                  | -2.48556800 | 1.77909000  | -2.96946400 |
| H                  | 1.64609700  | -0.05462000 | -3.13418700 | H                  | -0.43273300 | 0.79911000  | -1.90225800 |
| C                  | 1.59500300  | -2.17111200 | -1.40539800 | N                  | 4.27689700  | 1.19022700  | -1.13189900 |



|   |             |             |             |   |             |             |             |
|---|-------------|-------------|-------------|---|-------------|-------------|-------------|
| H | 1.58677300  | -2.59390300 | -0.39731900 | N | 3.16055300  | 0.52975500  | -0.95809000 |
| H | 1.78447800  | -2.98226200 | -2.11369300 | C | 5.38237600  | 0.84851000  | -0.47923400 |
| H | 0.60897700  | -1.74995800 | -1.60129500 | C | 6.60882500  | 1.69592200  | -0.74831300 |
| C | 5.13894800  | -0.61538100 | 1.50389900  | C | 7.68930800  | 1.37717800  | 0.29010900  |
| H | 6.19232400  | -0.90564200 | 1.54504200  | C | 7.85292500  | -0.11077900 | 0.53568600  |
| H | 4.53270100  | -1.52182100 | 1.56812300  | C | 6.59373000  | -0.76263300 | 1.11586600  |
| H | 4.91489900  | 0.00028100  | 2.37707800  | C | 5.36999300  | -0.26664600 | 0.37358300  |
| C | 5.77584400  | 1.40059900  | 0.19034100  | N | 4.23575300  | -0.91574600 | 0.56315400  |
| H | 6.82067900  | 1.07950800  | 0.16236500  | C | 3.16375200  | -0.48711000 | -0.09786000 |
| H | 5.62358100  | 2.02341000  | 1.07158500  | C | 6.42375700  | -0.40385800 | 2.59754600  |
| H | 5.58563400  | 2.01254800  | -0.69520600 | H | 7.26840400  | -0.79310800 | 3.17216200  |
| C | 2.68073100  | -1.10492300 | -1.54614300 | H | 6.37190900  | 0.67542300  | 2.75643700  |
| C | 4.86324100  | 0.17439200  | 0.21859600  | H | 5.50562800  | -0.84522200 | 2.98987000  |
| C | 5.13188100  | -0.68596200 | -1.02050200 | C | 6.70017800  | -2.28159400 | 0.98600400  |
| C | 4.05345100  | -1.72417300 | -1.26676100 | H | 6.77692100  | -2.58437000 | -0.06139300 |
| H | 6.10668500  | -1.16976300 | -0.90554000 | H | 7.59554000  | -2.63171800 | 1.50635700  |
| H | 5.21934800  | -0.03126200 | -1.89436300 | H | 5.83067400  | -2.77563800 | 1.41973400  |
| H | 3.97427400  | -2.38627900 | -0.39776800 | C | 7.10482100  | 1.38837200  | -2.16635100 |
| H | 4.32700000  | -2.36442200 | -2.11101000 | H | 6.31318100  | 1.58748000  | -2.89096400 |
| C | -2.94196300 | 3.06597600  | 0.50880200  | H | 7.96353600  | 2.02100200  | -2.40701800 |
| H | -3.95709100 | 3.43903200  | 0.46546300  | H | 7.40787700  | 0.34491500  | -2.27917100 |
| O | -4.55079900 | 1.74007600  | -1.43016700 | C | 6.24742600  | 3.17915800  | -0.66515400 |
| C | -3.10705300 | -1.02905200 | 0.26300000  | H | 5.85639900  | 3.43440900  | 0.32323100  |
| C | -3.21576700 | -0.70606700 | 1.61070500  | H | 7.13982900  | 3.78525200  | -0.84368800 |
| C | -2.38842200 | -2.16288300 | -0.09710400 | H | 5.49187100  | 3.43948900  | -1.40618700 |
| C | -2.58743500 | -1.48172100 | 2.57055200  | H | 7.43831500  | 1.88052700  | 1.23008300  |
| H | -3.79758500 | 0.15878200  | 1.90820500  | H | 8.63562600  | 1.81353500  | -0.04374100 |
| C | -1.78316700 | -2.94430800 | 0.87171400  | H | 8.68807600  | -0.29518700 | 1.21834100  |
| H | -2.28608100 | -2.42149600 | -1.14434200 | H | 8.11196300  | -0.61257300 | -0.40286200 |
| H | -2.67649200 | -1.20434000 | 3.61611000  | C | -5.11319200 | -1.48585400 | -0.92278200 |
| C | -1.86402500 | -2.61808700 | 2.22266600  | O | -5.20283700 | -2.66107900 | -1.21420800 |
| H | -1.22063600 | -3.82160800 | 0.56811000  | N | -6.17256500 | -0.76677400 | -0.44011100 |
| C | -1.22283700 | -3.47895700 | 3.26873800  | C | -6.03136700 | 0.49106400  | 0.20007500  |
| H | -0.36212500 | -4.01758400 | 2.86775700  | C | -5.11298300 | 0.67429400  | 1.22740300  |
| H | -1.92667800 | -4.22597900 | 3.64954400  | C | -6.84136400 | 1.55913800  | -0.17346600 |
| H | -0.88571100 | -2.88578700 | 4.12099600  | C | -4.99045000 | 1.90929600  | 1.84415400  |
| C | -4.73296700 | -0.92897800 | -1.59949100 | H | -4.49157000 | -0.15633000 | 1.54140900  |
| C | -4.28818900 | -0.98651600 | -3.04892400 | C | -6.72307000 | 2.78326100  | 0.46100100  |
| H | -4.88482000 | -1.93110300 | -1.19729700 | H | -7.56157600 | 1.43123900  | -0.97406100 |
| H | -5.67964200 | -0.38755100 | -1.52795200 | H | -4.26360900 | 2.03230000  | 2.64052900  |
| H | -5.05278800 | -1.48109600 | -3.65292800 | H | -7.36454100 | 3.60345200  | 0.15459900  |
| H | -4.14268400 | 0.01952500  | -3.44362000 | C | -5.63975900 | 4.32502500  | 2.13104700  |
| H | -3.35440200 | -1.54187500 | -3.16026100 | H | -6.59717600 | 4.84510100  | 2.20069800  |
| N | -3.77023000 | -0.25961900 | -0.72358700 | H | -4.96125400 | 4.96617300  | 1.55946200  |

|                    |             |             |             |             |
|--------------------|-------------|-------------|-------------|-------------|
|                    | H           | -5.22887400 | 4.23103500  | 3.13770500  |
|                    | C           | -5.79015400 | 2.98586800  | 1.47567100  |
|                    | C           | -7.45411600 | -1.45807200 | -0.32490600 |
|                    | C           | -7.61960300 | -2.17221700 | 1.00390900  |
|                    | H           | -7.50603900 | -2.17297600 | -1.14584500 |
|                    | H           | -8.24508900 | -0.71822800 | -0.46317800 |
|                    | H           | -8.59766000 | -2.65677100 | 1.05189400  |
|                    | H           | -6.85209100 | -2.93891000 | 1.11989400  |
|                    | H           | -7.54746600 | -1.47246100 | 1.83997200  |
| <b>Ligand 2-C2</b> |             |             |             |             |
| C                  | -0.11452000 | -0.11492600 | -0.40632200 |             |
| N                  | 1.15462600  | 0.26146000  | -0.30134700 |             |
| C                  | 2.10709700  | -0.66131100 | -0.34350300 |             |
| C                  | 1.82932600  | -2.01837600 | -0.49256700 |             |
| C                  | 0.50583500  | -2.40806500 | -0.60653100 |             |
| C                  | -0.48871700 | -1.44927300 | -0.56464000 |             |
| C                  | -1.13201500 | 0.96309000  | -0.35405600 |             |
| N                  | -2.41226500 | 0.59051400  | -0.34596500 |             |
| C                  | -3.34919700 | 1.53015900  | -0.32986600 |             |
| C                  | -3.05482100 | 2.88934500  | -0.32200400 |             |
| C                  | -1.72514000 | 3.27211700  | -0.29628900 |             |
| C                  | -0.74212700 | 2.29942800  | -0.31560100 |             |
| H                  | 2.64083900  | -2.73226200 | -0.51880700 |             |
| H                  | 0.25318800  | -3.45513000 | -0.73102700 |             |
| H                  | -1.53710800 | -1.69981500 | -0.65452500 |             |
| H                  | -3.86141300 | 3.61001800  | -0.35271100 |             |
| H                  | -1.45620100 | 4.32219400  | -0.27443100 |             |
| H                  | 0.31334500  | 2.53835900  | -0.30774200 |             |
| N                  | 4.97363500  | 1.52656200  | -0.09096200 |             |
| N                  | 3.73993300  | 1.11442400  | -0.23517800 |             |
| C                  | 5.97155400  | 0.66093300  | 0.04966400  |             |
| C                  | 7.35354300  | 1.25478800  | 0.22784300  |             |
| C                  | 8.32686100  | 0.16060500  | 0.67805600  |             |
| C                  | 8.16675200  | -1.13060200 | -0.10174000 |             |
| C                  | 6.78996300  | -1.77566400 | 0.08713800  |             |
| C                  | 5.71017400  | -0.71753400 | -0.00662800 |             |
| N                  | 4.46094900  | -1.12812200 | -0.12910700 |             |
| C                  | 3.51488500  | -0.19794200 | -0.22395800 |             |
| C                  | 6.68052400  | -2.44046200 | 1.46515200  |             |
| H                  | 7.41483700  | -3.24618200 | 1.54680700  |             |
| H                  | 6.85834700  | -1.73363800 | 2.27847900  |             |
| H                  | 5.68421500  | -2.86526800 | 1.60153600  |             |
| C                  | 6.57227700  | -2.83698300 | -0.99069700 |             |
| <b>Ligand 2-C3</b> |             |             |             |             |
| C                  | 0.26525700  | -1.64250600 | -0.03895800 |             |
| N                  | -0.95880900 | -1.12678000 | 0.00552300  |             |
| C                  | -1.94545400 | -1.76122600 | -0.61565900 |             |
| C                  | -1.75170600 | -2.95131200 | -1.31469900 |             |
| C                  | -0.47613100 | -3.48672100 | -1.35452100 |             |
| C                  | 0.55522800  | -2.83000100 | -0.70969700 |             |
| C                  | 1.33241000  | -0.89670100 | 0.67230500  |             |
| N                  | 2.57323800  | -1.36585800 | 0.55958500  |             |
| C                  | 3.55472800  | -0.71938800 | 1.17227700  |             |
| C                  | 3.34961900  | 0.42140500  | 1.93866700  |             |
| C                  | 2.05491000  | 0.89552500  | 2.07051000  |             |
| C                  | 1.02613600  | 0.23484500  | 1.42628000  |             |
| H                  | -2.59136400 | -3.42629400 | -1.80292300 |             |
| H                  | -0.28929200 | -4.41419500 | -1.88404200 |             |
| H                  | 1.56948700  | -3.20614900 | -0.70354500 |             |
| H                  | 4.18430100  | 0.91766700  | 2.41796100  |             |
| H                  | 1.85192100  | 1.77571400  | 2.67034100  |             |
| H                  | -0.00319500 | 0.56239200  | 1.48670800  |             |
| N                  | -5.48210700 | -1.29869900 | -1.14286300 |             |
| N                  | -4.26671900 | -1.77666400 | -1.21023300 |             |
| C                  | -5.73887300 | -0.20731600 | -0.43121400 |             |
| C                  | -7.18077100 | 0.25625100  | -0.40859600 |             |
| C                  | -7.36317200 | 1.30385500  | 0.69444400  |             |
| C                  | -6.25452200 | 2.33920000  | 0.71663200  |             |
| C                  | -4.87932900 | 1.73522900  | 1.01697700  |             |
| C                  | -4.68855800 | 0.46065500  | 0.22102600  |             |
| N                  | -3.46837200 | -0.04117200 | 0.16837000  |             |
| C                  | -3.29949500 | -1.15161500 | -0.53956100 |             |
| C                  | -4.74682100 | 1.38148400  | 2.50377000  |             |
| H                  | -4.82339900 | 2.28918300  | 3.10824700  |             |
| H                  | -5.52292300 | 0.68673800  | 2.83249300  |             |
| H                  | -3.77734700 | 0.91748900  | 2.69432100  |             |
| C                  | -3.78586000 | 2.73825500  | 0.65068700  |             |

|                    |              |             |             |                    |             |             |             |
|--------------------|--------------|-------------|-------------|--------------------|-------------|-------------|-------------|
| H                  | 6.59648400   | -2.39597200 | -1.99045700 | H                  | -3.82602900 | 2.99518000  | -0.41105800 |
| H                  | 7.36584500   | -3.58648300 | -0.93185700 | H                  | -3.92320100 | 3.65703600  | 1.22707400  |
| H                  | 5.61210500   | -3.33698000 | -0.86279300 | H                  | -2.79704100 | 2.33208700  | 0.86375800  |
| C                  | 7.79296900   | 1.86168900  | -1.11012200 | C                  | -7.51927500 | 0.84436800  | -1.78379400 |
| H                  | 7.07205200   | 2.61435300  | -1.43438500 | H                  | -7.35469000 | 0.09645000  | -2.56168700 |
| H                  | 8.76957900   | 2.34073400  | -0.99968900 | H                  | -8.56908700 | 1.14878700  | -1.81159200 |
| H                  | 7.86962900   | 1.10916200  | -1.89830900 | H                  | -6.90518900 | 1.71601900  | -2.02130200 |
| C                  | 7.31371800   | 2.36286300  | 1.28057300  | C                  | -8.10820100 | -0.92909100 | -0.13959900 |
| H                  | 6.97105400   | 1.97818000  | 2.24470200  | H                  | -7.87644500 | -1.40082800 | 0.81884700  |
| H                  | 8.31697400   | 2.77551100  | 1.41739900  | H                  | -9.14500600 | -0.58349200 | -0.10543700 |
| H                  | 6.64198200   | 3.16586700  | 0.97776100  | H                  | -8.01556100 | -1.68410600 | -0.92006700 |
| H                  | 8.17571700   | -0.03223400 | 1.74569000  | H                  | -7.41115000 | 0.79441100  | 1.66302800  |
| H                  | 9.34881400   | 0.53927100  | 0.58054000  | H                  | -8.33449900 | 1.78924600  | 0.55887600  |
| H                  | 8.93426300   | -1.85248500 | 0.19366400  | H                  | -6.46846300 | 3.11068800  | 1.46265500  |
| H                  | 8.32535900   | -0.93879500 | -1.16840200 | H                  | -6.21292700 | 2.85478000  | -0.24886400 |
| C                  | -4.80213100  | 1.13653900  | -0.45248900 | C                  | 4.91594400  | -1.36462000 | 1.09163800  |
| O                  | -5.48353200  | 1.74800600  | -1.25563700 | O                  | 5.07255300  | -2.50155100 | 1.48774300  |
| N                  | -5.29059600  | 0.11860500  | 0.31163100  | N                  | 5.95195900  | -0.59504400 | 0.63861600  |
| C                  | -6.65129300  | -0.27474000 | 0.13334900  | C                  | 5.76632200  | 0.59686800  | -0.10781200 |
| C                  | -7.69652500  | 0.62428100  | 0.30370400  | C                  | 4.93214300  | 0.62506300  | -1.21939100 |
| C                  | -6.93967600  | -1.59353500 | -0.18547100 | C                  | 6.45006800  | 1.75573500  | 0.24713200  |
| C                  | -9.00592400  | 0.20139500  | 0.15670100  | C                  | 4.76609100  | 1.79747000  | -1.93959700 |
| H                  | -7.47821400  | 1.65818000  | 0.53770700  | H                  | 4.41122900  | -0.27718200 | -1.51818700 |
| C                  | -8.25502800  | -2.00977300 | -0.32315400 | C                  | 6.29082500  | 2.91629900  | -0.48950500 |
| H                  | -6.12788600  | -2.29678700 | -0.33567000 | H                  | 7.10360200  | 1.74853200  | 1.11250000  |
| H                  | -9.81137200  | 0.91647900  | 0.29157200  | H                  | 4.10682500  | 1.79896100  | -2.80157500 |
| H                  | -8.46188000  | -3.04543100 | -0.57292000 | H                  | 6.83398800  | 3.80913400  | -0.19640800 |
| C                  | -10.73290700 | -1.55984300 | -0.33896900 | C                  | 5.24242400  | 4.23356100  | -2.36174200 |
| H                  | -10.82289900 | -2.64636800 | -0.29375200 | H                  | 6.15912100  | 4.82552700  | -2.39682700 |
| H                  | -11.12224300 | -1.23612000 | -1.30917500 | H                  | 4.47012800  | 4.85591200  | -1.89869500 |
| H                  | -11.38228700 | -1.13257900 | 0.42853000  | H                  | 4.92749900  | 4.03192300  | -3.38698600 |
| C                  | -9.31124400  | -1.12091000 | -0.15829100 | C                  | 5.43981900  | 2.96332800  | -1.59163500 |
| C                  | -4.60370600  | -0.44713000 | 1.47066200  | C                  | 7.29016700  | -1.17911900 | 0.68330000  |
| C                  | -5.01455000  | 0.21276100  | 2.77501300  | C                  | 7.62668500  | -1.97324300 | -0.56533900 |
| H                  | -3.53243900  | -0.36466900 | 1.31000500  | H                  | 7.32799000  | -1.82357500 | 1.56136600  |
| H                  | -4.83738300  | -1.51393000 | 1.50260300  | H                  | 8.00402500  | -0.36499400 | 0.82365500  |
| H                  | -4.51252200  | -0.27164000 | 3.61606600  | H                  | 8.64090600  | -2.37335900 | -0.49531200 |
| H                  | -4.73976900  | 1.27039500  | 2.78035300  | H                  | 6.93615200  | -2.81019400 | -0.67940000 |
| H                  | -6.09244600  | 0.13836000  | 2.93509100  | H                  | 7.57123600  | -1.34676100 | -1.45880200 |
| <b>Ligand 3-C1</b> |              |             |             | <b>Ligand 3-C2</b> |             |             |             |
| N                  | 1.65302500   | 0.44866300  | 0.08175000  | N                  | 1.95950900  | -0.35939400 | -0.82521700 |
| N                  | 2.59176900   | 1.34715800  | -0.07290100 | N                  | 2.54559900  | -1.52834300 | -0.86480400 |
| N                  | 3.25767700   | -1.27290400 | -0.06300900 | N                  | 3.85335300  | 0.57229400  | 0.22801600  |

|   |             |             |             |   |             |             |             |
|---|-------------|-------------|-------------|---|-------------|-------------|-------------|
| C | 2.00652900  | -0.83544200 | 0.04584900  | C | 2.61299600  | 0.64481400  | -0.24490500 |
| C | 3.85889400  | 0.98938700  | -0.25318800 | C | 3.75837900  | -1.70249100 | -0.34988500 |
| C | -4.28418600 | 1.03074000  | -1.59480000 | C | -4.23682600 | 0.67087900  | 0.17532400  |
| C | 4.21071900  | -0.36858600 | -0.20401800 | C | 4.45571200  | -0.60316900 | 0.17531200  |
| C | 5.79582600  | -1.51587600 | -1.70217700 | C | 5.80587800  | -0.58494300 | 2.23699800  |
| H | 6.80250900  | -1.93027700 | -1.80178700 | H | 6.81733000  | -0.59494400 | 2.65167700  |
| H | 5.63896300  | -0.80263400 | -2.51413500 | H | 5.24644500  | -1.40991200 | 2.68313700  |
| H | 5.07419700  | -2.32590100 | -1.82331700 | H | 5.32014100  | 0.34743100  | 2.53077200  |
| C | 5.91106200  | -1.91705100 | 0.75223000  | C | 6.70116500  | 0.47406300  | 0.16952000  |
| H | 6.94740000  | -2.25629300 | 0.67581800  | H | 7.72645900  | 0.39461900  | 0.54017600  |
| H | 5.25448600  | -2.77936700 | 0.63517100  | H | 6.28973900  | 1.43128900  | 0.49031800  |
| H | 5.76222700  | -1.50709100 | 1.75451000  | H | 6.73461500  | 0.46424400  | -0.92299600 |
| C | 5.63640100  | -0.86542500 | -0.32206200 | C | 5.87063900  | -0.69031400 | 0.70799300  |
| C | 6.18977200  | 1.53941500  | -0.92888400 | C | 5.57631500  | -3.20130900 | 0.45149500  |
| C | 6.60946000  | 0.30562800  | -0.15253100 | C | 6.50642600  | -2.01570600 | 0.27654900  |
| H | 6.95425000  | 2.31801700  | -0.84779900 | H | 6.09861100  | -4.13275900 | 0.21313100  |
| H | 6.11601900  | 1.29690900  | -1.99444800 | H | 5.27625700  | -3.28237200 | 1.50178200  |
| H | 6.68917400  | 0.54976800  | 0.91231800  | H | 6.81145300  | -1.93833000 | -0.77267000 |
| H | 7.60641200  | -0.02047300 | -0.46419500 | H | 7.42661800  | -2.16469100 | 0.84966100  |
| O | -5.00805000 | 1.18381000  | -2.56621400 | O | -5.27305000 | 0.72839300  | 0.81935900  |
| N | -3.60121900 | 2.04482300  | -1.00971200 | N | -3.78883000 | -0.48268300 | -0.38481900 |
| C | -3.05730400 | 1.97168200  | 0.30602700  | C | -4.51966200 | -1.67493800 | -0.10065100 |
| C | -3.90298300 | 1.92490800  | 1.40458600  | C | -4.61594000 | -2.15380700 | 1.20032200  |
| C | -1.68211700 | 1.98373300  | 0.50354100  | C | -5.12201500 | -2.38542700 | -1.12693100 |
| C | -3.37755600 | 1.88739200  | 2.68920900  | C | -5.30170300 | -3.32535800 | 1.46106000  |
| H | -4.97661400 | 1.91552700  | 1.25116800  | H | -4.15679900 | -1.59465100 | 2.00610400  |
| C | -1.16858400 | 1.95476600  | 1.78558000  | C | -5.80244600 | -3.56416200 | -0.85701800 |
| H | -1.01313700 | 1.95863500  | -0.34750300 | H | -5.07024700 | -2.01162700 | -2.14331900 |
| H | -4.05069300 | 1.84454900  | 3.53956300  | H | -5.36857300 | -3.68386300 | 2.48357300  |
| H | -0.09161700 | 1.93309300  | 1.91303600  | H | -6.27015500 | -4.10620600 | -1.67263900 |
| C | -1.43042400 | 1.88194500  | 4.28570700  | C | -6.64126500 | -5.32726600 | 0.73500900  |
| H | -0.93244700 | 2.82626000  | 4.52501700  | H | -7.07672700 | -5.75401300 | -0.16976100 |
| H | -0.68376300 | 1.09017900  | 4.38791200  | H | -7.45089000 | -5.15828800 | 1.45022500  |
| H | -2.20555600 | 1.71484600  | 5.03535800  | H | -5.97608700 | -6.07718600 | 1.17255400  |
| C | -2.00479400 | 1.90931600  | 2.90119800  | C | -5.90544200 | -4.05550200 | 0.43827200  |
| C | -3.63811900 | 3.35418400  | -1.65148500 | C | -2.62495300 | -0.63217800 | -1.25988400 |
| C | -4.78578600 | 4.22764800  | -1.17789200 | C | -1.44804900 | -1.28169500 | -0.56338700 |
| H | -3.71704900 | 3.18189500  | -2.72526300 | H | -2.34364200 | 0.34651900  | -1.63766500 |
| H | -2.67937300 | 3.83791500  | -1.44882200 | H | -2.94116000 | -1.23615800 | -2.11526000 |
| H | -4.74919800 | 5.19872600  | -1.67765500 | H | -0.62177900 | -1.41759500 | -1.26296700 |
| H | -5.74277100 | 3.75876800  | -1.41326800 | H | -1.08873000 | -0.63753700 | 0.23930800  |
| H | -4.73270800 | 4.40097700  | -0.10064600 | H | -1.72452300 | -2.25739900 | -0.15583700 |
| C | 4.85114600  | 2.11573600  | -0.45592600 | C | 4.31929700  | -3.10770200 | -0.41942400 |
| C | 4.32080400  | 3.09419600  | -1.50443400 | C | 3.27754800  | -4.10805600 | 0.08287500  |

|                    |             |             |             |   |             |             |             |
|--------------------|-------------|-------------|-------------|---|-------------|-------------|-------------|
| C                  | 5.01607400  | 2.85996600  | 0.87455500  | C | 4.64348200  | -3.42661600 | -1.88381200 |
| H                  | 3.37708900  | 3.53615100  | -1.18501700 | H | 2.37761100  | -4.07706200 | -0.53119400 |
| H                  | 4.15537000  | 2.59418500  | -2.46225500 | H | 2.99161600  | -3.89419200 | 1.11598400  |
| H                  | 5.04883400  | 3.89473000  | -1.66118900 | H | 3.69253900  | -5.11904300 | 0.04825400  |
| H                  | 4.04948200  | 3.23378100  | 1.21699200  | H | 3.74732900  | -3.31963300 | -2.49754800 |
| H                  | 5.69094000  | 3.71032100  | 0.74487600  | H | 5.00323500  | -4.45543300 | -1.97028400 |
| H                  | 5.42454600  | 2.21715100  | 1.65780200  | H | 5.40992000  | -2.76232600 | -2.28975800 |
| N                  | -2.85724700 | -0.72151700 | -0.73596200 | N | -2.14620300 | 1.95537900  | -0.01081900 |
| N                  | -0.29562500 | -1.48783900 | -0.12139400 | N | 0.60560900  | 1.95392900  | -0.13279400 |
| C                  | -3.39099200 | -4.27399400 | 0.14389100  | C | -1.43986800 | 5.58970400  | -0.00487800 |
| C                  | -2.12972700 | -4.65170100 | 0.45625800  | C | -0.08723700 | 5.58926000  | -0.01009700 |
| C                  | 0.27277400  | -4.09127600 | 0.67060900  | C | 2.04270600  | 4.33312000  | -0.04646300 |
| C                  | 0.93419100  | -1.85749000 | 0.16396300  | C | 1.92145100  | 1.95591200  | -0.15173900 |
| C                  | -5.17553000 | -1.23811700 | -1.04268700 | C | -4.22701000 | 3.13850400  | 0.03401800  |
| C                  | -4.96707600 | -2.52595700 | -0.63099800 | C | -3.57449600 | 4.33841000  | 0.00847700  |
| C                  | -4.07770600 | -0.36186500 | -1.05881300 | C | -3.45975700 | 1.95839600  | 0.02176700  |
| C                  | -1.04888700 | -3.72671200 | 0.37176600  | C | 0.63990200  | 4.36470400  | -0.03952700 |
| C                  | -3.67244800 | -2.94115400 | -0.27634600 | C | -2.17011900 | 4.36604300  | -0.01079200 |
| C                  | 1.27290800  | -3.16441000 | 0.56259400  | C | 2.69293700  | 3.13115500  | -0.09097300 |
| C                  | -1.27919300 | -2.38966500 | -0.03089600 | C | -0.04108100 | 3.12376600  | -0.06526300 |
| C                  | -2.63372000 | -1.98660500 | -0.36179400 | C | -1.49242400 | 3.12650900  | -0.02674400 |
| H                  | -6.14600400 | -0.88115200 | -1.36219700 | H | -5.30447900 | 3.06242300  | 0.08625800  |
| H                  | 2.30501700  | -3.40864700 | 0.77327400  | H | 3.77223100  | 3.06247200  | -0.08979600 |
| H                  | -5.78544900 | -3.23721300 | -0.58501500 | H | -4.12525000 | 5.27346700  | 0.01534200  |
| H                  | 0.48795500  | -5.10816500 | 0.98261500  | H | 2.59676400  | 5.26579500  | -0.01932700 |
| H                  | -4.21089400 | -4.98223900 | 0.20345300  | H | -1.99375500 | 6.52249900  | 0.01155200  |
| H                  | -1.91842600 | -5.66798000 | 0.77215300  | H | 0.46778800  | 6.52141400  | 0.00369100  |
| <b>Ligand 3-C3</b> |             |             |             |   |             |             |             |
| N                  | -3.29252800 | 2.28740700  | 0.34493700  |   |             |             |             |
| N                  | -4.43341300 | 1.64888200  | 0.30768700  |   |             |             |             |
| N                  | -2.13672100 | 0.34421100  | -0.31815700 |   |             |             |             |
| C                  | -2.17887300 | 1.62397200  | 0.03667500  |   |             |             |             |
| C                  | -4.47744300 | 0.37082000  | -0.04729300 |   |             |             |             |
| C                  | 3.60052000  | -1.53286600 | -1.55302200 |   |             |             |             |
| C                  | -3.28782100 | -0.29948800 | -0.38616000 |   |             |             |             |
| C                  | -2.71782700 | -2.57776400 | 0.36360200  |   |             |             |             |
| H                  | -2.64370100 | -3.62930000 | 0.07394500  |   |             |             |             |
| H                  | -3.36376900 | -2.51153400 | 1.24182200  |   |             |             |             |
| H                  | -1.72442500 | -2.23082900 | 0.65126300  |   |             |             |             |
| C                  | -2.31086400 | -1.91887200 | -2.00534600 |   |             |             |             |
| H                  | -2.27911000 | -2.97015500 | -2.30335900 |   |             |             |             |
| H                  | -1.30120500 | -1.58974500 | -1.76025400 |   |             |             |             |
| H                  | -2.65481000 | -1.33458100 | -2.86269300 |   |             |             |             |

|   |             |             |             |
|---|-------------|-------------|-------------|
| C | -3.25272600 | -1.75248300 | -0.81364900 |
| C | -5.71993000 | -1.78466100 | -0.20452300 |
| C | -4.66114100 | -2.21204100 | -1.20301600 |
| H | -6.69363600 | -2.20043400 | -0.48098100 |
| H | -5.48417500 | -2.19707900 | 0.78225600  |
| H | -4.90345900 | -1.81133200 | -2.19322500 |
| H | -4.65594000 | -3.30106700 | -1.30991000 |
| O | 4.13885100  | -1.92361100 | -2.57547300 |
| N | 2.87963200  | -2.34189900 | -0.73589600 |
| C | 2.55228400  | -2.00367800 | 0.61003600  |
| C | 3.52602600  | -2.05215900 | 1.59640800  |
| C | 1.25238800  | -1.65327900 | 0.95443800  |
| C | 3.20241400  | -1.75755500 | 2.91445500  |
| H | 4.54293000  | -2.31702300 | 1.32882100  |
| C | 0.93789100  | -1.36903800 | 2.26951300  |
| H | 0.50829700  | -1.54654900 | 0.17516300  |
| H | 3.97645400  | -1.79375900 | 3.67420600  |
| H | -0.07677300 | -1.07510400 | 2.51951900  |
| C | 1.54509400  | -1.11202300 | 4.69694100  |
| H | 0.88113800  | -1.87731300 | 5.10967600  |
| H | 1.02170100  | -0.15570000 | 4.77512200  |
| H | 2.43228300  | -1.06455600 | 5.33005900  |
| C | 1.90442500  | -1.41916500 | 3.27462400  |
| C | 2.63156700  | -3.71196700 | -1.17038500 |
| C | 3.69801500  | -4.69671900 | -0.72631400 |
| H | 2.57183900  | -3.69332200 | -2.25910300 |
| H | 1.65401000  | -4.00224300 | -0.77638800 |
| H | 3.44896500  | -5.70133900 | -1.07671600 |
| H | 4.66765000  | -4.42102100 | -1.14443800 |
| H | 3.77914400  | -4.73154800 | 0.36243000  |
| C | -5.85318800 | -0.26273900 | -0.08955100 |
| C | -6.63117400 | 0.08435700  | 1.17990200  |
| C | -6.60267300 | 0.30991400  | -1.29925600 |
| H | -6.76418200 | 1.16173800  | 1.27616200  |
| H | -6.11070500 | -0.27529900 | 2.07137500  |
| H | -7.61556300 | -0.39046500 | 1.14772400  |
| H | -6.66257200 | 1.39720900  | -1.22346200 |
| H | -7.61873400 | -0.09247900 | -1.33251300 |
| H | -6.10833900 | 0.06560200  | -2.24230400 |
| N | 2.56028800  | 0.52524800  | -0.84726600 |
| N | 0.20247600  | 1.80620600  | -0.23682500 |
| C | 3.76092500  | 3.98941600  | -0.36246200 |
| C | 2.61288000  | 4.60872200  | -0.00363300 |
| C | 0.17458100  | 4.51053200  | 0.40628400  |

|                                               |             |             |             |                                               |             |             |             |
|-----------------------------------------------|-------------|-------------|-------------|-----------------------------------------------|-------------|-------------|-------------|
| C                                             | -0.91987500 | 2.41761000  | 0.07724700  |                                               |             |             |             |
| C                                             | 4.90203600  | 0.59439500  | -1.34886400 |                                               |             |             |             |
| C                                             | 4.94581300  | 1.93188100  | -1.06430200 |                                               |             |             |             |
| C                                             | 3.67637900  | -0.07262800 | -1.19552400 |                                               |             |             |             |
| C                                             | 1.38369300  | 3.89061600  | 0.05583600  |                                               |             |             |             |
| C                                             | 3.77245600  | 2.59874000  | -0.67424400 |                                               |             |             |             |
| C                                             | -0.98229900 | 3.78281100  | 0.42116000  |                                               |             |             |             |
| C                                             | 1.34112900  | 2.50995400  | -0.25065000 |                                               |             |             |             |
| C                                             | 2.58033700  | 1.84152900  | -0.60462200 |                                               |             |             |             |
| H                                             | 5.77148500  | 0.04468100  | -1.68570700 |                                               |             |             |             |
| H                                             | -1.93624800 | 4.22217300  | 0.67676700  |                                               |             |             |             |
| H                                             | 5.87342200  | 2.48964400  | -1.14242200 |                                               |             |             |             |
| H                                             | 0.16931600  | 5.56669200  | 0.65559400  |                                               |             |             |             |
| H                                             | 4.69363700  | 4.54093100  | -0.41853800 |                                               |             |             |             |
| H                                             | 2.60603600  | 5.66673600  | 0.23669900  |                                               |             |             |             |
| <b>Am(L1)(NO<sub>3</sub>)<sub>3</sub>-isI</b> |             |             |             | <b>Eu(L1)(NO<sub>3</sub>)<sub>3</sub>-isI</b> |             |             |             |
| Am                                            | -0.03727100 | -1.49952100 | 0.10980200  | Eu                                            | -0.18048300 | -1.73081400 | 0.19908200  |
| N                                             | 0.67798800  | 0.97993400  | 0.61567800  | N                                             | 0.79930800  | 0.68858900  | 0.50431500  |
| O                                             | -0.15950600 | -2.94226900 | 2.07979200  | O                                             | 0.49122000  | -1.83910300 | 2.54710500  |
| O                                             | -0.82444200 | -0.93116100 | 2.41719100  | O                                             | -1.43066000 | -0.97178300 | 2.18145100  |
| O                                             | -1.58968900 | -3.26385700 | -0.49446700 | O                                             | -0.90498400 | -3.94334300 | 0.76101400  |
| O                                             | -1.27697100 | -1.78328900 | -2.00985700 | O                                             | -2.24485700 | -2.78512600 | -0.44758300 |
| O                                             | 1.50110100  | -0.60411200 | -1.63513500 | O                                             | 0.43380600  | -0.97839700 | -2.04726400 |
| O                                             | 1.60005800  | -2.72310700 | -1.31626500 | O                                             | 0.77399900  | -3.04963400 | -1.61569400 |
| O                                             | 2.82773900  | -1.80907800 | -2.83986200 | O                                             | 1.49137700  | -2.21104000 | -3.47232300 |
| O                                             | -2.74515300 | -3.33669700 | -2.32037800 | O                                             | -2.76428300 | -4.81293000 | 0.08776400  |
| O                                             | -0.72258000 | -2.31981500 | 4.06940000  | O                                             | -0.71628000 | -1.17590200 | 4.21087600  |
| N                                             | -1.90507200 | -2.81728600 | -1.64305500 | N                                             | -2.00466100 | -3.89097900 | 0.13077700  |
| N                                             | 2.00445800  | -1.72445900 | -1.96991500 | N                                             | 0.91943600  | -2.08969600 | -2.42355500 |
| N                                             | -0.57441800 | -2.07661000 | 2.90620300  | N                                             | -0.55883600 | -1.32834100 | 3.03278000  |
| C                                             | 0.16368400  | 3.27400800  | 0.99162200  | C                                             | 0.40154400  | 2.89765700  | 1.29013900  |
| C                                             | 1.47889100  | 3.51218300  | 1.34321900  | C                                             | 1.73031400  | 3.00279300  | 1.65551600  |
| C                                             | -0.19704700 | 1.98139400  | 0.63366300  | C                                             | -0.02602000 | 1.70978600  | 0.70922000  |
| C                                             | 1.94808300  | 1.21092200  | 0.93269600  | C                                             | 2.09303100  | 0.81422000  | 0.78475200  |
| H                                             | -0.58788000 | 4.05134000  | 1.00220200  | H                                             | -0.30853300 | 3.69681200  | 1.45276400  |
| H                                             | 1.79472800  | 4.50325400  | 1.64656200  | H                                             | 2.09530100  | 3.90020200  | 2.14076900  |
| C                                             | 2.39140800  | 2.47099300  | 1.31257600  | C                                             | 2.60125500  | 1.95923300  | 1.38400700  |
| H                                             | 3.42474700  | 2.63228700  | 1.58464200  | H                                             | 3.64849900  | 2.03623200  | 1.63783600  |
| N                                             | -1.83365100 | 0.37407900  | -0.02320100 | N                                             | -1.72754300 | 0.33439900  | -0.25557600 |
| N                                             | -3.05209500 | 0.00976200  | -0.32642900 | N                                             | -2.92344800 | 0.14773000  | -0.74222800 |
| N                                             | -2.51573300 | 2.59061200  | 0.31808200  | N                                             | -2.27149600 | 2.52872700  | 0.37926500  |
| C                                             | -1.59199300 | 1.64138000  | 0.28541500  | C                                             | -1.42218700 | 1.52111800  | 0.26079900  |
| C                                             | -4.03090100 | 0.90025900  | -0.32978000 | C                                             | -3.82658400 | 1.11538600  | -0.68488500 |

|   |             |             |             |   |             |             |             |
|---|-------------|-------------|-------------|---|-------------|-------------|-------------|
| C | -3.75573000 | 2.24077000  | 0.02417000  | C | -3.50405200 | 2.33761900  | -0.06147500 |
| C | -4.62079900 | 4.20889800  | -1.16727600 | C | -4.11636000 | 4.57672000  | -0.87771800 |
| H | -5.35021200 | 5.02234200  | -1.14763000 | H | -4.78873300 | 5.42792100  | -0.74516000 |
| H | -4.74926400 | 3.65845700  | -2.10128700 | H | -4.18496600 | 4.24689000  | -1.91634300 |
| H | -3.61946500 | 4.64385000  | -1.16752300 | H | -3.09374600 | 4.91373600  | -0.69761900 |
| C | -4.64830400 | 4.16690800  | 1.32537400  | C | -4.41077000 | 4.01632400  | 1.53399300  |
| H | -4.72399300 | 3.55730800  | 2.22906700  | H | -4.61936400 | 3.23919000  | 2.27313300  |
| H | -5.43824400 | 4.92109200  | 1.35911200  | H | -5.15072100 | 4.81062000  | 1.65929500  |
| H | -3.68428800 | 4.67540400  | 1.33619400  | H | -3.42298700 | 4.42811200  | 1.74170400  |
| C | -5.91063100 | -0.47323600 | 0.47562800  | C | -5.86402200 | -0.22486200 | -0.35065000 |
| H | -6.88510300 | -0.89783100 | 0.22248000  | H | -6.83084700 | -0.51052500 | -0.77262800 |
| H | -6.01828500 | 0.10488200  | 1.39637300  | H | -6.03319500 | 0.17517300  | 0.65165200  |
| H | -5.21917300 | -1.29440600 | 0.67202800  | H | -5.24837400 | -1.12115000 | -0.25571000 |
| C | -5.32028100 | -0.49107300 | -1.94785500 | C | -5.00629700 | 0.16042100  | -2.65731300 |
| H | -6.32541300 | -0.82174500 | -2.22151200 | H | -5.98973500 | -0.05116500 | -3.08459100 |
| H | -4.69913400 | -1.37188300 | -1.78926400 | H | -4.44592200 | -0.77227400 | -2.59487500 |
| H | -4.90620500 | 0.06625000  | -2.79179200 | H | -4.47920100 | 0.83408300  | -3.33813100 |
| C | -4.81640800 | 3.31608700  | 0.06659500  | C | -4.49548500 | 3.46503200  | 0.11042400  |
| C | -5.40410500 | 0.38159200  | -0.69405900 | C | -5.18003200 | 0.79192000  | -1.27513200 |
| C | -6.34449500 | 1.56217900  | -0.95811500 | C | -6.00595000 | 2.07640100  | -1.39330300 |
| C | -6.20707900 | 2.67316900  | 0.06473500  | C | -5.91483500 | 2.95312300  | -0.15842500 |
| H | -7.37184600 | 1.18796500  | -0.97497700 | H | -7.04695400 | 1.80339300  | -1.58754200 |
| H | -6.14986300 | 1.95513300  | -1.96154300 | H | -5.67094100 | 2.63747300  | -2.27242800 |
| H | -6.41833400 | 2.28310300  | 1.06605400  | H | -6.26158300 | 2.39398300  | 0.71682100  |
| H | -6.94939100 | 3.45534400  | -0.11904100 | H | -6.58169800 | 3.81525500  | -0.25173000 |
| C | 2.77534700  | -0.04691800 | 0.99945500  | C | 2.86961800  | -0.43642400 | 0.45906100  |
| O | 2.18069600  | -1.09864700 | 1.25082100  | O | 2.24485900  | -1.49587000 | 0.38993600  |
| C | 4.79301700  | 1.04287000  | 0.18829400  | C | 4.93040400  | 0.76349200  | -0.06613800 |
| C | 5.85925700  | 1.69629400  | 0.79578800  | C | 6.02474800  | 1.15517600  | 0.69606500  |
| C | 4.42003100  | 1.38568300  | -1.10496900 | C | 4.58154900  | 1.49675400  | -1.19237300 |
| C | 6.53117800  | 2.69767400  | 0.11707900  | C | 6.74467500  | 2.28285000  | 0.34182900  |
| H | 6.15147300  | 1.43137000  | 1.80602600  | H | 6.29889400  | 0.58486200  | 1.57673800  |
| C | 5.09643600  | 2.39795700  | -1.76772700 | C | 5.30432000  | 2.62984500  | -1.53044100 |
| H | 3.60757800  | 0.85471900  | -1.59124500 | H | 3.74536700  | 1.17574100  | -1.80396200 |
| H | 7.35765800  | 3.20594900  | 0.60286900  | H | 7.59191800  | 2.58370500  | 0.94923000  |
| C | 6.16196900  | 3.06863900  | -1.17523300 | C | 6.39758800  | 3.04241200  | -0.77471000 |
| H | 4.79508100  | 2.65820800  | -2.77688900 | H | 5.01802000  | 3.19664600  | -2.41002100 |
| C | 6.91582600  | 4.13038800  | -1.91549000 | C | 7.20110200  | 4.24389600  | -1.16724200 |
| H | 6.28551600  | 4.62227200  | -2.65788800 | H | 6.60498400  | 4.95041100  | -1.74660600 |
| H | 7.77050800  | 3.69959900  | -2.44621400 | H | 8.05623700  | 3.95264700  | -1.78491700 |
| H | 7.30473400  | 4.89115400  | -1.23618300 | H | 7.59503500  | 4.76348800  | -0.29188500 |
| C | 4.87395800  | -1.21774400 | 1.18978800  | C | 4.89236000  | -1.69591800 | 0.11396900  |
| C | 5.07952100  | -2.12619400 | -0.00575700 | C | 4.94579900  | -2.15561900 | -1.32965500 |
| H | 5.83386400  | -0.88453300 | 1.58891700  | H | 5.89885800  | -1.56186900 | 0.51466500  |



|                                               |             |             |             |                                               |             |             |             |
|-----------------------------------------------|-------------|-------------|-------------|-----------------------------------------------|-------------|-------------|-------------|
| H                                             | 4.33611600  | -1.73826800 | 1.98130500  | H                                             | 4.37076900  | -2.42500600 | 0.73233000  |
| H                                             | 5.72539100  | -2.95866900 | 0.28128300  | H                                             | 5.50304200  | -3.09247400 | -1.39163500 |
| H                                             | 4.13429500  | -2.54104200 | -0.35588500 | H                                             | 3.94554500  | -2.33463400 | -1.72551500 |
| H                                             | 5.55846400  | -1.59728400 | -0.83212800 | H                                             | 5.45056200  | -1.42210000 | -1.96217700 |
| N                                             | 4.11018900  | -0.00108200 | 0.87632200  | N                                             | 4.20110300  | -0.40831600 | 0.28282600  |
| <b>Am(L1)(NO<sub>3</sub>)<sub>3</sub>-is2</b> |             |             |             | <b>Eu(L1)(NO<sub>3</sub>)<sub>3</sub>-is2</b> |             |             |             |
| Am                                            | -0.30546700 | -0.99154200 | -0.37988900 | Eu                                            | 0.33244100  | -1.03523800 | 0.45401900  |
| N                                             | -0.16052400 | 1.65548200  | -0.11925800 | N                                             | 0.19660100  | 1.56798800  | 0.09993400  |
| O                                             | -0.89455400 | -0.58217600 | -2.75061900 | O                                             | 0.89808900  | -0.27988300 | 2.70853500  |
| O                                             | 1.16099800  | -0.24473400 | -2.25345600 | O                                             | -1.19499900 | -0.37874100 | 2.27547300  |
| O                                             | -0.52825400 | -3.25847900 | -1.23811800 | O                                             | 0.52698600  | -3.13593900 | 1.58680800  |
| O                                             | 1.22762000  | -2.87721800 | -0.06678300 | O                                             | -1.12519400 | -2.93517400 | 0.23533700  |
| O                                             | -0.74404400 | -0.40653300 | 2.01432400  | O                                             | 0.71364200  | -0.66718600 | -1.93644900 |
| O                                             | -1.80414900 | -2.10295900 | 1.24506600  | O                                             | 1.77721600  | -2.30003700 | -1.04623700 |
| O                                             | -2.27932300 | -1.34465600 | 3.21085700  | O                                             | 2.22852900  | -1.70713200 | -3.07336800 |
| O                                             | 0.86530600  | -4.86129400 | -0.84379200 | O                                             | -0.81787400 | -4.79907200 | 1.28397600  |
| O                                             | 0.48554000  | 0.05458900  | -4.28509300 | O                                             | -0.53572500 | 0.22869600  | 4.24204900  |
| N                                             | 0.53365900  | -3.71928300 | -0.72165400 | N                                             | -0.48491900 | -3.67595600 | 1.04584000  |
| N                                             | -1.63342600 | -1.29289500 | 2.19804500  | N                                             | 1.59776200  | -1.57046100 | -2.05957800 |
| N                                             | 0.25598000  | -0.24925900 | -3.14906400 | N                                             | -0.28547400 | -0.13280800 | 3.12712600  |
| C                                             | 1.13087300  | 3.61083700  | -0.52234200 | C                                             | -1.09239800 | 3.52674000  | 0.49133600  |
| C                                             | -0.02880500 | 4.32546800  | -0.75480700 | C                                             | 0.06873600  | 4.23745400  | 0.72876800  |
| C                                             | 1.01753100  | 2.26262700  | -0.20188600 | C                                             | -0.98071400 | 2.17708100  | 0.17629400  |
| C                                             | -1.28019700 | 2.35721700  | -0.26284100 | C                                             | 1.31841800  | 2.26592900  | 0.24469800  |
| H                                             | 2.11165000  | 4.05973000  | -0.59827500 | H                                             | -2.07204500 | 3.97918200  | 0.56122100  |
| H                                             | 0.01988400  | 5.36858500  | -1.04417200 | H                                             | 0.02183900  | 5.28100900  | 1.01687600  |
| C                                             | -1.25891100 | 3.70168800  | -0.60597400 | C                                             | 1.29846100  | 3.61056300  | 0.58705800  |
| H                                             | -2.17711100 | 4.24596700  | -0.77815300 | H                                             | 2.21599300  | 4.15377800  | 0.76507800  |
| N                                             | 1.97499300  | 0.14698100  | 0.37206000  | N                                             | -1.93058400 | 0.05106400  | -0.36009500 |
| N                                             | 2.98059700  | -0.60544000 | 0.72671400  | N                                             | -2.93028600 | -0.71284900 | -0.70397000 |
| N                                             | 3.39731400  | 1.99312100  | 0.07696100  | N                                             | -3.35823100 | 1.90276100  | -0.12888900 |
| C                                             | 2.20158900  | 1.42743100  | 0.09072300  | C                                             | -2.16269800 | 1.33751900  | -0.11431000 |
| C                                             | 4.20845300  | -0.10919800 | 0.76091200  | C                                             | -4.15886900 | -0.21925900 | -0.76434600 |
| C                                             | 4.43390200  | 1.22804600  | 0.37681600  | C                                             | -4.39023900 | 1.12783400  | -0.42105100 |
| C                                             | 5.94626100  | 2.81274300  | 1.49847400  | C                                             | -5.88963800 | 2.67596500  | -1.60887700 |
| H                                             | 6.91655700  | 3.31328100  | 1.45222200  | H                                             | -6.86069600 | 3.17683000  | -1.59005900 |
| H                                             | 5.87361700  | 2.29858700  | 2.45897100  | H                                             | -5.80477800 | 2.13269500  | -2.55220100 |
| H                                             | 5.16399400  | 3.57336500  | 1.46290500  | H                                             | -5.10825100 | 3.43802500  | -1.58690900 |
| C                                             | 5.96043500  | 2.63817300  | -0.98881200 | C                                             | -5.93465900 | 2.57754900  | 0.88216100  |
| H                                             | 5.81333600  | 1.99696600  | -1.86114000 | H                                             | -5.79719900 | 1.96363500  | 1.77544600  |
| H                                             | 6.96784700  | 3.05808400  | -1.04267600 | H                                             | -6.94322300 | 2.99717300  | 0.91103800  |
| H                                             | 5.24175200  | 3.45615500  | -1.04200100 | H                                             | -5.21785900 | 3.39808700  | 0.91876100  |
| C                                             | 5.47715500  | -2.09620600 | 0.05366300  | C                                             | -5.43379200 | -2.18414300 | -0.00913600 |

|                                               |             |             |             |                                               |             |             |             |
|-----------------------------------------------|-------------|-------------|-------------|-----------------------------------------------|-------------|-------------|-------------|
| H                                             | 6.23074800  | -2.83182300 | 0.34584900  | H                                             | -6.18241000 | -2.93041800 | -0.28674100 |
| H                                             | 5.79768900  | -1.63159100 | -0.88158200 | H                                             | -5.76627800 | -1.69079100 | 0.90699100  |
| H                                             | 4.53695500  | -2.61798100 | -0.13407000 | H                                             | -4.49504300 | -2.69747000 | 0.20691000  |
| C                                             | 4.87646600  | -1.80653000 | 2.45357300  | C                                             | -4.80751100 | -1.96931100 | -2.41062900 |
| H                                             | 5.67755200  | -2.48315300 | 2.76160200  | H                                             | -5.60468000 | -2.65632200 | -2.70556500 |
| H                                             | 3.97205200  | -2.39142800 | 2.28680500  | H                                             | -3.90416100 | -2.54731500 | -2.21652600 |
| H                                             | 4.68957500  | -1.10791800 | 3.27348000  | H                                             | -4.61270200 | -1.29652700 | -3.25004700 |
| C                                             | 5.80982400  | 1.84868900  | 0.31192400  | C                                             | -5.76733400 | 1.74877800  | -0.39177500 |
| C                                             | 5.29730700  | -1.06983000 | 1.18090500  | C                                             | -5.24236900 | -1.19361500 | -1.16619800 |
| C                                             | 6.59344500  | -0.29426800 | 1.43607200  | C                                             | -6.53634700 | -0.42800100 | -1.45953700 |
| C                                             | 6.87630100  | 0.74981500  | 0.37211900  | C                                             | -6.83238900 | 0.64767100  | -0.43133100 |
| H                                             | 7.41960600  | -1.00837300 | 1.49459300  | H                                             | -7.36107600 | -1.14469400 | -1.50551900 |
| H                                             | 6.53662200  | 0.18424200  | 2.41978100  | H                                             | -6.46881700 | 0.02023600  | -2.45673600 |
| H                                             | 6.94391900  | 0.26768900  | -0.60868900 | H                                             | -6.91149600 | 0.19559800  | 0.56282100  |
| H                                             | 7.84836100  | 1.22010000  | 0.54699600  | H                                             | -7.80254100 | 1.11154700  | -0.63208800 |
| C                                             | -2.50831200 | 1.49703800  | -0.10965400 | C                                             | 2.54117000  | 1.39837100  | 0.08270400  |
| O                                             | -2.41392900 | 0.32109700  | -0.46423600 | O                                             | 2.43305100  | 0.21446900  | 0.40208600  |
| C                                             | -4.77740000 | 1.09656300  | 0.44663200  | C                                             | 4.80594000  | 0.97978200  | -0.47129100 |
| C                                             | -4.98559400 | 0.31445100  | 1.57287400  | C                                             | 4.97746500  | 0.18873700  | -1.59774900 |
| C                                             | -5.65250200 | 1.02772800  | -0.62320000 | C                                             | 5.70182300  | 0.90090700  | 0.58025700  |
| C                                             | -6.07726300 | -0.53376500 | 1.62104400  | C                                             | 6.05336400  | -0.67763900 | -1.66511400 |
| H                                             | -4.28116600 | 0.34231100  | 2.39719700  | H                                             | 4.25507500  | 0.22449200  | -2.40600300 |
| C                                             | -6.74439700 | 0.17566100  | -0.56065400 | C                                             | 6.77871800  | 0.03109300  | 0.49822400  |
| H                                             | -5.47259900 | 1.62874300  | -1.50711700 | H                                             | 5.54922800  | 1.50670000  | 1.46602100  |
| H                                             | -6.22273000 | -1.15643000 | 2.49721700  | H                                             | 6.16939400  | -1.30755600 | -2.54049100 |
| C                                             | -6.97415000 | -0.61873400 | 0.55777000  | C                                             | 6.97168700  | -0.77182700 | -0.62077500 |
| H                                             | -7.42545100 | 0.12226100  | -1.40325300 | H                                             | 7.47624400  | -0.03013000 | 1.32668700  |
| C                                             | -8.13207600 | -1.56765900 | 0.60971900  | C                                             | 8.11324800  | -1.73902700 | -0.69363200 |
| H                                             | -8.86730000 | -1.34303200 | -0.16412800 | H                                             | 8.85592000  | -1.53882700 | 0.07974400  |
| H                                             | -8.63295000 | -1.53104600 | 1.57951400  | H                                             | 8.61008900  | -1.69494800 | -1.66530700 |
| H                                             | -7.79377300 | -2.59694900 | 0.45849000  | H                                             | 7.75862500  | -2.76485800 | -0.55756300 |
| C                                             | -3.78421000 | 3.23043800  | 1.15399400  | C                                             | 3.85187000  | 3.14736100  | -1.12655900 |
| C                                             | -4.71399700 | 4.23600200  | 0.50473600  | C                                             | 4.77594400  | 4.13101900  | -0.43659200 |
| H                                             | -4.17175700 | 2.95545200  | 2.13924000  | H                                             | 4.25727000  | 2.89207900  | -2.10996900 |
| H                                             | -2.79340600 | 3.65084600  | 1.31903300  | H                                             | 2.86787300  | 3.57965800  | -1.30160700 |
| H                                             | -4.79979500 | 5.12237800  | 1.13659700  | H                                             | 4.87697200  | 5.03267700  | -1.04418500 |
| H                                             | -4.35447600 | 4.54969200  | -0.47828200 | H                                             | 4.40188300  | 4.42135500  | 0.54816800  |
| H                                             | -5.71270300 | 3.81553800  | 0.37622800  | H                                             | 5.77019900  | 3.70191000  | -0.30257300 |
| N                                             | -3.64990200 | 1.98824300  | 0.39481300  | N                                             | 3.69310000  | 1.88854400  | -0.40038700 |
| <b>Am(L2)(NO<sub>3</sub>)<sub>3</sub>-isI</b> |             |             |             | <b>Eu(L2)(NO<sub>3</sub>)<sub>3</sub>-isI</b> |             |             |             |
| Am                                            | -0.00886000 | -0.52952000 | 0.39794500  | Eu                                            | -0.01633900 | -0.52834500 | 0.42406100  |
| N                                             | 0.59872100  | 2.08083100  | 0.27003300  | N                                             | 0.60373300  | 2.04443400  | 0.26342000  |
| N                                             | -1.96141500 | 1.25148400  | 0.55165500  | N                                             | -1.94628200 | 1.23011500  | 0.55455700  |

|   |             |             |             |   |             |             |             |
|---|-------------|-------------|-------------|---|-------------|-------------|-------------|
| O | -1.66523000 | -0.78049800 | -1.53416600 | O | -1.66239800 | -0.81094900 | -1.49898400 |
| O | 0.04853700  | 0.41376200  | -1.98356800 | O | 0.06901800  | 0.35771100  | -1.93800600 |
| O | 0.68969900  | -2.75625900 | 1.19415300  | O | 0.66444700  | -2.67828400 | 1.31393800  |
| O | 0.69705800  | -2.48867600 | -0.93102300 | O | 0.64617300  | -2.50936600 | -0.81850000 |
| O | 1.56448800  | -0.09039600 | 2.30784500  | O | 1.56974300  | -0.02070500 | 2.29729200  |
| O | -0.48672600 | 0.32469200  | 2.73611800  | O | -0.49475100 | 0.30059300  | 2.73325300  |
| O | 1.01610300  | 0.69448200  | 4.24417600  | O | 0.99432200  | 0.73074700  | 4.23862500  |
| O | 1.49496600  | -4.30575500 | -0.07879000 | O | 1.43160900  | -4.29676100 | 0.10513100  |
| O | -1.53812900 | 0.22850700  | -3.43807400 | O | -1.49206000 | 0.16183400  | -3.41843900 |
| N | 0.97937300  | -3.22876100 | 0.05469600  | N | 0.93295400  | -3.20805500 | 0.19508400  |
| N | 0.70952200  | 0.32156300  | 3.14366000  | N | 0.70211900  | 0.34874900  | 3.13658100  |
| N | -1.06251200 | -0.03897900 | -2.36220600 | N | -1.04025900 | -0.09112600 | -2.32861400 |
| C | -3.97338100 | 2.91051200  | 1.42147400  | C | -3.97134800 | 2.90021200  | 1.36826800  |
| C | -3.17537400 | 0.76557400  | 0.78588500  | C | -3.16083700 | 0.74462600  | 0.78632800  |
| C | 2.21121700  | 3.77910200  | -0.19468800 | C | 2.23469700  | 3.72542700  | -0.19740200 |
| C | 1.24075600  | 4.75022600  | -0.04495200 | C | 1.27363800  | 4.70659800  | -0.05296100 |
| C | -3.24840800 | -0.73750200 | 0.71442200  | C | -3.22276900 | -0.75984100 | 0.74004300  |
| C | 1.84132100  | 2.44887900  | -0.04004600 | C | 1.85135600  | 2.39905200  | -0.04157300 |
| C | -4.22231400 | 1.56434800  | 1.22128900  | C | -4.21407100 | 1.54903600  | 1.19550300  |
| C | -1.71879800 | 2.54980700  | 0.71261300  | C | -1.70889600 | 2.53182900  | 0.69117800  |
| C | -0.34284200 | 3.01501900  | 0.41034900  | C | -0.32889800 | 2.98834500  | 0.39651500  |
| H | 3.23695900  | 4.01845500  | -0.43726600 | H | 3.26383900  | 3.95401300  | -0.43592300 |
| H | -5.19779500 | 1.14057000  | 1.41455000  | H | -5.19009900 | 1.12677800  | 1.38900900  |
| H | 1.48628000  | 5.79791300  | -0.17214700 | H | 1.53065700  | 5.75159200  | -0.17963900 |
| H | -4.75668900 | 3.56213000  | 1.79003400  | H | -4.76068700 | 3.55699000  | 1.71410800  |
| O | -2.25861000 | -1.37435800 | 1.08233200  | O | -2.22242200 | -1.38066900 | 1.10482700  |
| N | -4.37828100 | -1.35080100 | 0.33512600  | N | -4.35119800 | -1.39058600 | 0.38480900  |
| C | -5.39355600 | -0.70403900 | -0.42683100 | C | -5.37955300 | -0.76939000 | -0.38035600 |
| C | -6.71581100 | -0.74274200 | -0.00158900 | C | -6.69871700 | -0.81476900 | 0.05830100  |
| C | -5.07211000 | -0.08978800 | -1.63077600 | C | -5.07572400 | -0.17187100 | -1.59565100 |
| C | -7.70372300 | -0.14650400 | -0.76722000 | C | -7.69894400 | -0.24254500 | -0.70701800 |
| H | -6.96863000 | -1.23660300 | 0.93019100  | H | -6.93664500 | -1.29382600 | 1.00167200  |
| C | -6.07038100 | 0.51269800  | -2.37949500 | C | -6.08833600 | 0.40843600  | -2.34538100 |
| H | -4.04699300 | -0.11252200 | -1.98654100 | H | -4.05303000 | -0.18680900 | -1.95886900 |
| H | -8.73378800 | -0.18429800 | -0.42808000 | H | -8.72524900 | -0.28383200 | -0.35642300 |
| H | -5.80809300 | 0.98422400  | -3.32082400 | H | -5.83956400 | 0.87012000  | -3.29504500 |
| C | -8.46731900 | 1.16967600  | -2.77255400 | C | -8.50222100 | 1.01621900  | -2.73038900 |
| H | -8.23582800 | 1.13778000  | -3.83857200 | H | -8.14183400 | 1.31233600  | -3.71622300 |
| H | -8.56696900 | 2.22306800  | -2.49231400 | H | -8.89457100 | 1.90996800  | -2.23612800 |
| H | -9.43911300 | 0.69745000  | -2.61900700 | H | -9.34088200 | 0.32935900  | -2.86756000 |
| C | -7.39876600 | 0.50034000  | -1.96325500 | C | -7.41157200 | 0.38706800  | -1.91835100 |
| C | -4.40426700 | -2.81938300 | 0.41835400  | C | -4.36043200 | -2.85778500 | 0.49360200  |
| C | -4.61548800 | -3.33158800 | 1.82910000  | C | -4.54078700 | -3.34771600 | 1.91645300  |
| H | -3.45734000 | -3.18797500 | 0.01814700  | H | -3.41736500 | -3.22393000 | 0.08200700  |

|                                               |             |             |             |                                               |             |             |             |
|-----------------------------------------------|-------------|-------------|-------------|-----------------------------------------------|-------------|-------------|-------------|
| H                                             | -5.20310400 | -3.15084200 | -0.24457100 | H                                             | -5.16788500 | -3.20846800 | -0.14870300 |
| H                                             | -4.61395200 | -4.42358100 | 1.82446700  | H                                             | -4.52928000 | -4.43958000 | 1.93013000  |
| H                                             | -3.81342100 | -2.99773400 | 2.48786300  | H                                             | -3.72990200 | -2.99552500 | 2.55448700  |
| H                                             | -5.57122000 | -2.99649000 | 2.23855300  | H                                             | -5.49194700 | -3.01413000 | 2.33765600  |
| C                                             | -2.71362100 | 3.41497800  | 1.16180800  | C                                             | -2.71085800 | 3.40369300  | 1.11006900  |
| C                                             | -0.05370600 | 4.36815900  | 0.25146900  | C                                             | -0.02610900 | 4.33827000  | 0.23802700  |
| H                                             | -2.50365900 | 4.46068600  | 1.33836900  | H                                             | -2.50677600 | 4.45411600  | 1.26397800  |
| H                                             | -0.83180700 | 5.11370500  | 0.33743400  | H                                             | -0.79660200 | 5.09193300  | 0.32155400  |
| N                                             | 3.25537400  | -0.84948000 | -0.42434000 | N                                             | 3.23418800  | -0.91370900 | -0.40032100 |
| N                                             | 2.40628300  | 0.12507400  | -0.24575900 | N                                             | 2.39357300  | 0.06942800  | -0.23389800 |
| C                                             | 4.54004800  | -0.58897600 | -0.60816500 | C                                             | 4.52272800  | -0.66694300 | -0.57859100 |
| C                                             | 5.44044200  | -1.78833600 | -0.79991200 | C                                             | 5.41327600  | -1.87644500 | -0.75184600 |
| C                                             | 6.80684500  | -1.32306800 | -1.31347400 | C                                             | 6.78491400  | -1.42957800 | -1.26761200 |
| C                                             | 7.33037100  | -0.10024300 | -0.58447700 | C                                             | 7.31813700  | -0.20355700 | -0.55105300 |
| C                                             | 6.43972300  | 1.13355800  | -0.76559200 | C                                             | 6.43885400  | 1.03619100  | -0.74657100 |
| C                                             | 4.98924100  | 0.74784100  | -0.58441100 | C                                             | 4.98435200  | 0.66531500  | -0.56543300 |
| N                                             | 4.11143700  | 1.72083600  | -0.41393100 | N                                             | 4.11507800  | 1.64786900  | -0.40583500 |
| C                                             | 2.84280800  | 1.37762600  | -0.24419400 | C                                             | 2.84296700  | 1.31749100  | -0.23779500 |
| H                                             | 6.73167100  | -1.11213100 | -2.38558400 | H                                             | 6.71368900  | -1.22983200 | -2.34215400 |
| H                                             | 7.51356200  | -2.15219700 | -1.21748900 | H                                             | 7.48393300  | -2.26395300 | -1.16096300 |
| H                                             | 8.33882800  | 0.14737300  | -0.92901400 | H                                             | 8.32925500  | 0.03129600  | -0.89676500 |
| H                                             | 7.41927700  | -0.31818800 | 0.48503100  | H                                             | 7.40369800  | -0.41082400 | 0.52082600  |
| C                                             | 6.59272300  | 1.71974600  | -2.17600500 | C                                             | 6.60068800  | 1.60693500  | -2.16228000 |
| H                                             | 6.34899400  | 0.99362200  | -2.95403200 | H                                             | 6.35288900  | 0.87508600  | -2.93365000 |
| H                                             | 5.93523600  | 2.58199000  | -2.30320400 | H                                             | 5.95078300  | 2.47332000  | -2.29994800 |
| H                                             | 7.62453400  | 2.04742900  | -2.32578600 | H                                             | 7.63560100  | 1.92449200  | -2.31257200 |
| C                                             | 6.82859400  | 2.19889200  | 0.25915700  | C                                             | 6.83486000  | 2.10803100  | 0.26857100  |
| H                                             | 6.24009600  | 3.10735100  | 0.13059000  | H                                             | 6.25515300  | 3.02054100  | 0.12923400  |
| H                                             | 6.68108700  | 1.83860900  | 1.28012100  | H                                             | 6.68097500  | 1.75942000  | 1.29263500  |
| H                                             | 7.88533600  | 2.44945800  | 0.13740800  | H                                             | 7.89424000  | 2.34758700  | 0.14742900  |
| C                                             | 4.81658000  | -2.75542600 | -1.80794500 | C                                             | 4.78419500  | -2.85208400 | -1.74817500 |
| H                                             | 3.85872400  | -3.13917200 | -1.45713000 | H                                             | 3.82159300  | -3.22129700 | -1.39475100 |
| H                                             | 4.65608200  | -2.26969900 | -2.77396800 | H                                             | 4.63136700  | -2.37877500 | -2.72157800 |
| H                                             | 5.49360800  | -3.59975300 | -1.96158800 | H                                             | 5.45372900  | -3.70486300 | -1.88735300 |
| C                                             | 5.57270600  | -2.49953500 | 0.55379000  | C                                             | 5.53556000  | -2.57025300 | 0.61183400  |
| H                                             | 6.03176200  | -1.86290600 | 1.31370100  | H                                             | 5.99712400  | -1.92696600 | 1.36454600  |
| H                                             | 4.59060400  | -2.80466000 | 0.91903900  | H                                             | 4.54981300  | -2.86235800 | 0.97801500  |
| H                                             | 6.18962500  | -3.39410400 | 0.43746900  | H                                             | 6.14564000  | -3.47128700 | 0.50998800  |
| <b>Am(L2)(NO<sub>3</sub>)<sub>3</sub>-is2</b> |             |             |             | <b>Eu(L2)(NO<sub>3</sub>)<sub>3</sub>-is2</b> |             |             |             |
| Am                                            | -0.26451600 | 0.00143300  | -0.29725200 | Eu                                            | -0.28278700 | 0.05780900  | -0.33491500 |
| N                                             | 1.05123800  | 2.31753300  | 0.10213700  | N                                             | 1.01153500  | 2.32276700  | 0.11271700  |
| N                                             | -1.64988500 | 2.24482200  | 0.02744700  | N                                             | -1.66169900 | 2.24927000  | 0.03123300  |
| O                                             | -0.66588200 | 1.36677000  | -2.39934600 | O                                             | -0.82871500 | 1.15051000  | -2.47748900 |

|   |             |             |             |   |             |             |             |
|---|-------------|-------------|-------------|---|-------------|-------------|-------------|
| O | 1.18226900  | 0.29834300  | -2.33004000 | O | 1.25009500  | 0.69835700  | -2.29330000 |
| O | 0.02118100  | -2.23201200 | 0.72083000  | O | -0.36186000 | -2.25379600 | 0.41169600  |
| O | -0.23852500 | -2.19915100 | -1.40430500 | O | 0.07081100  | -1.93968900 | -1.65917700 |
| O | 0.26811900  | 0.49376200  | 2.15159200  | O | 0.35568600  | 0.29869300  | 2.06345300  |
| O | -1.74386900 | -0.12716800 | 1.78921900  | O | -1.73455400 | -0.06375500 | 1.82901200  |
| O | -1.11685200 | 0.34072600  | 3.80183600  | O | -0.91101000 | 0.19072000  | 3.80910500  |
| O | 0.22285800  | -4.06112400 | -0.40964200 | O | 0.15395700  | -3.93738700 | -0.84024500 |
| O | 0.74094900  | 1.55846000  | -4.02816900 | O | 0.53019200  | 1.70324900  | -4.06437600 |
| N | 0.00776200  | -2.87974300 | -0.36558800 | N | -0.04052400 | -2.76055700 | -0.70262500 |
| N | -0.86932800 | 0.23713800  | 2.62779100  | N | -0.77165200 | 0.14101200  | 2.61351400  |
| N | 0.43004000  | 1.09089000  | -2.96547100 | N | 0.33070700  | 1.19972700  | -2.98971700 |
| C | -3.17020600 | 4.46495400  | -0.53698400 | C | -3.22707100 | 4.46579400  | -0.39577700 |
| C | -2.96038400 | 2.12913800  | -0.15260200 | C | -2.97725900 | 2.12067200  | -0.10000000 |
| C | 3.08780200  | 3.43780200  | 0.64710100  | C | 3.07835000  | 3.43296600  | 0.54247500  |
| C | 2.41391100  | 4.64062400  | 0.72569300  | C | 2.42133200  | 4.64621500  | 0.60507500  |
| C | -3.43101300 | 0.69738600  | -0.20062300 | C | -3.42696800 | 0.68241700  | -0.15654000 |
| C | 2.36180200  | 2.29305300  | 0.34024400  | C | 2.33021800  | 2.28756800  | 0.29775700  |
| C | -3.76760900 | 3.21942200  | -0.43857700 | C | -3.80591900 | 3.20953500  | -0.32160500 |
| C | -1.06933300 | 3.43895300  | -0.04001800 | C | -1.09836100 | 3.45267200  | -0.00583900 |
| C | 0.39598000  | 3.47613600  | 0.18559000  | C | 0.37317300  | 3.49127900  | 0.17666300  |
| H | 4.15066400  | 3.35751100  | 0.82649500  | H | 4.14631400  | 3.34606700  | 0.68443200  |
| H | -4.82758500 | 3.09115500  | -0.61330400 | H | -4.86959900 | 3.07475800  | -0.46462100 |
| H | 2.94312200  | 5.55262500  | 0.97524300  | H | 2.97047100  | 5.55925200  | 0.80224300  |
| H | -3.76127100 | 5.33714900  | -0.79014300 | H | -3.83752200 | 5.33821800  | -0.59672400 |
| O | -2.71374500 | -0.09917200 | -0.80712700 | O | -2.69311400 | -0.09958800 | -0.76008300 |
| N | -4.59533200 | 0.34050000  | 0.35696800  | N | -4.58851100 | 0.30257200  | 0.39265800  |
| C | -4.98892200 | -1.03619500 | 0.23120300  | C | -4.95656100 | -1.08015900 | 0.25106900  |
| C | -5.85966300 | -1.41894700 | -0.77330400 | C | -5.86820700 | -1.45718600 | -0.71857500 |
| C | -4.49811800 | -1.97340200 | 1.12927000  | C | -4.39782300 | -2.02840600 | 1.09656000  |
| C | -6.24696800 | -2.74704300 | -0.87549500 | C | -6.23050500 | -2.79135100 | -0.83677700 |
| H | -6.22428900 | -0.68255200 | -1.48027100 | H | -6.28328700 | -0.71227600 | -1.38779000 |
| C | -4.89145900 | -3.29452500 | 1.01442300  | C | -4.76540000 | -3.35498300 | 0.96479300  |
| H | -3.78660500 | -1.66653300 | 1.88801600  | H | -3.65445200 | -1.72434400 | 1.82519300  |
| H | -6.92694900 | -3.04366100 | -1.66705000 | H | -6.94282600 | -3.08367300 | -1.60100600 |
| H | -4.49398000 | -4.02680800 | 1.70939600  | H | -4.31292500 | -4.09557700 | 1.61587200  |
| C | -6.16020200 | -5.14543400 | -0.11663600 | C | -6.05275300 | -5.20530300 | -0.14536500 |
| H | -6.44703100 | -5.56741700 | 0.84930600  | H | -6.34774700 | -5.63732500 | 0.81399200  |
| H | -5.32326800 | -5.74031200 | -0.49381700 | H | -5.20196100 | -5.78592400 | -0.51304500 |
| H | -6.99595900 | -5.27221500 | -0.80616000 | H | -6.87718900 | -5.33968200 | -0.84688800 |
| C | -5.77004500 | -3.70463800 | 0.01257100  | C | -5.68637900 | -3.75966400 | -0.00088500 |
| C | -5.28272600 | 1.11361000  | 1.39038800  | C | -5.28335800 | 1.04606800  | 1.44315900  |
| C | -6.72004400 | 1.44117800  | 1.04128100  | C | -6.72503500 | 1.36663800  | 1.10583200  |
| H | -4.70855500 | 2.01819700  | 1.58568800  | H | -4.71792100 | 1.95131400  | 1.65943000  |
| H | -5.24575000 | 0.52102800  | 2.30933300  | H | -5.23806500 | 0.43259700  | 2.34796000  |

|                                               |             |             |             |                                               |             |             |             |
|-----------------------------------------------|-------------|-------------|-------------|-----------------------------------------------|-------------|-------------|-------------|
| H                                             | -7.18511200 | 1.98464400  | 1.86634900  | H                                             | -7.19125700 | 1.89048500  | 1.94291200  |
| H                                             | -6.78834400 | 2.06045800  | 0.14352400  | H                                             | -6.80386800 | 2.00136600  | 0.21973600  |
| H                                             | -7.29876700 | 0.53232700  | 0.86834700  | H                                             | -7.29629000 | 0.45587400  | 0.91912600  |
| C                                             | -1.80935100 | 4.58315900  | -0.33035700 | C                                             | -1.86235000 | 4.59679400  | -0.22640400 |
| C                                             | 1.05019700  | 4.66375400  | 0.50114200  | C                                             | 1.05105000  | 4.68104400  | 0.42621200  |
| H                                             | -1.32707200 | 5.54555900  | -0.43263500 | H                                             | -1.39878000 | 5.57073200  | -0.30049100 |
| H                                             | 0.49934900  | 5.58971000  | 0.59347500  | H                                             | 0.51760200  | 5.61876900  | 0.49806200  |
| N                                             | 2.84931900  | -1.26565200 | -0.00156400 | N                                             | 2.77805900  | -1.28169500 | -0.00032500 |
| N                                             | 2.28450300  | -0.09519900 | 0.11333600  | N                                             | 2.22924200  | -0.10178200 | 0.07614800  |
| C                                             | 4.16474900  | -1.38266100 | 0.08839000  | C                                             | 4.09146400  | -1.41358100 | 0.10830500  |
| C                                             | 4.72081000  | -2.77864700 | -0.07714100 | C                                             | 4.63129100  | -2.82032800 | -0.01679100 |
| C                                             | 6.24368500  | -2.70591600 | -0.22906300 | C                                             | 6.15646900  | -2.77181500 | -0.15626100 |
| C                                             | 6.89183200  | -1.74427600 | 0.74875000  | C                                             | 6.80956800  | -1.79054600 | 0.79817100  |
| C                                             | 6.44604200  | -0.29253600 | 0.54447600  | C                                             | 6.38349100  | -0.34015500 | 0.54811800  |
| C                                             | 4.94694100  | -0.24038300 | 0.35714200  | C                                             | 4.88531900  | -0.27490500 | 0.35608300  |
| N                                             | 4.35948300  | 0.94120200  | 0.42938400  | N                                             | 4.31102600  | 0.91424200  | 0.40782500  |
| C                                             | 3.04265800  | 0.97936800  | 0.28686500  | C                                             | 2.99650800  | 0.96599900  | 0.25209000  |
| H                                             | 6.48617200  | -2.41067700 | -1.25545100 | H                                             | 6.41160500  | -2.51012300 | -1.18855100 |
| H                                             | 6.65311300  | -3.71168000 | -0.09912700 | H                                             | 6.55106900  | -3.77874900 | 0.00647000  |
| H                                             | 7.98159700  | -1.78730500 | 0.66216300  | H                                             | 7.89929900  | -1.84978300 | 0.72095000  |
| H                                             | 6.65596000  | -2.04670800 | 1.77465400  | H                                             | 6.56265800  | -2.05949900 | 1.83084800  |
| C                                             | 7.09523800  | 0.31133500  | -0.70841700 | C                                             | 7.04188000  | 0.21610600  | -0.72191900 |
| H                                             | 6.86063300  | -0.25765400 | -1.61007600 | H                                             | 6.79963100  | -0.37612300 | -1.60640400 |
| H                                             | 6.75012700  | 1.33588900  | -0.85929500 | H                                             | 6.71133800  | 1.24042100  | -0.90410500 |
| H                                             | 8.18120800  | 0.32616200  | -0.58634100 | H                                             | 8.12792800  | 0.21945800  | -0.59944300 |
| C                                             | 6.84664600  | 0.54183800  | 1.76112000  | C                                             | 6.79414100  | 0.52559800  | 1.73902000  |
| H                                             | 6.57726300  | 1.58989600  | 1.62894700  | H                                             | 6.53976300  | 1.57275800  | 1.57451600  |
| H                                             | 6.36259300  | 0.17565600  | 2.66986300  | H                                             | 6.30361300  | 0.19450600  | 2.65769700  |
| H                                             | 7.92813900  | 0.47766100  | 1.90440700  | H                                             | 7.87443400  | 0.45048800  | 1.88604500  |
| C                                             | 4.11354100  | -3.43754700 | -1.31741200 | C                                             | 4.02823700  | -3.50216100 | -1.24687400 |
| H                                             | 3.03497900  | -3.55806000 | -1.21863400 | H                                             | 2.94666400  | -3.60455300 | -1.16141200 |
| H                                             | 4.31134400  | -2.84865900 | -2.21657900 | H                                             | 4.24583200  | -2.93899200 | -2.15784900 |
| H                                             | 4.55981500  | -4.42610700 | -1.45330600 | H                                             | 4.46248700  | -4.49979700 | -1.35255200 |
| C                                             | 4.32642700  | -3.59560800 | 1.16073200  | C                                             | 4.21668100  | -3.60108900 | 1.23744000  |
| H                                             | 4.75245000  | -3.18616900 | 2.07984600  | H                                             | 4.64143000  | -3.17510100 | 2.14958000  |
| H                                             | 3.24058400  | -3.61546200 | 1.26989900  | H                                             | 3.13005200  | -3.60301400 | 1.33899400  |
| H                                             | 4.68051500  | -4.62336300 | 1.04777600  | H                                             | 4.55652300  | -4.63629400 | 1.15247100  |
| <b>Am(L3)(NO<sub>3</sub>)<sub>3</sub>-isI</b> |             |             |             | <b>Eu(L3)(NO<sub>3</sub>)<sub>3</sub>-isI</b> |             |             |             |
| Am                                            | -0.04392500 | -0.60438700 | 0.52666400  | Eu                                            | -0.04674400 | -0.60656800 | 0.58750300  |
| O                                             | 0.38209400  | 0.57859800  | 2.72659300  | O                                             | 0.47739900  | 0.14599300  | 2.86942400  |
| O                                             | -1.65207500 | 0.05289000  | 2.33966300  | O                                             | -1.56574200 | 0.47736500  | 2.34549000  |
| O                                             | -0.77463600 | -2.69456100 | -0.57049800 | O                                             | -0.42156800 | -2.88186700 | -0.16716800 |
| O                                             | -0.71890700 | -2.73196800 | 1.57041600  | O                                             | -1.16539000 | -2.39807600 | 1.77908000  |

|   |             |             |             |   |             |             |             |
|---|-------------|-------------|-------------|---|-------------|-------------|-------------|
| O | -0.05029100 | -0.00697300 | -1.96482900 | O | -0.30569100 | -0.26955900 | -1.88004000 |
| O | 1.64167700  | -1.14465000 | -1.32529500 | O | 1.60213900  | -1.07746800 | -1.36913800 |
| O | 1.53349100  | -0.44953600 | -3.36602600 | O | 1.16051800  | -0.60768100 | -3.42995000 |
| O | -1.52630600 | -4.42001400 | 0.48931400  | O | -1.60045700 | -4.33166400 | 0.91861500  |
| O | -1.14921500 | 1.10748200  | 4.15671700  | O | -0.85918900 | 1.05758500  | 4.30230800  |
| N | -1.02543200 | -3.32830100 | 0.49528900  | N | -1.08301000 | -3.25118400 | 0.84847900  |
| N | 1.05207500  | -0.53334700 | -2.26320200 | N | 0.83148800  | -0.65424100 | -2.27087600 |
| N | -0.81840800 | 0.59775500  | 3.12007900  | N | -0.66292500 | 0.57771200  | 3.21691300  |
| C | 3.21188100  | -0.78800200 | 0.91941800  | C | 3.18869900  | -0.86127600 | 0.89042100  |
| O | 2.20552300  | -1.34293100 | 1.36496200  | O | 2.16930100  | -1.41706800 | 1.29944200  |
| N | 4.34708600  | -1.46298400 | 0.68150300  | N | 4.31720400  | -1.54610200 | 0.64604600  |
| C | 5.37201900  | -0.97866700 | -0.18154100 | C | 5.35004500  | -1.05984200 | -0.20559000 |
| C | 5.06760100  | -0.59552500 | -1.48133100 | C | 5.04995700  | -0.64026200 | -1.49525900 |
| C | 6.68810100  | -0.92993500 | 0.26364300  | C | 6.66744300  | -1.04504800 | 0.23785300  |
| C | 6.07637700  | -0.13462000 | -2.31336000 | C | 6.06527800  | -0.17833300 | -2.31865600 |
| H | 4.04547600  | -0.67458400 | -1.83807500 | H | 4.02425200  | -0.69035100 | -1.84784500 |
| C | 7.68561600  | -0.47773300 | -0.58223100 | C | 7.67129700  | -0.59105800 | -0.59960500 |
| H | 6.92546100  | -1.23116700 | 1.27824500  | H | 6.90077400  | -1.37438300 | 1.24459800  |
| H | 5.82574800  | 0.16572100  | -3.32533200 | H | 5.81930500  | 0.15041600  | -3.32295700 |
| H | 8.70877400  | -0.43597700 | -0.22301800 | H | 8.69571000  | -0.57596600 | -0.24188800 |
| C | 8.48839500  | 0.39061700  | -2.80330500 | C | 8.48578100  | 0.31342200  | -2.80185400 |
| H | 8.94809400  | -0.46018100 | -3.31580200 | H | 8.92855100  | -0.53381100 | -3.33478500 |
| H | 9.28005400  | 0.90709800  | -2.25711500 | H | 9.28800100  | 0.80226300  | -2.24576900 |
| H | 8.10424300  | 1.06463900  | -3.57045200 | H | 8.11297300  | 1.01194200  | -3.55252300 |
| C | 7.39826500  | -0.06891400 | -1.88410800 | C | 7.38901900  | -0.14691200 | -1.89097600 |
| C | 4.37230000  | -2.89351400 | 1.01365600  | C | 4.31080200  | -2.98650800 | 0.93707300  |
| C | 3.91053600  | -3.76904600 | -0.13501700 | C | 3.78102500  | -3.81682900 | -0.21594600 |
| H | 3.73302800  | -3.03086200 | 1.88457500  | H | 3.70072900  | -3.13067300 | 1.82794300  |
| H | 5.39900200  | -3.13363300 | 1.29778600  | H | 5.33994800  | -3.26190200 | 1.17613400  |
| H | 3.93677400  | -4.81676700 | 0.17141700  | H | 3.80385100  | -4.87405800 | 0.05664400  |
| H | 2.89038100  | -3.51995000 | -0.42880700 | H | 2.75207100  | -3.54386700 | -0.45261000 |
| H | 4.55812900  | -3.65385600 | -1.00667800 | H | 4.39114000  | -3.68470300 | -1.11200500 |
| N | -3.32751700 | -0.95035700 | -0.30031100 | N | -3.30190900 | -0.99468000 | -0.23384000 |
| N | -2.45627200 | 0.01765400  | -0.24208100 | N | -2.43902400 | -0.02192500 | -0.15706600 |
| C | -4.60292300 | -0.68740900 | -0.54472300 | C | -4.57123700 | -0.73924200 | -0.51810600 |
| C | -5.53220400 | -1.87935300 | -0.57627000 | C | -5.49508100 | -1.93515400 | -0.56457700 |
| C | -6.98507700 | -1.39301800 | -0.57619400 | C | -6.94980000 | -1.45573700 | -0.60644700 |
| C | -7.22028800 | -0.22748900 | -1.51806200 | C | -7.16577600 | -0.29535000 | -1.55887900 |
| C | -6.42664300 | 1.02455600  | -1.13026400 | C | -6.38735000 | 0.96148900  | -1.15644300 |
| C | -5.00583500 | 0.64182100  | -0.78415800 | C | -4.97186800 | 0.58648400  | -0.78042400 |
| N | -4.11545500 | 1.61392200  | -0.68125300 | N | -4.08489900 | 1.56197300  | -0.67916700 |
| C | -2.86798100 | 1.27146000  | -0.39728500 | C | -2.84422200 | 1.22697000  | -0.35972000 |
| H | -7.26562500 | -1.10828900 | 0.44341700  | H | -7.25917100 | -1.16831300 | 0.40392600  |
| H | -7.63169900 | -2.23332700 | -0.84424700 | H | -7.58475800 | -2.30052900 | -0.88802300 |

|                                               |             |             |             |                                               |             |             |             |
|-----------------------------------------------|-------------|-------------|-------------|-----------------------------------------------|-------------|-------------|-------------|
| H                                             | -8.28282600 | 0.03141600  | -1.54808100 | H                                             | -8.22831900 | -0.04114800 | -1.61676400 |
| H                                             | -6.94890300 | -0.51744300 | -2.53876700 | H                                             | -6.86728300 | -0.58787600 | -2.57130600 |
| C                                             | -7.04040600 | 1.70540900  | 0.10088700  | C                                             | -7.02931400 | 1.64062800  | 0.06123700  |
| H                                             | -7.08541900 | 1.03704800  | 0.96291400  | H                                             | -7.08653900 | 0.97406000  | 0.92390000  |
| H                                             | -6.45190500 | 2.57970100  | 0.38523200  | H                                             | -6.45203400 | 2.51935500  | 0.35496700  |
| H                                             | -8.05688300 | 2.03297500  | -0.13132600 | H                                             | -8.04321300 | 1.96131900  | -0.19109800 |
| C                                             | -6.42877000 | 2.01343100  | -2.29604100 | C                                             | -6.37216100 | 1.94854400  | -2.32346900 |
| H                                             | -5.90239400 | 2.93233300  | -2.03723000 | H                                             | -5.85737600 | 2.87136300  | -2.05576100 |
| H                                             | -5.95292400 | 1.58388500  | -3.18109500 | H                                             | -5.87515200 | 1.52091000  | -3.19772900 |
| H                                             | -7.45996700 | 2.26586800  | -2.55525300 | H                                             | -7.39959300 | 2.19334800  | -2.60411000 |
| C                                             | -5.28846300 | -2.76369900 | 0.64827300  | C                                             | -5.28121300 | -2.80756400 | 0.67425500  |
| H                                             | -4.28022000 | -3.17718200 | 0.64855700  | H                                             | -4.26949100 | -3.21049000 | 0.71405400  |
| H                                             | -5.42903800 | -2.20404500 | 1.57636900  | H                                             | -5.45723000 | -2.24114200 | 1.59213800  |
| H                                             | -6.00088800 | -3.59269000 | 0.63988100  | H                                             | -5.98568300 | -3.64309700 | 0.65046500  |
| C                                             | -5.21986900 | -2.68961000 | -1.84166300 | C                                             | -5.14832900 | -2.75404200 | -1.81514700 |
| H                                             | -5.40069800 | -2.11762200 | -2.75488600 | H                                             | -5.30947900 | -2.19036400 | -2.73714200 |
| H                                             | -4.17445200 | -3.00331600 | -1.83982400 | H                                             | -4.10192000 | -3.06267700 | -1.78645900 |
| H                                             | -5.84840500 | -3.58329700 | -1.86765400 | H                                             | -5.77134100 | -3.65128700 | -1.84897200 |
| N                                             | 1.93179600  | 1.14158000  | 0.47568200  | N                                             | 1.92910300  | 1.09107900  | 0.51212100  |
| N                                             | -0.62277600 | 1.96115800  | 0.04468700  | N                                             | -0.59300500 | 1.91752900  | 0.04411500  |
| C                                             | 2.40524200  | 4.79879600  | 0.40849000  | C                                             | 2.43908700  | 4.74171100  | 0.42671100  |
| C                                             | 1.14426100  | 5.20598000  | 0.13133500  | C                                             | 1.17838200  | 5.15715500  | 0.15596600  |
| C                                             | -1.23706000 | 4.64168000  | -0.30739800 | C                                             | -1.21160700 | 4.60043900  | -0.27979900 |
| C                                             | 4.22575600  | 1.58443600  | 0.91949500  | C                                             | 4.23408300  | 1.50454500  | 0.91733000  |
| C                                             | 3.99949100  | 2.93363600  | 0.82561900  | C                                             | 4.02266300  | 2.85767300  | 0.83468200  |
| C                                             | 3.15050100  | 0.70686500  | 0.72173500  | C                                             | 3.14662300  | 0.63886300  | 0.73224700  |
| C                                             | 0.08275800  | 4.26465300  | -0.01566100 | C                                             | 0.10976800  | 4.22359200  | 0.00635500  |
| C                                             | 2.71241300  | 3.41240600  | 0.54022700  | C                                             | 2.73987000  | 3.35334100  | 0.55750500  |
| C                                             | -2.20474400 | 3.68280300  | -0.44237300 | C                                             | -2.18005400 | 3.64058300  | -0.40978800 |
| C                                             | 0.34064600  | 2.88745800  | 0.13515400  | C                                             | 0.36453200  | 2.84612100  | 0.14893400  |
| C                                             | 1.69213700  | 2.45340600  | 0.38847900  | C                                             | 1.71026400  | 2.40478800  | 0.41283400  |
| H                                             | 5.21157700  | 1.20209200  | 1.14296700  | H                                             | 5.21895500  | 1.11052800  | 1.12407200  |
| H                                             | -3.22988700 | 3.92792400  | -0.68229800 | H                                             | -3.20761900 | 3.88738200  | -0.63766100 |
| H                                             | 4.81054800  | 3.63802400  | 0.97520400  | H                                             | 4.84406800  | 3.55061400  | 0.98125800  |
| H                                             | -1.47775900 | 5.69205600  | -0.43111400 | H                                             | -1.45501600 | 5.65076800  | -0.39849300 |
| H                                             | 3.20489100  | 5.52126500  | 0.52829300  | H                                             | 3.24250100  | 5.46038900  | 0.54404200  |
| H                                             | 0.91752900  | 6.26068600  | 0.02106800  | H                                             | 0.95888000  | 6.21397800  | 0.05121000  |
| C                                             | -1.85293700 | 2.33744400  | -0.25422400 | C                                             | -1.82783000 | 2.29351000  | -0.23367800 |
| <b>Am(L3)(NO<sub>3</sub>)<sub>3</sub>-is2</b> |             |             |             | <b>Eu(L3)(NO<sub>3</sub>)<sub>3</sub>-is2</b> |             |             |             |
| Am                                            | 0.25293100  | -0.15810000 | 0.35164300  | Eu                                            | 0.27218300  | -0.13698000 | 0.33124700  |
| O                                             | 0.93687900  | 0.55102600  | 2.62698400  | O                                             | 0.83345100  | 0.88674500  | 2.49913300  |
| O                                             | -1.16854000 | 0.70634600  | 2.30301500  | O                                             | -1.25900600 | 0.51648700  | 2.28994400  |
| O                                             | 0.22541500  | -2.52463600 | -0.37872100 | O                                             | 0.36990600  | -2.44775700 | -0.41102100 |



|   |             |             |             |   |             |             |             |
|---|-------------|-------------|-------------|---|-------------|-------------|-------------|
| O | -0.28298100 | -2.17993200 | 1.67348000  | O | -0.13162300 | -2.13220300 | 1.64380100  |
| O | -0.45236300 | -0.04782200 | -2.06145800 | O | -0.36955800 | 0.08218800  | -2.06647500 |
| O | 1.66003000  | -0.27286500 | -1.84599900 | O | 1.72425700  | -0.25394000 | -1.82523800 |
| O | 0.79234900  | -0.17733400 | -3.82164600 | O | 0.89969300  | -0.03846700 | -3.80975000 |
| O | -0.49007000 | -4.16068800 | 0.83694000  | O | -0.18886200 | -4.13053000 | 0.82373700  |
| O | -0.34410800 | 1.23159500  | 4.22939100  | O | -0.51430800 | 1.43556100  | 4.09702100  |
| N | -0.19177900 | -3.00238300 | 0.71702700  | N | 0.01077400  | -2.95420800 | 0.69213900  |
| N | 0.67304700  | -0.16887800 | -2.62392500 | N | 0.75934800  | -0.07164100 | -2.61390000 |
| N | -0.20103000 | 0.84259700  | 3.10173000  | N | -0.32601000 | 0.96120400  | 3.00741300  |
| C | 3.45426900  | 0.53001300  | 0.09874300  | C | 3.44055300  | 0.50815800  | 0.14264400  |
| O | 2.73519100  | -0.26628300 | 0.69847300  | O | 2.70668500  | -0.26788500 | 0.75218300  |
| N | 4.61605400  | 0.16251300  | -0.46451400 | N | 4.60805200  | 0.12237400  | -0.39368700 |
| C | 4.99592000  | -1.21741800 | -0.32683800 | C | 4.97793300  | -1.25641200 | -0.22219600 |
| C | 5.91516500  | -1.58883000 | 0.63762400  | C | 5.89807700  | -1.61025100 | 0.74797700  |
| C | 4.44185900  | -2.16872400 | -1.17207200 | C | 4.41226500  | -2.22476500 | -1.04014400 |
| C | 6.28991800  | -2.92007300 | 0.75059300  | C | 6.26232800  | -2.94129700 | 0.89414400  |
| H | 6.32636300  | -0.84186400 | 1.30691900  | H | 6.31796800  | -0.84967700 | 1.39623100  |
| C | 4.82204600  | -3.49221100 | -1.04602100 | C | 4.78150700  | -3.54766100 | -0.88053200 |
| H | 3.69201000  | -1.87008100 | -1.89647100 | H | 3.66240700  | -1.93845500 | -1.76944700 |
| H | 7.00824800  | -3.20793900 | 1.51086700  | H | 6.98144000  | -3.21532200 | 1.65879900  |
| H | 4.37366300  | -4.23514700 | -1.69728300 | H | 4.32338900  | -4.30354200 | -1.50974800 |
| C | 6.13182800  | -5.33357100 | 0.05286500  | C | 6.08169600  | -5.37065100 | 0.25943800  |
| H | 6.42771600  | -5.75958100 | -0.90890800 | H | 6.39126900  | -5.81703300 | -0.68880300 |
| H | 5.28803600  | -5.92368600 | 0.42153400  | H | 5.22867000  | -5.94904200 | 0.62522100  |
| H | 6.95990300  | -5.46226400 | 0.75114000  | H | 6.89764200  | -5.48979800 | 0.97350600  |
| C | 5.75112900  | -3.89104500 | -0.08557400 | C | 5.71162700  | -3.92911200 | 0.08605200  |
| C | 5.29236900  | 0.90321900  | -1.52896400 | C | 5.29796200  | 0.83745300  | -1.46692600 |
| C | 6.72960000  | 1.25439100  | -1.20284700 | C | 6.73329700  | 1.19020200  | -1.13469300 |
| H | 4.70957900  | 1.79340400  | -1.76096500 | H | 4.72050900  | 1.72463500  | -1.72270400 |
| H | 5.25626400  | 0.27407200  | -2.42336600 | H | 5.26658200  | 0.19013700  | -2.34841700 |
| H | 7.18400300  | 1.77422000  | -2.04892200 | H | 7.19700200  | 1.69136900  | -1.98696200 |
| H | 6.80156300  | 1.90164000  | -0.32519200 | H | 6.79931100  | 1.85503300  | -0.26977900 |
| H | 7.31652200  | 0.35585500  | -1.00557300 | H | 7.31565200  | 0.29411200  | -0.91408100 |
| N | -2.89302800 | -1.36202100 | 0.01383500  | N | -2.83128600 | -1.42207400 | -0.05712700 |
| N | -2.30920400 | -0.19775500 | -0.03559100 | N | -2.26781700 | -0.24805000 | -0.08399900 |
| C | -4.20446500 | -1.45858900 | -0.15004300 | C | -4.14820900 | -1.53274500 | -0.16248300 |
| C | -4.78479200 | -2.85139700 | -0.05511400 | C | -4.70363600 | -2.93751400 | -0.09931200 |
| C | -6.31315900 | -2.76528900 | 0.01399900  | C | -6.22685600 | -2.87859600 | 0.05618000  |
| C | -6.89675800 | -1.76194600 | -0.96213500 | C | -6.87651000 | -1.84587300 | -0.84479300 |
| C | -6.44727800 | -0.32441000 | -0.68101700 | C | -6.43108700 | -0.41402900 | -0.53014100 |
| C | -4.95803200 | -0.29865600 | -0.42298900 | C | -4.93060000 | -0.37541500 | -0.34955000 |
| N | -4.35153500 | 0.87597400  | -0.44225600 | N | -4.34227300 | 0.80891500  | -0.35142900 |
| C | -3.04272900 | 0.89079200  | -0.23974100 | C | -3.02639900 | 0.83589100  | -0.20706300 |
| H | -6.60968800 | -2.50415800 | 1.03534500  | H | -6.46998100 | -2.66326200 | 1.10199300  |

|                                                            |             |             |             |                                                            |             |             |             |
|------------------------------------------------------------|-------------|-------------|-------------|------------------------------------------------------------|-------------|-------------|-------------|
| H                                                          | -6.72438200 | -3.76096900 | -0.17448900 | H                                                          | -6.63452100 | -3.87219900 | -0.15038500 |
| H                                                          | -7.99005000 | -1.79453100 | -0.93663100 | H                                                          | -7.96616300 | -1.89637000 | -0.76061600 |
| H                                                          | -6.60786700 | -2.02979200 | -1.98414600 | H                                                          | -6.64155000 | -2.06818900 | -1.89124400 |
| C                                                          | -7.14820700 | 0.23904500  | 0.56270500  | C                                                          | -7.07177500 | 0.08856100  | 0.77088300  |
| H                                                          | -6.96045900 | -0.36504900 | 1.45239300  | H                                                          | -6.82978400 | -0.54853400 | 1.62368100  |
| H                                                          | -6.80194200 | 1.25391300  | 0.76745200  | H                                                          | -6.72688300 | 1.09880800  | 0.99921300  |
| H                                                          | -8.22725200 | 0.26993900  | 0.39189200  | H                                                          | -8.15866700 | 0.11124300  | 0.65838400  |
| C                                                          | -6.78211800 | 0.55996400  | -1.88204800 | C                                                          | -6.84154500 | 0.51215500  | -1.67478200 |
| H                                                          | -6.50712500 | 1.59878800  | -1.69891500 | H                                                          | -6.57167600 | 1.54703600  | -1.46385800 |
| H                                                          | -6.26046200 | 0.22165400  | -2.78068900 | H                                                          | -6.36390800 | 0.21857900  | -2.61280900 |
| H                                                          | -7.85649300 | 0.51448700  | -2.07682600 | H                                                          | -7.92403400 | 0.45760500  | -1.81452600 |
| C                                                          | -4.25643600 | -3.55126500 | 1.19915800  | C                                                          | -4.09819600 | -3.68417200 | 1.09135000  |
| H                                                          | -3.17503500 | -3.68147600 | 1.16388200  | H                                                          | -3.01867500 | -3.79475100 | 0.99171300  |
| H                                                          | -4.50330100 | -2.98554200 | 2.10119800  | H                                                          | -4.30109500 | -3.16264700 | 2.03005700  |
| H                                                          | -4.72033800 | -4.53778200 | 1.28041500  | H                                                          | -4.54344000 | -4.68061100 | 1.15345000  |
| C                                                          | -4.33178100 | -3.63898900 | -1.29181100 | C                                                          | -4.30922200 | -3.66220100 | -1.39313000 |
| H                                                          | -4.70321200 | -3.20005400 | -2.22094600 | H                                                          | -4.73862400 | -3.18967300 | -2.27979200 |
| H                                                          | -3.24205100 | -3.66860000 | -1.34308200 | H                                                          | -3.22376700 | -3.66938200 | -1.50609100 |
| H                                                          | -4.70124100 | -4.66537900 | -1.22601300 | H                                                          | -4.65845700 | -4.69700500 | -1.35346900 |
| N                                                          | 1.67080300  | 2.06213100  | -0.00965200 | N                                                          | 1.66562600  | 2.04039200  | -0.01489600 |
| N                                                          | -1.02281600 | 2.16452200  | -0.14620700 | N                                                          | -1.02166400 | 2.12954100  | -0.09626200 |
| C                                                          | 1.15300700  | 5.71366200  | -0.04040800 | C                                                          | 1.13485500  | 5.68823100  | -0.03314600 |
| C                                                          | -0.19590500 | 5.76601900  | -0.15067000 | C                                                          | -0.21546200 | 5.73444700  | -0.13222400 |
| C                                                          | -2.37924100 | 4.57817300  | -0.31507900 | C                                                          | -2.39591000 | 4.53170900  | -0.26902500 |
| C                                                          | 3.80635000  | 3.09348900  | 0.13259600  | C                                                          | 3.79761700  | 3.07422200  | 0.14087400  |
| C                                                          | 3.22540300  | 4.33757400  | 0.12581000  | C                                                          | 3.21513300  | 4.31785900  | 0.12463900  |
| C                                                          | 2.98353400  | 1.96309400  | 0.03722500  | C                                                          | 2.97710100  | 1.94202300  | 0.04593600  |
| C                                                          | -0.98018600 | 4.57495600  | -0.20135000 | C                                                          | -0.99568000 | 4.53983600  | -0.17049300 |
| C                                                          | 1.83297100  | 4.46064500  | 0.01202900  | C                                                          | 1.82203600  | 4.43856000  | 0.01525900  |
| C                                                          | -3.06087800 | 3.39100300  | -0.34543600 | C                                                          | -3.06886600 | 3.33888200  | -0.29393400 |
| C                                                          | -0.34711800 | 3.31911100  | -0.13166200 | C                                                          | -0.35425300 | 3.28893200  | -0.10179000 |
| C                                                          | 1.09052200  | 3.26457000  | -0.04041400 | C                                                          | 1.08359100  | 3.24103700  | -0.03440200 |
| H                                                          | 4.87802700  | 2.98419700  | 0.22963300  | H                                                          | 4.86891100  | 2.96702000  | 0.24446900  |
| H                                                          | -4.13748800 | 3.34802700  | -0.43381000 | H                                                          | -4.14557200 | 3.28781000  | -0.37691100 |
| H                                                          | 3.83638700  | 5.23006200  | 0.20769100  | H                                                          | 3.82532900  | 5.21129100  | 0.20187400  |
| H                                                          | -2.90956700 | 5.52240000  | -0.37546600 | H                                                          | -2.93453900 | 5.47143700  | -0.32616400 |
| H                                                          | 1.73833300  | 6.62527500  | 0.00470400  | H                                                          | 1.71569200  | 6.60297900  | 0.00613500  |
| H                                                          | -0.70614600 | 6.72180500  | -0.19757100 | H                                                          | -0.72983600 | 6.68808700  | -0.17705300 |
| C                                                          | -2.33829000 | 2.19127500  | -0.24656000 | C                                                          | -2.33778100 | 2.14442400  | -0.19709700 |
| <b>[Am(L3)<sub>2</sub>NO<sub>3</sub>]<sup>2+</sup>-isI</b> |             |             |             | <b>[Eu(L3)<sub>2</sub>NO<sub>3</sub>]<sup>2+</sup>-isI</b> |             |             |             |
| Am                                                         | 0.00030000  | -0.47952400 | -0.00003900 | Eu                                                         | -0.00016200 | -0.49218000 | 0.00015600  |
| N                                                          | -2.25509700 | -1.45951200 | 0.88536100  | N                                                          | 2.24933600  | -1.46536200 | -0.87753700 |
| N                                                          | -3.18757400 | -1.78564100 | 0.01575600  | N                                                          | 3.17550300  | -1.78640400 | 0.00090400  |

|   |             |             |             |   |             |             |             |
|---|-------------|-------------|-------------|---|-------------|-------------|-------------|
| C | -4.22189900 | -2.52223200 | 0.39795200  | C | 4.21381500  | -2.52356600 | -0.36835600 |
| C | -4.33522500 | -2.93356600 | 1.75281700  | C | 4.34037700  | -2.94032200 | -1.72019000 |
| N | -3.40393600 | -2.56100600 | 2.61694900  | N | 3.41644900  | -2.57259800 | -2.59405300 |
| C | -2.38439100 | -1.84919800 | 2.15099100  | C | 2.39120500  | -1.86064200 | -2.14037600 |
| C | -5.19896100 | -2.93048400 | -0.68387200 | C | 5.17836000  | -2.92944400 | 0.72547000  |
| C | -6.50119900 | -3.42977600 | -0.04330900 | C | 6.48658700  | -3.43422900 | 0.10179300  |
| H | -7.08990900 | -2.56863400 | 0.29477500  | H | 7.08205800  | -2.57564100 | -0.23083700 |
| H | -7.10358500 | -3.91758300 | -0.81592700 | H | 7.07810200  | -3.92240000 | 0.88255900  |
| C | -6.26635400 | -4.38451900 | 1.11486300  | C | 6.26313000  | -4.39061800 | -1.05738500 |
| H | -5.72063500 | -5.26815000 | 0.76589200  | H | 5.71180500  | -5.27264600 | -0.71313100 |
| H | -7.22195400 | -4.75757500 | 1.49559100  | H | 7.22238800  | -4.76613200 | -1.42634200 |
| C | -5.49631000 | -3.74515500 | 2.27867300  | C | 5.50756700  | -3.75240000 | -2.23129800 |
| C | -4.52460200 | -4.04448600 | -1.50321700 | C | 4.49096600  | -4.03864800 | 1.54067400  |
| H | -4.29788200 | -4.92803800 | -0.90156100 | H | 4.27659300  | -4.92664800 | 0.94098700  |
| H | -3.58365000 | -3.69073800 | -1.93191100 | H | 3.54154000  | -3.68326600 | 1.94894200  |
| H | -5.18368300 | -4.35395900 | -2.31925000 | H | 5.13537500  | -4.34156000 | 2.37074500  |
| C | -5.50376200 | -1.75018900 | -1.60779300 | C | 5.47482000  | -1.74643100 | 1.64842800  |
| H | -6.23022500 | -2.05909800 | -2.36445800 | H | 6.19124200  | -2.05389200 | 2.41518800  |
| H | -4.60435400 | -1.40072500 | -2.11673500 | H | 4.56997800  | -1.39299300 | 2.14469500  |
| H | -5.93505000 | -0.91025000 | -1.05407600 | H | 5.91468300  | -0.90962800 | 1.09670400  |
| C | -6.39856800 | -2.78099300 | 3.06956300  | C | 6.41924000  | -2.78864000 | -3.01188400 |
| H | -6.81490900 | -1.98702100 | 2.44386600  | H | 6.82739700  | -1.99375800 | -2.38195300 |
| H | -5.84204200 | -2.31248500 | 3.88490100  | H | 5.87263200  | -2.32134800 | -3.83460800 |
| H | -7.23283900 | -3.33747100 | 3.50461800  | H | 7.25913700  | -3.34517500 | -3.43591900 |
| C | -4.98999400 | -4.83859000 | 3.22313200  | C | 5.01320300  | -4.84660200 | -3.18104300 |
| H | -5.83597900 | -5.43799100 | 3.56934900  | H | 5.86353100  | -5.44570400 | -3.51699100 |
| H | -4.49208200 | -4.41689000 | 4.09728600  | H | 4.52526000  | -4.42562400 | -4.06113100 |
| H | -4.28862500 | -5.51035900 | 2.72034900  | H | 4.30640700  | -5.51856100 | -2.68615800 |
| N | -0.30169500 | -0.75535500 | 2.59690100  | N | 0.31303300  | -0.77597000 | -2.60279900 |
| C | -1.30309800 | -1.47345000 | 3.08669000  | C | 1.31724300  | -1.49148700 | -3.08673500 |
| C | -1.34964500 | -1.89820400 | 4.42387600  | C | 1.37214300  | -1.91740900 | -4.42363100 |
| H | -2.19821500 | -2.47917400 | 4.76105700  | H | 2.22331100  | -2.49724500 | -4.75649100 |
| C | -0.30462400 | -1.58292500 | 5.25601100  | C | 0.33142400  | -1.60240400 | -5.26201600 |
| H | -0.30294400 | -1.91307900 | 6.29020200  | H | 0.33644200  | -1.93157100 | -6.29651500 |
| C | 0.77394300  | -0.82991700 | 4.76134900  | C | -0.75055800 | -0.85020900 | -4.77290500 |
| C | 1.90042100  | -0.46649800 | 5.56281800  | C | -1.87340200 | -0.48221700 | -5.57784000 |
| H | 1.93203600  | -0.80123200 | 6.59487000  | H | -1.90179100 | -0.81345500 | -6.61114900 |
| C | 2.91058700  | 0.28142000  | 5.05269100  | C | -2.88409600 | 0.26729300  | -5.07013400 |
| H | 3.76151300  | 0.55293200  | 5.66910800  | H | -3.73086000 | 0.54301100  | -5.69043800 |
| C | 2.86675000  | 0.73935300  | 3.70024000  | C | -2.84674300 | 0.72103100  | -3.71572700 |
| C | 3.86608200  | 1.53852500  | 3.12442600  | C | -3.84493500 | 1.52176000  | -3.14020700 |
| H | 4.74601300  | 1.80175000  | 3.70327100  | H | -4.72117700 | 1.79233500  | -3.72128800 |
| C | 3.71959200  | 2.00642200  | 1.83928000  | C | -3.70228200 | 1.98227200  | -1.85145600 |
| H | 4.47680100  | 2.64342800  | 1.40478300  | H | -4.45914000 | 2.61997700  | -1.41758500 |

|   |             |             |             |   |             |             |             |
|---|-------------|-------------|-------------|---|-------------|-------------|-------------|
| C | 2.57508400  | 1.64398600  | 1.11083200  | C | -2.56266300 | 1.61008800  | -1.12000900 |
| N | 1.66898400  | 0.80767600  | 1.60389700  | N | -1.65786300 | 0.77377400  | -1.61401000 |
| C | 1.77754100  | 0.38640500  | 2.87325100  | C | -1.76295400 | 0.36059200  | -2.88519200 |
| C | 0.71470100  | -0.42704000 | 3.40955400  | C | -0.69833900 | -0.45068500 | -3.42003200 |
| C | 2.23442800  | 2.07657900  | -0.29375700 | C | -2.21530600 | 2.03136300  | 0.28636500  |
| N | 2.84073000  | 3.11730100  | -0.88968700 | N | -2.82281700 | 3.05860700  | 0.90191000  |
| N | 2.25519000  | -1.46054100 | -0.88496200 | N | -2.24984900 | -1.46487000 | 0.87757900  |
| N | 3.18763900  | -1.78639400 | -0.01525100 | N | -3.17582500 | -1.78604300 | -0.00101600 |
| C | 4.22227400  | -2.52262300 | -0.39732900 | C | -4.21440400 | -2.52284200 | 0.36821200  |
| C | 4.33581600  | -2.93401300 | -1.75215100 | C | -4.34142500 | -2.93910600 | 1.72015700  |
| N | 3.40448000  | -2.56179100 | -2.61638600 | N | -3.41766100 | -2.57127800 | 2.59414900  |
| C | 2.38473000  | -1.85018500 | -2.15058600 | C | -2.39215100 | -1.85967400 | 2.14052000  |
| C | 5.19943800  | -2.93038800 | 0.68459900  | C | -5.17877300 | -2.92885100 | -0.72572200 |
| C | 6.50182300  | -3.42945900 | 0.04416600  | C | -6.48728000 | -3.43310000 | -0.10219900 |
| H | 7.10428600  | -3.91703300 | 0.81687100  | H | -7.07873600 | -3.92136100 | -0.88295200 |
| H | 7.09035300  | -2.56823200 | -0.29400200 | H | -7.08260700 | -2.57425000 | 0.23002000  |
| C | 6.26724900  | -4.38440000 | -1.11390800 | C | -6.26434600 | -4.38918000 | 1.05733400  |
| H | 7.22294700  | -4.75732900 | -1.49451700 | H | -7.22378700 | -4.76434000 | 1.42617300  |
| H | 5.72166800  | -5.26808900 | -0.76486800 | H | -5.71315300 | -5.27145200 | 0.71349400  |
| C | 5.49716700  | -3.74532400 | -2.27784800 | C | -5.50891700 | -3.75077500 | 2.23123000  |
| C | 5.50388700  | -1.74978800 | 1.60825100  | C | -5.47471500 | -1.74606700 | -1.64913900 |
| H | 5.93491100  | -0.90984400 | 1.05433600  | H | -5.91447900 | -0.90896500 | -1.09779200 |
| H | 6.23045800  | -2.05830100 | 2.36497500  | H | -6.19104500 | -2.05359500 | -2.41595900 |
| H | 4.60437800  | -1.40048800 | 2.11712900  | H | -4.56967000 | -1.39303300 | -2.14532200 |
| C | 4.52542400  | -4.04439300 | 1.50422300  | C | -4.49147200 | -4.03849500 | -1.54040200 |
| H | 3.58433900  | -3.69084600 | 1.93279100  | H | -3.54184400 | -3.68350000 | -1.94853800 |
| H | 5.18457400  | -4.35341100 | 2.32037000  | H | -5.13574800 | -4.34148600 | -2.37054700 |
| H | 4.29905900  | -4.92819800 | 0.90280100  | H | -4.27750700 | -4.92637100 | -0.94038700 |
| C | 4.99124800  | -4.83894600 | -3.22229500 | C | -5.01500900 | -4.84480000 | 3.18141900  |
| H | 5.83744300  | -5.43807200 | -3.56848000 | H | -5.86554600 | -5.44361300 | 3.51735300  |
| H | 4.49322100  | -4.41743100 | -4.09647300 | H | -4.52717400 | -4.42366400 | 4.06149100  |
| H | 4.29009200  | -5.51094700 | -2.71952500 | H | -4.30825000 | -5.51706700 | 2.68689800  |
| C | 6.39924100  | -2.78097300 | -3.06871900 | C | -6.42056300 | -2.78658600 | 3.01131700  |
| H | 6.81524100  | -1.98678700 | -2.44306700 | H | -6.82841100 | -1.99180900 | 2.38105200  |
| H | 5.84268400  | -2.31274300 | -3.88419600 | H | -5.87404300 | -2.31915900 | 3.83402300  |
| H | 7.23375000  | -3.33724200 | -3.50358600 | H | -7.26067200 | -3.34281500 | 3.43533000  |
| N | 0.30206900  | -0.75643900 | -2.59676900 | N | -0.31388400 | -0.77529600 | 2.60311700  |
| C | 1.30344800  | -1.47467500 | -3.08638500 | C | -1.31835900 | -1.49044300 | 3.08703900  |
| C | 1.34994500  | -1.89986300 | -4.42343600 | C | -1.37364100 | -1.91598400 | 4.42404100  |
| H | 2.19852600  | -2.48090300 | -4.76046800 | H | -2.22501800 | -2.49551800 | 4.75689100  |
| C | 0.30485900  | -1.58490600 | -5.25560100 | C | -0.33300300 | -1.60101700 | 5.26254400  |
| H | 0.30310500  | -1.91540500 | -6.28968100 | H | -0.33831000 | -1.92989800 | 6.29713200  |
| C | -0.77371700 | -0.83179400 | -4.76110600 | C | 0.74928700  | -0.84926800 | 4.77343000  |
| C | -1.90027500 | -0.46876200 | -5.56263600 | C | 1.87210600  | -0.48141700 | 5.57846600  |

|   |             |             |             |   |             |             |             |
|---|-------------|-------------|-------------|---|-------------|-------------|-------------|
| H | -1.93192500 | -0.80387300 | -6.59456500 | H | 1.90020600  | -0.81238400 | 6.61186900  |
| C | -2.91047500 | 0.27923900  | -5.05270500 | C | 2.88313900  | 0.26761300  | 5.07072900  |
| H | -3.76148100 | 0.55043800  | -5.66914900 | H | 3.72988900  | 0.54321500  | 5.69110400  |
| C | -2.86657100 | 0.73766400  | -3.70042600 | C | 2.84618000  | 0.72098700  | 3.71618800  |
| C | -3.86594900 | 1.53691800  | -3.12482800 | C | 3.84474500  | 1.52121000  | 3.14061900  |
| H | -4.74595800 | 1.79982100  | -3.70370200 | H | 4.72098600  | 1.79163600  | 3.72177200  |
| C | -3.71945400 | 2.00531200  | -1.83986200 | C | 3.70247000  | 1.98142900  | 1.85171900  |
| H | -4.47682400 | 2.64230400  | -1.40563200 | H | 4.45963300  | 2.61874700  | 1.41781700  |
| C | -2.57483200 | 1.64333100  | -1.11135500 | C | 2.56284500  | 1.60945300  | 1.12017500  |
| C | -1.77726100 | 0.38515500  | -2.87337700 | C | 1.76241000  | 0.36069500  | 2.88556300  |
| C | -0.71440500 | -0.42842500 | -3.40946300 | C | 0.69743300  | -0.45008700 | 3.42044100  |
| C | -2.23404900 | 2.07648600  | 0.29305300  | C | 2.21581300  | 2.03052100  | -0.28635000 |
| N | -2.84092500 | 3.11686900  | 0.88901400  | N | 2.82391200  | 3.05725000  | -0.90216900 |
| O | -0.42619500 | -2.75748400 | -0.98275500 | O | 0.45968800  | -2.72082200 | 0.96677600  |
| N | -0.00138700 | -3.44228500 | 0.00031400  | N | 0.00036700  | -3.40595000 | 0.00073600  |
| O | 0.42502000  | -2.75763000 | 0.98282900  | O | -0.45946900 | -2.72135800 | -0.96544800 |
| O | -0.00283800 | -4.63917500 | 0.00086100  | O | 0.00082400  | -4.60274000 | 0.00084800  |
| N | -1.66865300 | 0.80697400  | -1.60421300 | N | 1.65768100  | 0.77357300  | 1.61425500  |
| O | -1.37391600 | 1.41893200  | 0.89773800  | O | 1.34217800  | 1.37382600  | -0.87321800 |
| C | -2.51757500 | 3.37856600  | 2.30207400  | C | 2.48253700  | 3.30816700  | -2.31306700 |
| C | -1.30653600 | 4.27845600  | 2.46639600  | C | 1.28153200  | 4.22294800  | -2.46841200 |
| H | -2.35497200 | 2.41573100  | 2.78560000  | H | 2.29909200  | 2.34257200  | -2.78335400 |
| H | -3.40264600 | 3.83921500  | 2.74482100  | H | 3.36709300  | 3.75175200  | -2.77394500 |
| H | -1.13172900 | 4.47741300  | 3.52645800  | H | 1.09188400  | 4.41152200  | -3.52781000 |
| H | -0.41355600 | 3.79852000  | 2.05879500  | H | 0.38880300  | 3.76066800  | -2.04037700 |
| H | -1.45479000 | 5.23952600  | 1.96761400  | H | 1.45115100  | 5.18785700  | -1.98412700 |
| O | 1.37491900  | 1.41831800  | -0.89856900 | O | -1.34200300 | 1.37434800  | 0.87336300  |
| C | 2.93333700  | 4.94651800  | 0.73549900  | C | -2.97059600 | 4.91575600  | -0.68712100 |
| C | 4.90280400  | 4.37639300  | -0.52662400 | C | -4.91706000 | 4.27369600  | 0.57650000  |
| C | 3.64470800  | 5.95157000  | 1.37832900  | C | -3.71030600 | 5.91593000  | -1.30505100 |
| H | 1.88525000  | 4.78178400  | 0.96769600  | H | -1.92078300 | 4.78008500  | -0.93000900 |
| C | 5.59950100  | 5.38771200  | 0.11677600  | C | -5.64246300 | 5.28016200  | -0.04246900 |
| H | 5.39947400  | 3.75237900  | -1.26374800 | H | -5.39291600 | 3.62361100  | 1.30476000  |
| H | 3.14147200  | 6.56875800  | 2.11674900  | H | -3.22731500 | 6.55935800  | -2.03452500 |
| H | 6.64260200  | 5.55597200  | -0.13464300 | H | -6.68756400 | 5.41822400  | 0.21882000  |
| C | 5.74249600  | 7.30358300  | 1.74603100  | C | -5.84235700 | 7.22382000  | -1.63238900 |
| H | 5.78299100  | 8.18445100  | 1.09707800  | H | -5.89542600 | 8.09214000  | -0.96761600 |
| H | 6.77417300  | 7.01600700  | 1.96077000  | H | -6.86960300 | 6.91740000  | -1.84213400 |
| H | 5.27374400  | 7.60994700  | 2.68278000  | H | -5.38982900 | 7.55675000  | -2.56805100 |
| C | 4.98634000  | 6.19320300  | 1.08180700  | C | -5.05537800 | 6.11907100  | -0.99513100 |
| C | 2.51750800  | 3.37867600  | -2.30282900 | C | -2.48122800 | 3.30976600  | 2.31271100  |
| C | 1.30603000  | 4.27793100  | -2.46742200 | C | -1.27971000 | 4.22393300  | 2.46770600  |
| H | 2.35545800  | 2.41571200  | -2.78628300 | H | -2.29829100 | 2.34421400  | 2.78328100  |
| H | 3.40241000  | 3.83972300  | -2.74549500 | H | -3.36551200 | 3.75397900  | 2.77350800  |

|                                                            |             |             |             |                                                            |             |             |             |
|------------------------------------------------------------|-------------|-------------|-------------|------------------------------------------------------------|-------------|-------------|-------------|
| H                                                          | 1.13124900  | 4.47666400  | -3.52752900 | H                                                          | -1.08989700 | 4.41272900  | 3.52703500  |
| H                                                          | 0.41324000  | 3.79758900  | -2.05987100 | H                                                          | -0.38726000 | 3.76103300  | 2.03976000  |
| H                                                          | 1.45372200  | 5.23913500  | -1.96873100 | H                                                          | -1.44882900 | 5.18878600  | 1.98313300  |
| C                                                          | 3.56630600  | 4.14573300  | -0.20857200 | C                                                          | -3.57784400 | 4.08191400  | 0.24510200  |
| C                                                          | -3.56703600 | 4.14490100  | 0.20788500  | C                                                          | 3.57951400  | 4.08033200  | -0.24566800 |
| C                                                          | -4.90360000 | 4.37491400  | 0.52596100  | C                                                          | 4.91887600  | 4.27112000  | -0.57695500 |
| C                                                          | -5.60090100 | 5.38572400  | -0.11766300 | C                                                          | 5.64485900  | 5.27737200  | 0.04173400  |
| C                                                          | -3.64644700 | 5.95034900  | -1.37940500 | C                                                          | 3.71292300  | 5.91486100  | 1.30379100  |
| C                                                          | -2.93452600 | 4.94584100  | -0.73641500 | C                                                          | 2.97266600  | 4.91493700  | 0.68616400  |
| H                                                          | -5.39990900 | 3.75078200  | 1.26322700  | H                                                          | 5.39442100  | 3.62043100  | -1.30487900 |
| H                                                          | -6.64409100 | 5.55343400  | 0.13373500  | H                                                          | 6.69008700  | 5.41463400  | -0.21945000 |
| H                                                          | -3.14359900 | 6.56763700  | -2.11801300 | H                                                          | 3.23025900  | 6.55887300  | 2.03296900  |
| H                                                          | -1.88637300 | 4.78157600  | -0.96865100 | H                                                          | 1.92274000  | 4.78000600  | 0.92898300  |
| C                                                          | -5.74469200 | 7.30144400  | -1.74717000 | C                                                          | 5.84557600  | 7.22171300  | 1.63081800  |
| H                                                          | -5.28100100 | 7.60177600  | -2.68840500 | H                                                          | 5.39633400  | 7.55117700  | 2.56930300  |
| H                                                          | -5.77734200 | 8.18546100  | -1.10204100 | H                                                          | 5.89378600  | 8.09195900  | 0.96818000  |
| H                                                          | -6.77885000 | 7.01690400  | -1.95367700 | H                                                          | 6.87437000  | 6.91701400  | 1.83529300  |
| C                                                          | -4.98823400 | 6.19132200  | -1.08286100 | C                                                          | 5.05819100  | 6.11702500  | 0.99396000  |
| <b>[Am(L3)<sub>2</sub>NO<sub>3</sub>]<sup>2+</sup>-is2</b> |             |             |             | <b>[Eu(L3)<sub>2</sub>NO<sub>3</sub>]<sup>2+</sup>-is2</b> |             |             |             |
| Am                                                         | -0.44995500 | 0.09423200  | -0.18044800 | Eu                                                         | -0.47963500 | 0.00023500  | -0.18338400 |
| N                                                          | -4.44742400 | 1.79622600  | -1.19752700 | N                                                          | -4.67104200 | 1.01709200  | -1.22541300 |
| C                                                          | -3.37697700 | 1.54586700  | -0.43852400 | C                                                          | -3.58492000 | 0.93138800  | -0.45363600 |
| N                                                          | -2.39826700 | 0.58594000  | 1.47521800  | N                                                          | -2.48029100 | 0.15776200  | 1.46506900  |
| C                                                          | -3.50312200 | 1.15410400  | 1.01336500  | C                                                          | -3.66228800 | 0.53060600  | 0.99945800  |
| C                                                          | -4.60367600 | 1.41422700  | 1.84569500  | C                                                          | -4.79503400 | 0.59604300  | 1.82764700  |
| H                                                          | -5.47891500 | 1.92125100  | 1.46389400  | H                                                          | -5.74373400 | 0.94571900  | 1.44463200  |
| C                                                          | -4.55673000 | 1.00317900  | 3.15690300  | C                                                          | -4.68144100 | 0.19703900  | 3.13922300  |
| H                                                          | -5.39849200 | 1.18736000  | 3.81717800  | H                                                          | -5.54446600 | 0.23342000  | 3.79672300  |
| C                                                          | -3.42146600 | 0.33621700  | 3.64378300  | C                                                          | -3.44983400 | -0.26559100 | 3.62980900  |
| C                                                          | -3.31213700 | -0.14906600 | 4.98316300  | C                                                          | -3.25700300 | -0.72482600 | 4.96915900  |
| H                                                          | -4.15711400 | -0.02693000 | 5.65322300  | H                                                          | -4.10921600 | -0.75042800 | 5.64072100  |
| C                                                          | -2.17396000 | -0.74862200 | 5.41262400  | C                                                          | -2.03138400 | -1.11806900 | 5.39777000  |
| H                                                          | -2.09507600 | -1.11378300 | 6.43167200  | H                                                          | -1.89037800 | -1.46276400 | 6.41727600  |
| C                                                          | -1.04803400 | -0.89599400 | 4.54473200  | C                                                          | -0.89641300 | -1.07028200 | 4.52969600  |
| C                                                          | 0.16964700  | -1.45609800 | 4.96633800  | C                                                          | 0.40114700  | -1.40890800 | 4.94937200  |
| H                                                          | 0.26868800  | -1.82868200 | 5.98130600  | H                                                          | 0.56610900  | -1.75674900 | 5.96456500  |
| C                                                          | 1.23384900  | -1.49807900 | 4.10016800  | C                                                          | 1.45469900  | -1.26565500 | 4.08042300  |
| H                                                          | 2.20001400  | -1.88591300 | 4.39536200  | H                                                          | 2.47458500  | -1.47768900 | 4.37377300  |
| C                                                          | 1.06589200  | -1.00373700 | 2.79724900  | C                                                          | 1.19973900  | -0.81147700 | 2.77706500  |
| N                                                          | -0.09068400 | -0.53004800 | 2.35146200  | N                                                          | -0.02222900 | -0.54849800 | 2.33294700  |
| C                                                          | -1.12546700 | -0.44698500 | 3.20717700  | C                                                          | -1.05250600 | -0.64421000 | 3.19184800  |
| C                                                          | -2.34424200 | 0.16993500  | 2.74692900  | C                                                          | -2.35940200 | -0.24517100 | 2.73417100  |
| N                                                          | 2.04225000  | -0.31911800 | 0.71114000  | N                                                          | 2.02657600  | 0.03484300  | 0.68808900  |

|   |             |             |             |   |            |             |             |
|---|-------------|-------------|-------------|---|------------|-------------|-------------|
| C | 2.22720300  | -0.92007700 | 1.88530800  | C | 2.32347000 | -0.52416200 | 1.85991400  |
| N | 3.39019200  | -1.40117000 | 2.31193000  | N | 3.55609600 | -0.78971400 | 2.27869600  |
| C | 4.44583000  | -1.23816600 | 1.53114900  | C | 4.56057900 | -0.44038000 | 1.49113500  |
| C | 4.28626600  | -0.55107900 | 0.29895700  | C | 4.27275900 | 0.20747300  | 0.26125300  |
| N | 3.08455500  | -0.12942200 | -0.07250200 | N | 3.01267300 | 0.40798600  | -0.10206400 |
| C | 5.43939300  | -0.22460700 | -0.62867800 | C | 5.34274400 | 0.73442900  | -0.67362700 |
| C | 5.75697800  | -1.83781100 | 1.98441200  | C | 5.96055000 | -0.79629700 | 1.93520500  |
| C | 6.63835100  | -1.12519400 | -0.29854400 | C | 6.68473000 | 0.06059800  | -0.35361800 |
| H | 6.46104500  | -2.12388000 | -0.71435300 | H | 6.68382100 | -0.95385200 | -0.76907300 |
| H | 7.51819300  | -0.73816200 | -0.82182500 | H | 7.47823200 | 0.59711300  | -0.88300400 |
| C | 6.91958000  | -1.22644800 | 1.19078600  | C | 6.99048900 | 0.01117500  | 1.13357000  |
| H | 7.81454200  | -1.83162000 | 1.36419500  | H | 7.97981700 | -0.42569400 | 1.29982000  |
| H | 7.14952200  | -0.23506600 | 1.59763500  | H | 7.04410200 | 1.02779900  | 1.53954200  |
| C | 5.03641300  | -0.43315900 | -2.08957600 | C | 4.97216600 | 0.45901100  | -2.13203700 |
| H | 4.71686300  | -1.46345600 | -2.27253300 | H | 4.84143800 | -0.61167000 | -2.31541700 |
| H | 5.89449000  | -0.23108000 | -2.73642100 | H | 5.77466900 | 0.81286300  | -2.78495200 |
| H | 4.22334500  | 0.23310600  | -2.38092700 | H | 4.05013700 | 0.96855800  | -2.41500600 |
| C | 5.79437600  | 1.25657500  | -0.41761400 | C | 5.43040300 | 2.25494600  | -0.46188200 |
| H | 4.93447500  | 1.89117200  | -0.65007400 | H | 4.46938000 | 2.72646400  | -0.68615500 |
| H | 6.61574600  | 1.54035600  | -1.08137200 | H | 6.18266400 | 2.68100500  | -1.13143600 |
| H | 6.10383800  | 1.47133200  | 0.60861700  | H | 5.70506700 | 2.52051400  | 0.56237300  |
| C | 5.66213400  | -3.35479200 | 1.73912800  | C | 6.13546800 | -2.30625700 | 1.69036800  |
| H | 6.57974900  | -3.83835400 | 2.08423500  | H | 7.12630100 | -2.61875400 | 2.03030000  |
| H | 5.52933300  | -3.60221300 | 0.68255500  | H | 6.04294100 | -2.57437000 | 0.63452500  |
| H | 4.82418800  | -3.78280200 | 2.29513500  | H | 5.38994600 | -2.87577900 | 2.25104200  |
| C | 5.96801600  | -1.59080600 | 3.47988900  | C | 6.13421900 | -0.51415700 | 3.42925100  |
| H | 5.19166500  | -2.06630900 | 4.08062400  | H | 5.45896100 | -1.11974400 | 4.03504100  |
| H | 5.97584800  | -0.52222400 | 3.71340800  | H | 5.95304200 | 0.53896400  | 3.66286000  |
| H | 6.93337900  | -2.00417500 | 3.78298900  | H | 7.15980600 | -0.74858800 | 3.72569300  |
| N | 0.26948100  | -2.41194000 | -0.50985000 | N | 0.69065900 | -2.32382200 | -0.51638300 |
| N | -0.07809600 | -3.30248800 | 0.39447600  | N | 0.53341400 | -3.25505000 | 0.40002200  |
| C | 0.03069400  | -4.59693500 | 0.12749100  | C | 0.86550900 | -4.51128400 | 0.13528800  |
| C | 0.53770800  | -5.01920700 | -1.13040500 | C | 1.40820500 | -4.84681200 | -1.13341200 |
| N | 0.91895600  | -4.10464600 | -2.00929600 | N | 1.59690700 | -3.88610200 | -2.02527400 |
| C | 0.76098100  | -2.82965800 | -1.67501700 | C | 1.22039900 | -2.65732200 | -1.69202900 |
| C | -0.45774300 | -5.55032800 | 1.19712100  | C | 0.57924400 | -5.52782900 | 1.21983700  |
| C | 0.06768700  | -6.96316200 | 0.90796400  | C | 1.33961800 | -6.82776400 | 0.92371000  |
| H | -0.46416500 | -7.67026400 | 1.55196700  | H | 0.95489100 | -7.61301600 | 1.58174600  |
| H | 1.12142800  | -7.02356400 | 1.20520800  | H | 2.39357300 | -6.69926100 | 1.19755000  |
| C | -0.08458300 | -7.36722000 | -0.54866200 | C | 1.22999400 | -7.26321300 | -0.52778100 |
| H | 0.24260000  | -8.40181700 | -0.68944200 | H | 1.73309800 | -8.22406600 | -0.67237400 |
| H | -1.14260700 | -7.34952900 | -0.83293400 | H | 0.17972200 | -7.43618000 | -0.78771800 |
| C | 0.70923400  | -6.47160600 | -1.50980300 | C | 1.82982600 | -6.24781100 | -1.51025600 |
| C | 0.02277600  | -5.09854500 | 2.57783900  | C | 1.00280700 | -4.98728400 | 2.58707500  |

|   |             |             |             |   |             |             |             |
|---|-------------|-------------|-------------|---|-------------|-------------|-------------|
| H | 1.11532200  | -5.05075600 | 2.62523800  | H | 2.06964300  | -4.74299200 | 2.60764800  |
| H | -0.31178100 | -5.81580500 | 3.33222300  | H | 0.82073200  | -5.74756600 | 3.35149300  |
| H | -0.37538300 | -4.11650900 | 2.83776000  | H | 0.44046000  | -4.09118400 | 2.85374600  |
| C | -1.99534400 | -5.51744600 | 1.16788800  | C | -0.94038900 | -5.76706500 | 1.22613800  |
| H | -2.36130400 | -4.50275500 | 1.34352200  | H | -1.47585200 | -4.82971800 | 1.39661300  |
| H | -2.39390700 | -6.16993200 | 1.94977700  | H | -1.20155900 | -6.46661100 | 2.02510900  |
| H | -2.40291200 | -5.85260400 | 0.21093000  | H | -1.30173300 | -6.18466000 | 0.28310000  |
| C | 0.22615300  | -6.69988700 | -2.94476100 | C | 1.36655600  | -6.57156300 | -2.93322400 |
| H | 0.32551700  | -7.75905600 | -3.19595500 | H | 1.65069900  | -7.59733200 | -3.18194100 |
| H | 0.81107400  | -6.12387400 | -3.66311300 | H | 1.82263500  | -5.90508800 | -3.66652800 |
| H | -0.82616000 | -6.42645300 | -3.06251000 | H | 0.27992500  | -6.49390900 | -3.02919200 |
| C | 2.21440700  | -6.78419900 | -1.43417000 | C | 3.36796800  | -6.28359300 | -1.46588200 |
| H | 2.61801800  | -6.66363300 | -0.42523000 | H | 3.76385100  | -6.08223000 | -0.46683000 |
| H | 2.77811300  | -6.13161500 | -2.10531900 | H | 3.79077500  | -5.54659700 | -2.15302400 |
| H | 2.38740800  | -7.81840400 | -1.74301200 | H | 3.71838900  | -7.27264000 | -1.77230400 |
| N | 1.00380100  | -0.52857900 | -2.26917400 | N | 1.03500000  | -0.35737600 | -2.29442900 |
| C | 1.14156900  | -1.78947700 | -2.65358000 | C | 1.38941800  | -1.57302300 | -2.68175000 |
| C | 1.60481300  | -2.14696600 | -3.92936700 | C | 1.88961200  | -1.84508100 | -3.96503500 |
| H | 1.69666500  | -3.19576300 | -4.18062600 | H | 2.16205000  | -2.86134100 | -4.21937700 |
| C | 1.90251000  | -1.15272900 | -4.82867700 | C | 1.99575500  | -0.81420600 | -4.86671900 |
| H | 2.24246700  | -1.39806000 | -5.83009600 | H | 2.36035100  | -0.99655000 | -5.87292400 |
| C | 1.76190200  | 0.19331600  | -4.44862200 | C | 1.62800100  | 0.48683300  | -4.48108600 |
| C | 2.04835300  | 1.28754900  | -5.32323600 | C | 1.71043600  | 1.61829100  | -5.35179700 |
| H | 2.37205100  | 1.07089800  | -6.33637600 | H | 2.05479500  | 1.46577400  | -6.36983400 |
| C | 1.92064100  | 2.57197700  | -4.90427100 | C | 1.36912500  | 2.86017500  | -4.92304400 |
| H | 2.13894700  | 3.39493600  | -5.57723800 | H | 1.43582600  | 3.71108800  | -5.59337700 |
| C | 1.51034500  | 2.86622900  | -3.56744800 | C | 0.92955200  | 3.07450500  | -3.58002400 |
| C | 1.38383500  | 4.16990400  | -3.06253900 | C | 0.58731100  | 4.33380500  | -3.06271300 |
| H | 1.56162300  | 5.02024000  | -3.71366900 | H | 0.61075800  | 5.20687500  | -3.70760300 |
| C | 1.06002100  | 4.36995500  | -1.74003600 | C | 0.24655000  | 4.46603800  | -1.73553200 |
| H | 0.98845100  | 5.37380900  | -1.34611500 | H | 0.00779700  | 5.44007500  | -1.33272800 |
| C | 0.82670000  | 3.25355700  | -0.92000000 | C | 0.21565400  | 3.31978900  | -0.92375600 |
| C | 1.20551600  | 1.81094300  | -2.68140800 | C | 0.81997800  | 1.97766500  | -2.69910600 |
| C | 1.31588800  | 0.44804000  | -3.13427300 | C | 1.15973900  | 0.65690800  | -3.16111700 |
| C | 0.48643300  | 3.26846100  | 0.55066800  | C | -0.10978700 | 3.25648000  | 0.54884500  |
| N | 0.67989600  | 4.35358400  | 1.31750400  | N | -0.11477600 | 4.34800200  | 1.32979100  |
| O | -1.63671400 | -0.91819700 | -2.19691500 | O | -1.48712500 | -1.19541300 | -2.13691400 |
| N | -2.56241900 | -1.50450300 | -1.56075300 | N | -2.25998100 | -1.94931400 | -1.47370900 |
| O | -2.50811700 | -1.38685600 | -0.29807500 | O | -2.15650500 | -1.85124800 | -0.21424000 |
| O | -3.43617600 | -2.11843800 | -2.11095200 | O | -3.04324200 | -2.69342000 | -1.99939500 |
| N | 0.84181200  | 2.01894800  | -1.40720700 | N | 0.44035900  | 2.11051700  | -1.42066700 |
| O | 0.00373600  | 2.23228800  | 1.03202200  | O | -0.38803700 | 2.14229000  | 1.01750800  |
| C | 0.21315900  | 4.29940100  | 2.71375200  | C | -0.54916200 | 4.19048000  | 2.72861100  |
| C | 1.26093000  | 3.73867100  | 3.65767800  | C | 0.59513400  | 3.82860500  | 3.65749400  |



|                                                            |              |             |             |                                                            |              |             |             |
|------------------------------------------------------------|--------------|-------------|-------------|------------------------------------------------------------|--------------|-------------|-------------|
| H                                                          | -0.69346100  | 3.69526400  | 2.73200300  | H                                                          | -1.32407900  | 3.42464800  | 2.74577900  |
| H                                                          | -0.05117500  | 5.32097600  | 2.99375700  | H                                                          | -1.00006400  | 5.14004300  | 3.02352200  |
| H                                                          | 0.88252700   | 3.75025500  | 4.68265000  | H                                                          | 0.23158200   | 3.75712500  | 4.68540400  |
| H                                                          | 1.50574900   | 2.70645300  | 3.39737300  | H                                                          | 1.02868100   | 2.86445000  | 3.38258100  |
| H                                                          | 2.17622800   | 4.33508900  | 3.63630700  | H                                                          | 1.38057900   | 4.58790200  | 3.63657800  |
| O                                                          | -2.22005500  | 1.65368400  | -0.89136200 | O                                                          | -2.45075100  | 1.20161200  | -0.89788600 |
| C                                                          | -5.77819800  | 1.37505100  | -0.87295300 | C                                                          | -5.93126400  | 0.41370000  | -0.90656300 |
| C                                                          | -6.06267500  | 0.02295500  | -0.71413200 | C                                                          | -6.02340400  | -0.96518500 | -0.75046100 |
| C                                                          | -6.79426500  | 2.32136700  | -0.76350700 | C                                                          | -7.07013000  | 1.20798200  | -0.80021100 |
| C                                                          | -7.36084900  | -0.37097800 | -0.41584200 | C                                                          | -7.25429900  | -1.53814700 | -0.45742900 |
| H                                                          | -5.27931100  | -0.71953800 | -0.83450700 | H                                                          | -5.14275300  | -1.58996100 | -0.86797100 |
| C                                                          | -8.08553600  | 1.91079900  | -0.47007600 | C                                                          | -8.29203900  | 0.61960100  | -0.51188300 |
| H                                                          | -6.57101200  | 3.37674700  | -0.88986600 | H                                                          | -6.99634800  | 2.28436300  | -0.92492500 |
| H                                                          | -7.57531100  | -1.42873000 | -0.29545700 | H                                                          | -7.31858400  | -2.61565200 | -0.33855600 |
| H                                                          | -8.87168400  | 2.65486300  | -0.38090900 | H                                                          | -9.17523500  | 1.24567100  | -0.42473500 |
| C                                                          | -9.80019900  | 0.12275300  | -0.01166500 | C                                                          | -9.74006900  | -1.39208300 | -0.06101000 |
| H                                                          | -10.36256600 | 0.02005200  | -0.94556600 | H                                                          | -10.28121400 | -1.56754300 | -0.99660300 |
| H                                                          | -10.33334600 | 0.84824500  | 0.60665700  | H                                                          | -10.37015100 | -0.75117300 | 0.55958500  |
| H                                                          | -9.83196200  | -0.84398400 | 0.49424000  | H                                                          | -9.63731400  | -2.35627900 | 0.44022400  |
| C                                                          | -8.39337900  | 0.55863400  | -0.28956300 | C                                                          | -8.40751300  | -0.76267200 | -0.33386200 |
| C                                                          | -4.23753500  | 2.30162000  | -2.56745200 | C                                                          | -4.52222600  | 1.53000800  | -2.60060100 |
| C                                                          | -4.20535200  | 1.19410100  | -3.60409900 | C                                                          | -4.33096600  | 0.42401200  | -3.62173000 |
| H                                                          | -3.30591000  | 2.86627500  | -2.56421400 | H                                                          | -3.67637500  | 2.21641500  | -2.59912700 |
| H                                                          | -5.05686200  | 2.99573400  | -2.76749500 | H                                                          | -5.42734900  | 2.10313500  | -2.81411700 |
| H                                                          | -4.10449200  | 1.63198500  | -4.60032000 | H                                                          | -4.27457900  | 0.85967800  | -4.62242000 |
| H                                                          | -3.36253000  | 0.51988600  | -3.44152000 | H                                                          | -3.40977300  | -0.13222400 | -3.43903500 |
| H                                                          | -5.12767700  | 0.60903100  | -3.59208500 | H                                                          | -5.16905900  | -0.27643800 | -3.61320300 |
| C                                                          | 0.99792400   | 6.73883200  | 0.89625100  | C                                                          | -0.26294900  | 6.75311300  | 0.92671800  |
| C                                                          | 1.82586100   | 7.80846100  | 0.59172500  | C                                                          | 0.34299800   | 7.96411900  | 0.62884400  |
| C                                                          | 3.70873300   | 6.33482600  | 0.46959300  | C                                                          | 2.47367600   | 6.88075900  | 0.49213000  |
| C                                                          | 2.89152600   | 5.25564000  | 0.78070300  | C                                                          | 1.88007800   | 5.66237600  | 0.79621400  |
| C                                                          | 1.52976800   | 5.45425500  | 0.97986600  | C                                                          | 0.50625400   | 5.59428500  | 0.99938400  |
| H                                                          | -0.06547000  | 6.89559800  | 1.05107000  | H                                                          | -1.33608200  | 6.70129700  | 1.08499700  |
| H                                                          | 1.40061600   | 8.80546000  | 0.52318100  | H                                                          | -0.26608100  | 8.86131100  | 0.56872600  |
| H                                                          | 4.77063100   | 6.16892300  | 0.31354800  | H                                                          | 3.54711600   | 6.92317700  | 0.33277300  |
| H                                                          | 3.30940700   | 4.25708700  | 0.86993000  | H                                                          | 2.48228800   | 4.76206800  | 0.87633700  |
| C                                                          | 4.08445600   | 8.79800400  | 0.07665300  | C                                                          | 2.36745500   | 9.37295900  | 0.11697200  |
| H                                                          | 5.00946100   | 8.49079900  | -0.41448800 | H                                                          | 3.33662100   | 9.25261700  | -0.37027300 |
| H                                                          | 4.36148100   | 9.31373200  | 1.00188500  | H                                                          | 2.53489800   | 9.92984500  | 1.04464400  |
| H                                                          | 3.58761700   | 9.53102200  | -0.56274600 | H                                                          | 1.74060400   | 9.99758100  | -0.52332100 |
| C                                                          | 3.19505800   | 7.62832100  | 0.37120800  | C                                                          | 1.72062900   | 8.05202500  | 0.40454000  |
| <b>[Am(L3)<sub>2</sub>NO<sub>3</sub>]<sup>2+</sup>-is3</b> |              |             |             | <b>[Eu(L3)<sub>2</sub>NO<sub>3</sub>]<sup>2+</sup>-is3</b> |              |             |             |
| Am                                                         | -0.00000100  | 0.25383900  | -0.00001300 | Eu                                                         | -0.00005300  | 0.25677300  | 0.00001000  |

|   |             |             |             |   |             |             |             |
|---|-------------|-------------|-------------|---|-------------|-------------|-------------|
| C | -2.82237100 | 1.68738800  | 0.86835400  | C | -2.79689700 | 1.68721400  | 0.87030600  |
| N | -2.30637200 | 0.59888700  | -1.15081200 | N | -2.29965000 | 0.61074900  | -1.15251100 |
| C | -3.23201300 | 1.32405900  | -0.53808400 | C | -3.22128000 | 1.33374500  | -0.53466600 |
| C | -4.45664700 | 1.62825200  | -1.15421500 | C | -4.44437900 | 1.64828600  | -1.15014500 |
| H | -5.22241600 | 2.17738700  | -0.62437400 | H | -5.20991900 | 2.19498100  | -0.61733300 |
| C | -4.66381200 | 1.23009300  | -2.45454700 | C | -4.65032400 | 1.26323000  | -2.45528300 |
| H | -5.59869200 | 1.46490700  | -2.95397300 | H | -5.58394100 | 1.50558600  | -2.95349100 |
| C | -3.66371300 | 0.52488600  | -3.14194800 | C | -3.64984000 | 0.56378300  | -3.14869300 |
| C | -3.79170600 | 0.09970300  | -4.50013500 | C | -3.76891800 | 0.15136200  | -4.51198900 |
| H | -4.68979700 | 0.36579200  | -5.04831600 | H | -4.66348100 | 0.42191900  | -5.06379900 |
| C | -2.81260400 | -0.62721800 | -5.09475000 | C | -2.78589900 | -0.57012500 | -5.10805000 |
| H | -2.91629600 | -0.94962500 | -6.12594500 | H | -2.88484400 | -0.88280100 | -6.14272700 |
| C | -1.63390700 | -1.00034000 | -4.37688900 | C | -1.60988300 | -0.94985400 | -4.38839200 |
| C | -0.62071700 | -1.80106100 | -4.93167700 | C | -0.59177900 | -1.74587800 | -4.94129400 |
| H | -0.70090100 | -2.13562200 | -5.96145300 | H | -0.66317400 | -2.07306100 | -5.97409000 |
| C | 0.44712800  | -2.18008300 | -4.15608000 | C | 0.46962600  | -2.13159700 | -4.15900700 |
| H | 1.22884800  | -2.82754400 | -4.53137700 | H | 1.25352700  | -2.77793300 | -4.53197600 |
| C | 0.51585200  | -1.72684500 | -2.82899000 | C | 0.52704600  | -1.68687900 | -2.82866500 |
| N | -0.39088600 | -0.91436800 | -2.30203700 | N | -0.38221900 | -0.87717500 | -2.30381900 |
| C | -1.46236600 | -0.57649900 | -3.04126300 | C | -1.44748000 | -0.53664600 | -3.04863100 |
| C | -2.49412600 | 0.21124900  | -2.41831700 | C | -2.48401200 | 0.24168600  | -2.42387800 |
| N | 1.53225900  | -1.84584400 | -0.65445800 | N | 1.50600200  | -1.81796400 | -0.64015600 |
| C | 1.58119500  | -2.22172200 | -1.93082400 | C | 1.57654500  | -2.18909800 | -1.91742100 |
| N | 2.48592400  | -3.05007200 | -2.44027400 | N | 2.48523400  | -3.02108400 | -2.41231000 |
| C | 3.36899100  | -3.58036400 | -1.61047100 | C | 3.34992000  | -3.55940300 | -1.56810000 |
| C | 3.29132600  | -3.25519100 | -0.23025400 | C | 3.24984300  | -3.23717300 | -0.18868200 |
| N | 2.39074900  | -2.37698800 | 0.19263700  | N | 2.34571600  | -2.35599800 | 0.22051100  |
| C | 4.17076600  | -3.90023600 | 0.82150100  | C | 4.10834900  | -3.88825600 | 0.87657000  |
| C | 4.44354500  | -4.46590600 | -2.19862800 | C | 4.42756400  | -4.45176200 | -2.13959500 |
| C | 5.42188700  | -4.48988800 | 0.15494700  | C | 5.36665400  | -4.48446800 | 0.22957900  |
| H | 6.11574200  | -3.67618000 | -0.08680500 | H | 6.06900900  | -3.67451600 | 0.00008800  |
| H | 5.94166400  | -5.11659100 | 0.88632800  | H | 5.87086200  | -5.11492900 | 0.96855400  |
| C | 5.11121600  | -5.29621600 | -1.09421300 | C | 5.07166800  | -5.28752100 | -1.02542100 |
| H | 6.02952100  | -5.73434900 | -1.49676700 | H | 5.99369400  | -5.73099500 | -1.41330700 |
| H | 4.46508100  | -6.14439200 | -0.84140100 | H | 4.41609300  | -6.13187700 | -0.78435300 |
| C | 4.59458000  | -2.88394100 | 1.88179200  | C | 4.52127700  | -2.87502800 | 1.94405300  |
| H | 5.12475700  | -2.03747800 | 1.43497100  | H | 5.06472800  | -2.03220400 | 1.50646400  |
| H | 5.27047100  | -3.36352400 | 2.59506500  | H | 5.18182300  | -3.35930100 | 2.66841200  |
| H | 3.73651000  | -2.49728000 | 2.43282500  | H | 3.65682400  | -2.48261700 | 2.48079400  |
| C | 3.34008700  | -5.00447800 | 1.49701700  | C | 3.26075600  | -4.98813100 | 1.53793100  |
| H | 2.45045000  | -4.57941000 | 1.96965800  | H | 2.36608100  | -4.55824300 | 1.99647000  |
| H | 3.93527900  | -5.49536600 | 2.27201900  | H | 3.84054300  | -5.48270100 | 2.32218200  |
| H | 3.00930000  | -5.77230900 | 0.79311300  | H | 2.93707400  | -5.75380800 | 0.82838500  |
| C | 5.46480700  | -3.53389900 | -2.87616700 | C | 5.46579600  | -3.52624400 | -2.80016800 |

|   |             |             |             |   |             |             |             |
|---|-------------|-------------|-------------|---|-------------|-------------|-------------|
| H | 6.24522300  | -4.13338500 | -3.35213100 | H | 6.24914300  | -4.13092200 | -3.26456200 |
| H | 5.94772400  | -2.85510600 | -2.16826000 | H | 5.94257200  | -2.85164500 | -2.08414900 |
| H | 4.98318100  | -2.92974400 | -3.64894500 | H | 5.00053000  | -2.91804600 | -3.57974300 |
| C | 3.84789500  | -5.39885100 | -3.25534000 | C | 3.84207500  | -5.37956000 | -3.20657900 |
| H | 3.42290400  | -4.84207100 | -4.09144700 | H | 3.43401900  | -4.81900000 | -4.04855400 |
| H | 3.06476300  | -6.03541100 | -2.83347300 | H | 3.04817600  | -6.01123000 | -2.79767600 |
| H | 4.63262700  | -6.05188200 | -3.64577900 | H | 4.62839500  | -6.03753900 | -3.58530600 |
| N | 3.42258100  | 2.66418800  | -1.55297300 | N | 3.39510400  | 2.65125600  | -1.57306800 |
| C | 2.82249000  | 1.68717300  | -0.86842600 | C | 2.79705200  | 1.68674700  | -0.87035400 |
| N | 2.30638700  | 0.59882100  | 1.15079500  | N | 2.29957500  | 0.61048000  | 1.15251900  |
| C | 3.23207800  | 1.32390300  | 0.53804100  | C | 3.22133000  | 1.33329100  | 0.53464800  |
| C | 4.45672600  | 1.62805400  | 1.15416500  | C | 4.44445800  | 1.64770200  | 1.15013200  |
| H | 5.22253400  | 2.17710600  | 0.62429200  | H | 5.21007800  | 2.19426600  | 0.61729800  |
| C | 4.66384800  | 1.22996500  | 2.45452400  | C | 4.65031900  | 1.26270000  | 2.45530000  |
| H | 5.59873600  | 1.46474800  | 2.95395000  | H | 5.58396000  | 1.50495600  | 2.95351400  |
| C | 3.66369400  | 0.52486100  | 3.14195400  | C | 3.64972000  | 0.56343400  | 3.14872900  |
| C | 3.79164000  | 0.09976100  | 4.50017100  | C | 3.76871000  | 0.15107000  | 4.51205100  |
| H | 4.68973400  | 0.36583900  | 5.04835300  | H | 4.66330000  | 0.42153000  | 5.06386500  |
| C | 2.81249000  | -0.62707300 | 5.09481500  | C | 2.78557800  | -0.57025000 | 5.10812800  |
| H | 2.91614600  | -0.94941700 | 6.12603400  | H | 2.88445900  | -0.88288800 | 6.14282300  |
| C | 1.63379000  | -1.00018500 | 4.37695500  | C | 1.60952300  | -0.94985200 | 4.38846600  |
| C | 0.62055200  | -1.80082500 | 4.93177200  | C | 0.59130100  | -1.74571500 | 4.94138100  |
| H | 0.70069700  | -2.13532200 | 5.96157100  | H | 0.66263000  | -2.07286000 | 5.97419400  |
| C | -0.44729400 | -2.17984700 | 4.15617600  | C | -0.47013300 | -2.13133600 | 4.15908600  |
| H | -1.22905200 | -2.82724700 | 4.53150000  | H | -1.25412200 | -2.77756000 | 4.53206400  |
| C | -0.51597000 | -1.72669400 | 2.82905500  | C | -0.52746800 | -1.68667200 | 2.82872400  |
| C | 1.46229700  | -0.57642400 | 3.04129700  | C | 1.44720300  | -0.53668100 | 3.04868400  |
| C | 2.49410100  | 0.21124200  | 2.41832600  | C | 2.48385800  | 0.24146700  | 2.42391200  |
| N | -1.53239300 | -1.84575900 | 0.65452600  | N | -1.50635900 | -1.81777400 | 0.64018500  |
| C | -1.58132600 | -2.22157800 | 1.93090800  | C | -1.57699600 | -2.18881700 | 1.91747200  |
| N | -2.48608000 | -3.04987600 | 2.44040400  | N | -2.48580000 | -3.02066600 | 2.41237800  |
| C | -3.36917300 | -3.58017600 | 1.61063700  | C | -3.35051700 | -3.55893900 | 1.56817100  |
| C | -3.29150500 | -3.25507600 | 0.23040000  | C | -3.25036200 | -3.23679300 | 0.18873800  |
| N | -2.39090700 | -2.37692100 | -0.19253900 | N | -2.34611300 | -2.35575400 | -0.22047700 |
| C | -4.44376400 | -4.46563800 | 2.19884500  | C | -4.42826900 | -4.45115800 | 2.13968000  |
| C | -5.11146100 | -5.29599500 | 1.09448100  | C | -5.07243400 | -5.28689900 | 1.02552700  |
| H | -4.46535300 | -6.14420900 | 0.84172500  | H | -4.41694300 | -6.13133400 | 0.78451200  |
| H | -6.02978000 | -5.73407200 | 1.49706200  | H | -5.99451700 | -5.73025700 | 1.41341100  |
| C | -5.42210400 | -4.48973600 | -0.15473000 | C | -5.36730500 | -4.48386900 | -0.22951500 |
| H | -6.11594000 | -3.67599700 | 0.08696700  | H | -6.06957700 | -3.67383000 | -0.00007600 |
| H | -5.94189300 | -5.11647200 | -0.88607500 | H | -5.87156500 | -5.11430900 | -0.96847400 |
| C | -4.17096500 | -3.90015800 | -0.82131600 | C | -4.10892000 | -3.88782400 | -0.87650400 |
| C | -5.46499400 | -3.53353900 | 2.87631000  | C | -5.46641900 | -3.52550200 | 2.80018800  |
| H | -4.98335100 | -2.92935700 | 3.64905700  | H | -5.00110800 | -2.91732100 | 3.57975000  |

|   |             |             |             |   |             |             |             |
|---|-------------|-------------|-------------|---|-------------|-------------|-------------|
| H | -6.24544400 | -4.13295900 | 3.35230000  | H | -6.24984200 | -4.13007800 | 3.26458800  |
| H | -5.94786900 | -2.85476800 | 2.16835300  | H | -5.94310600 | -2.85088200 | 2.08413000  |
| C | -3.84816500 | -5.39853300 | 3.25562800  | C | -3.84290200 | -5.37897000 | 3.20671800  |
| H | -3.42315400 | -4.84171300 | 4.09169800  | H | -3.43480700 | -4.81841700 | 4.04867800  |
| H | -3.06505900 | -6.03515900 | 2.83381200  | H | -3.04906000 | -6.01074200 | 2.79786100  |
| H | -4.63292900 | -6.05150000 | 3.64610800  | H | -4.62930000 | -6.03685100 | 3.58545500  |
| C | -3.34031400 | -5.00446600 | -1.49676100 | C | -3.26143600 | -4.98782000 | -1.53780400 |
| H | -3.93551900 | -5.49538900 | -2.27173000 | H | -3.84126200 | -5.48235500 | -2.32204800 |
| H | -3.00954600 | -5.77225900 | -0.79280700 | H | -2.93785700 | -5.75350600 | -0.82822100 |
| H | -2.45066700 | -4.57945000 | -1.96943000 | H | -2.36670300 | -4.55805100 | -1.99634000 |
| C | -4.59475000 | -2.88391800 | -1.88166900 | C | -4.52171500 | -2.87459200 | -1.94403600 |
| H | -3.73666800 | -2.49730600 | -2.43271800 | H | -3.65720700 | -2.48229500 | -2.48077300 |
| H | -5.12491500 | -2.03741900 | -1.43490300 | H | -5.06508400 | -2.03169300 | -1.50649100 |
| H | -5.27064400 | -3.36353000 | -2.59492100 | H | -5.18229600 | -3.35882200 | -2.66839100 |
| O | 0.60026900  | 2.59854700  | 0.88596800  | O | 0.61151800  | 2.58732200  | 0.87686900  |
| N | 0.00003600  | 3.27383700  | -0.00009900 | N | 0.00017200  | 3.26229000  | -0.00008100 |
| O | -0.60010900 | 2.59842100  | -0.88613500 | O | -0.61131400 | 2.58742600  | -0.87700100 |
| O | -0.00006300 | 4.47882500  | -0.00012200 | O | 0.00022600  | 4.46832000  | -0.00004100 |
| N | 0.39081900  | -0.91429500 | 2.30206800  | N | 0.38190900  | -0.87709900 | 2.30386500  |
| O | 1.90538100  | 1.01016800  | -1.37712600 | O | 1.86542300  | 1.01440400  | -1.35854500 |
| C | 4.22763000  | 3.68992400  | -0.95767600 | C | 4.21385600  | 3.67716200  | -0.99708900 |
| C | 3.67618600  | 4.55039400  | -0.01441900 | C | 3.67688600  | 4.55093500  | -0.05762900 |
| C | 5.55038600  | 3.85029100  | -1.36290700 | C | 5.53358900  | 3.82393700  | -1.41656200 |
| C | 4.46478700  | 5.55032500  | 0.54024000  | C | 4.47740500  | 5.55125100  | 0.47884000  |
| H | 2.63647100  | 4.44587200  | 0.28088200  | H | 2.63974300  | 4.45506800  | 0.24961100  |
| C | 6.32239800  | 4.85639300  | -0.80246000 | C | 6.31763200  | 4.83060900  | -0.87396100 |
| H | 5.97857500  | 3.17873800  | -2.10135200 | H | 5.95002900  | 3.14171300  | -2.15192700 |
| H | 4.02675200  | 6.21898000  | 1.27532300  | H | 4.05102900  | 6.23047800  | 1.21108100  |
| H | 7.35474900  | 4.97223300  | -1.11936700 | H | 7.34773100  | 4.93608100  | -1.20163200 |
| C | 6.62742800  | 6.83289600  | 0.72972800  | C | 6.65028100  | 6.82105500  | 0.63415800  |
| H | 6.60323300  | 7.70869900  | 0.07295400  | H | 6.62526300  | 7.69017500  | -0.03140400 |
| H | 7.67409100  | 6.53939600  | 0.83576800  | H | 7.69601700  | 6.52180800  | 0.73301100  |
| H | 6.26233300  | 7.15076500  | 1.70806600  | H | 6.29686700  | 7.15141000  | 1.61265000  |
| C | 5.79567000  | 5.72424600  | 0.15935800  | C | 5.80577300  | 5.71209100  | 0.08345200  |
| C | 3.04562200  | 2.86910600  | -2.96464000 | C | 2.99977400  | 2.84603000  | -2.98111900 |
| C | 1.94616200  | 3.90079400  | -3.13551500 | C | 1.89838900  | 3.87656300  | -3.14669700 |
| H | 2.74363200  | 1.90144100  | -3.36345300 | H | 2.69242500  | 1.87541700  | -3.36873200 |
| H | 3.95462700  | 3.18350900  | -3.48207200 | H | 3.90250500  | 3.15583100  | -3.51211700 |
| H | 1.75306500  | 4.05271800  | -4.20034700 | H | 1.69584900  | 4.02336600  | -4.21051300 |
| H | 1.01673000  | 3.57463000  | -2.66507300 | H | 0.97351500  | 3.55206400  | -2.66646800 |
| H | 2.23395100  | 4.86501600  | -2.71047300 | H | 2.18959900  | 4.84291000  | -2.72892300 |
| O | -1.90531800 | 1.01032600  | 1.37708800  | O | -1.86536300 | 1.01473900  | 1.35850300  |
| C | -4.22735700 | 3.69026000  | 0.95749800  | C | -4.21307200 | 3.67809100  | 0.99700500  |
| C | -3.67591400 | 4.55062300  | 0.01414100  | C | -3.67583600 | 4.55165800  | 0.05750600  |

|   |             |            |             |   |             |            |             |
|---|-------------|------------|-------------|---|-------------|------------|-------------|
| C | -5.55008100 | 3.85072500 | 1.36278800  | C | -5.53273800 | 3.82532600 | 1.41652300  |
| C | -4.46449100 | 5.55055300 | -0.54055300 | C | -4.47603500 | 5.55222400 | -0.47897200 |
| H | -2.63623300 | 4.44598700 | -0.28124800 | H | -2.63873500 | 4.45542700 | -0.24976400 |
| C | -6.32206700 | 4.85682900 | 0.80230700  | C | -6.31646200 | 4.83224300 | 0.87391300  |
| H | -5.97826000 | 3.17925400 | 2.10131300  | H | -5.94938300 | 3.14326600 | 2.15192500  |
| H | -4.02646800 | 6.21911600 | -1.27572600 | H | -4.04945500 | 6.23128400 | -1.21124800 |
| H | -7.35439300 | 4.97275400 | 1.11926300  | H | -7.34651500 | 4.93807200 | 1.20161400  |
| C | -6.62706800 | 6.83323100 | -0.73002100 | C | -6.64848900 | 6.82275300 | -0.63426200 |
| H | -6.60264200 | 7.70914600 | -0.07340600 | H | -6.62307500 | 7.69192100 | 0.03122300  |
| H | -7.67378500 | 6.53984300 | -0.83582100 | H | -7.69434700 | 6.52388900 | -0.73298000 |
| H | -6.26210800 | 7.15088300 | -1.70848000 | H | -6.29505300 | 7.15289000 | -1.61281900 |
| C | -5.79534200 | 5.72457700 | -0.15960700 | C | -5.80433900 | 5.71352000 | -0.08354700 |
| C | -1.94578000 | 3.90112400 | 3.13527600  | C | -1.89736300 | 3.87687100 | 3.14636200  |
| H | -2.74345000 | 1.90187100 | 3.36339000  | H | -2.69205300 | 1.87601400 | 3.36864800  |
| H | -3.95431500 | 3.18407300 | 3.48188100  | H | -3.90169200 | 3.15684600 | 3.51204500  |
| H | -1.75272300 | 4.05315900 | 4.20010000  | H | -1.69466300 | 4.02369700 | 4.21014400  |
| H | -1.01635500 | 3.57480100 | 2.66493400  | H | -0.97265100 | 3.55201300 | 2.66606300  |
| H | -2.23344500 | 4.86532500 | 2.71010200  | H | -2.18828700 | 4.84328000 | 2.72853300  |
| C | -3.04533900 | 2.86952800 | 2.96448400  | C | -2.99911500 | 2.84669800 | 2.98098600  |
| N | -3.42232800 | 2.66452900 | 1.55283500  | N | -3.39463600 | 2.65193700 | 1.57298900  |

## Appendix C

**Table 1.** The LSC data of  $^{241}\text{Am(III)}$  and  $^{152,154}\text{Eu}$  feed liquids.

| Sample | $^{241}\text{Am}$ Counts (CPM) | Average | $^{152,154}\text{Eu}$ Counts (CPM) | Average  |
|--------|--------------------------------|---------|------------------------------------|----------|
| 1      | 7201.67                        |         | 10955.01                           |          |
| 2      | 6949.71                        | 6876.61 | 11289.20                           | 11382.98 |
| 3      | 6478.44                        |         | 11904.72                           |          |

**Table 2.** The LSC data, distribution ratios and separation factors of  $^{241}\text{Am(III)}$  and  $^{152,154}\text{Eu}$  in the L1 acidity experiments.

| Acidity (M) | $^{241}\text{Am}$ Counts (CPM) | <i>D</i> | $^{152,154}\text{Eu}$ Counts (CPM) | <i>D</i> | <i>SF</i> <sub>Am(III)/Eu(III)</sub> |
|-------------|--------------------------------|----------|------------------------------------|----------|--------------------------------------|
| 0.1         | 6413.43                        | 0.07     | 10736.17                           | 0.06     | 1.03                                 |
|             | 6704.33                        | 0.03     | 11024.67                           | 0.03     |                                      |
|             | 6493.25                        | 0.06     | 10745.12                           | 0.06     |                                      |
| Average     |                                | 0.05     |                                    | 0.05     |                                      |
| 0.5         | 4937.29                        | 0.39     | 9710.87                            | 0.17     | 2.37                                 |
|             | 5212.56                        | 0.32     | 10033.15                           | 0.13     |                                      |
|             | 4492.56                        | 0.53     | 9342.15                            | 0.22     |                                      |
| Average     |                                | 0.41     |                                    | 0.18     |                                      |
| 1           | 2505.39                        | 1.74     | 9094.29                            | 0.25     | 6.67                                 |
|             | 2992.51                        | 1.30     | 9782.15                            | 0.16     |                                      |
|             | 2398.52                        | 1.87     | 8615.21                            | 0.32     |                                      |
| Average     |                                | 1.64     |                                    | 0.25     |                                      |
| 2           | 732.91                         | 8.38     | 5734.40                            | 0.99     | 8.49                                 |
|             | 924.15                         | 6.44     | 6311.57                            | 0.80     |                                      |
|             | 653.59                         | 9.52     | 5476.91                            | 1.08     |                                      |
| Average     |                                | 8.11     |                                    | 0.96     |                                      |
| 3           | 300.34                         | 21.90    | 3537.55                            | 2.22     | 9.25                                 |
|             | 462.21                         | 13.88    | 4725.78                            | 1.41     |                                      |
|             | 282.12                         | 23.37    | 3021.12                            | 2.77     |                                      |
| Average     |                                | 19.72    |                                    | 2.13     |                                      |
| 4           | 546.89                         | 11.57    | 3132.94                            | 2.63     | 4.78                                 |
|             | 614.63                         | 10.19    | 3395.19                            | 2.35     |                                      |
|             | 385.21                         | 16.85    | 2781.60                            | 3.09     |                                      |
| Average     |                                | 12.87    |                                    | 2.69     |                                      |

**Table 3.** The LSC data, distribution ratios and separation factors of  $^{241}\text{Am(III)}$  and  $^{152,154}\text{Eu}$  in the **L2** acidity experiments.

| Acidity (M) | $^{241}\text{Am}$ Counts (CPM) | $D$  | $^{152,154}\text{Eu}$ Counts (CPM) | $D$  | $SF_{\text{Am(III)/Eu(III)}}$ |
|-------------|--------------------------------|------|------------------------------------|------|-------------------------------|
| 0.1         | 5848.99                        | 0.18 | 10421.98                           | 0.09 | 1.67                          |
|             | 5924.12                        | 0.16 | 10523.15                           | 0.08 |                               |
|             | 5792.15                        | 0.19 | 9991.35                            | 0.14 |                               |
| Average     |                                | 0.17 |                                    | 0.10 |                               |
| 0.5         | 4126.02                        | 0.67 | 10531.75                           | 0.08 | 5.30                          |
|             | 4818.29                        | 0.43 | 10426.93                           | 0.09 |                               |
|             | 4303.19                        | 0.60 | 9925.18                            | 0.15 |                               |
| Average     |                                | 0.56 |                                    | 0.11 |                               |
| 1           | 2855.18                        | 1.41 | 9941.84                            | 0.14 | 7.86                          |
|             | 3045.05                        | 1.26 | 9985.86                            | 0.14 |                               |
|             | 2785.59                        | 1.47 | 9169.57                            | 0.24 |                               |
| Average     |                                | 1.38 |                                    | 0.18 |                               |
| 2           | 1646.45                        | 3.18 | 8965.31                            | 0.27 | 10.85                         |
|             | 1844.12                        | 2.73 | 9392.59                            | 0.21 |                               |
|             | 1596.82                        | 3.31 | 8325.15                            | 0.37 |                               |
| Average     |                                | 3.07 |                                    | 0.28 |                               |
| 3           | 1037.69                        | 5.63 | 8875.57                            | 0.28 | 17.79                         |
|             | 1181.25                        | 4.82 | 9301.83                            | 0.22 |                               |
|             | 998.17                         | 5.89 | 8061.58                            | 0.41 |                               |
| Average     |                                | 5.45 |                                    | 0.31 |                               |
| 4           | 1269.47                        | 4.42 | 8954.87                            | 0.27 | 16.98                         |
|             | 1742.62                        | 2.95 | 9629.92                            | 0.18 |                               |
|             | 1063.46                        | 5.47 | 8741.39                            | 0.30 |                               |
| Average     |                                | 4.28 |                                    | 0.25 |                               |

**Table 4.** The LSC data, distribution ratios and separation factors of  $^{241}\text{Am(III)}$  and  $^{152,154}\text{Eu}$  in the **L3** acidity experiments.

| Acidity (M) | $^{241}\text{Am}$ Counts (CPM) | $D$   | $^{152,154}\text{Eu}$ Counts (CPM) | $D$  | $SF_{\text{Am(III)/Eu(III)}}$ |
|-------------|--------------------------------|-------|------------------------------------|------|-------------------------------|
| 0.1         | 756.80                         | 8.09  | 9913.77                            | 0.15 | 56.43                         |
|             | 1021.18                        | 5.73  | 10324.52                           | 0.10 |                               |
|             | 685.72                         | 9.03  | 9862.56                            | 0.15 |                               |
| Average     |                                | 7.62  |                                    | 0.13 |                               |
| 0.5         | 239.87                         | 27.67 | 8158.37                            | 0.40 | 64.65                         |
|             | 262.41                         | 25.21 | 8634.15                            | 0.32 |                               |
|             | 208.19                         | 32.03 | 7115.98                            | 0.60 |                               |
| Average     |                                | 28.30 |                                    | 0.44 |                               |

|         |        |       |         |      |       |
|---------|--------|-------|---------|------|-------|
|         | 186.84 | 35.80 | 6385.84 | 0.78 |       |
| 1       | 206.78 | 32.26 | 7823.50 | 0.45 |       |
|         | 149.99 | 44.85 | 6295.27 | 0.81 |       |
| Average |        | 37.64 |         | 0.68 | 55.19 |
|         | 155.12 | 43.33 | 5957.72 | 0.91 |       |
| 2       | 176.43 | 37.98 | 7792.75 | 0.46 |       |
|         | 128.72 | 52.42 | 5615.29 | 1.03 |       |
| Average |        | 44.58 |         | 0.80 | 55.76 |
|         | 201.36 | 33.15 | 6508.14 | 0.75 |       |
| 3       | 239.61 | 27.70 | 8101.24 | 0.41 |       |
|         | 174.67 | 38.37 | 6420.95 | 0.77 |       |
| Average |        | 33.07 |         | 0.64 | 51.49 |
|         | 178.82 | 37.46 | 8161.58 | 0.39 |       |
| 4       | 271.37 | 24.34 | 8351.59 | 0.36 |       |
|         | 291.31 | 22.61 | 6625.68 | 0.72 |       |
| Average |        | 28.13 |         | 0.49 | 57.20 |

**Table 5.** The LSC data, distribution ratios and separation factors of  $^{241}\text{Am(III)}$  and  $^{152,154}\text{Eu}$  in the **L3** extractant concentration experiments.

| Extractant concentration (mM) | $^{241}\text{Am}$ Counts (CPM) | <i>D</i> | $^{152,154}\text{Eu}$ Counts (CPM) | <i>D</i> |
|-------------------------------|--------------------------------|----------|------------------------------------|----------|
| 2                             | 4462.59                        | 0.54     | 11059.30                           | 0.03     |
| 4                             | 2310.40                        | 1.98     | 10598.48                           | 0.07     |
| 8                             | 882.49                         | 6.79     | 9685.92                            | 0.18     |
| 12                            | 392.59                         | 16.52    | 9145.68                            | 0.24     |
| 16                            | 269.10                         | 24.55    | 7985.76                            | 0.43     |
| 20                            | 189.92                         | 35.21    | 6429.58                            | 0.77     |
